# Supplementary material for: General base-tuned unorthodox synthesis of amides and ketoesters with water
Source: Royal Society of Chemistry journal article supplement (doi:10.1039/c4cc07961b), 2014-11-11
Supplement: c4cc07961b1.pdf [file c4cc07961b1.pdf]

## Electronic Supplementary Information

### General base-tuned unorthodox synthesis of amides and ketoesters with water

Saikat Khamarui, Rituparna Maiti and Dilip K. Maiti\*

Department of Chemistry, University of Calcutta, University College of Science,  
92, A. P. C. Road, Kolkata-700009, India

\*Corresponding author. Fax: 91-33-2351 9755, Tel: 91-33-2350 1014

*dkmchem@caluniv.ac.in*

| <u>Serial No.</u> | <u>Content</u>                                                                                                                 | <u>Page Numbers</u> |
|-------------------|--------------------------------------------------------------------------------------------------------------------------------|---------------------|
| 1.                | Materials and methods                                                                                                          | S-2                 |
| 2.                | General procedure for amidation through cleavage of terminal alkyne                                                            | S-2                 |
| 3.                | Characterization data of amides ( <b>6a-m</b> )                                                                                | S-2                 |
| 4.                | General procedure for the synthesis of amides ( <b>8</b> ) from benzylamines                                                   | S-7                 |
| 5.                | Characterization data of amides ( <b>8a-g</b> )                                                                                | S-7                 |
| 6.                | General procedure for the synthesis of ketoesters ( <b>9</b> )                                                                 | S-10                |
| 7.                | Characterization data of ketoesters ( <b>9a-e, D<sub>2</sub>-9a</b> )                                                          | S-10                |
| 8.                | General procedure for the synthesis of ketoesters ( <b>11</b> ) using potassiumcarboxylates                                    | S-12                |
| 9.                | Characterization data of ketoesters ( <b>11a-c</b> )                                                                           | S-12                |
| 10.               | References                                                                                                                     | S-13                |
| 11.               | <sup>1</sup> H and <sup>13</sup> C-NMR spectra of the compounds ( <b>6a-m, 8a-g, 9a-e, D<sub>2</sub>-9a</b> and <b>11a-c</b> ) | S-14                |
| 12.               | Crystal summary data of compound <b>9a</b> (CCDC 973403)                                                                       | S-44                |
| 13.               | CIF data of compound <b>9a</b> (CCDC 973403)                                                                                   | S-44                |

## 1. Materials and methods

All reagents were purchased from commercial suppliers and used without further purification, unless otherwise specified. Commercially supplied ethyl acetate and petroleum ether were distilled before use.  $\text{CH}_2\text{Cl}_2$  was dried by distillation over  $\text{P}_2\text{O}_5$ . Petroleum ether used in our experiments was in the boiling range of  $60^\circ\text{-}80^\circ\text{C}$ . Column chromatography was performed on silica gel (60-120 mesh, 0.120 mm-0.250 mm). Analytical thin layer chromatography was performed on 0.25 mm extra hard silica gel plates with UV254 fluorescent indicator. Reported melting points are uncorrected.  $^1\text{H}$  NMR and  $^{13}\text{C}$  NMR spectra (Bruker Advance 300) were recorded at ambient temperature using 300 MHz spectrometers (300 MHz for  $^1\text{H}$  and 75 MHz for  $^{13}\text{C}$ ). Chemical shift is reported in ppm from internal reference tetramethylsilane and coupling constant in Hz. Proton multiplicities are represented as s (singlet), d (doublet), dd (double doublet), t (triplet), q (quartet), and m (multiplet). Infrared spectra were recorded on FT-IR spectrometer (Perkin Elmer Spectrum 100) in thin film. HR-MS data were acquired by electron spray ionization technique on a Q-tof-micro quadrupole mass spectrophotometer (Bruker). Optical rotation of the chiral compounds was measured in a polarimeter using standard 10 cm quartz cell in sodium-D lamp at ambient temperature. MIR-ATR spectroscopy of the inline reaction was executed by React IR 15 of Mettler Toledo using iC IR 4.3 software.

## 2. General procedure for amidation through cleavage of terminal alkyne

Terminal alkyne (**1**, 1.0 mmol, 102 mg) and iodobenzene diacetate (3.0 mmol, 966 mg) were stirred for 30 min. and allowed to react with aqueous sodium bicarbonate solution (2.1 mmol, 176 mg in 2.0 mL of water) under stirring conditions at ambient temperature. After one hour amine (**2**, 1.5 mmol) was added in a drop-wise manner. The reaction was monitored by thin layer chromatography (TLC). The post-reaction mixture was extracted with EtOAc (2x15 mL), and the combined organic layer was washed successively with saturated sodium bicarbonate solution (1x10 mL) and brine (1x10 mL). It was then dried over anhydrous  $\text{Na}_2\text{SO}_4$ , filtered and evaporated in a rotary evaporator under reduced pressure at room temperature. Thus, the reaction with phenylacetylene (**1a**, 102 mg, 1.0 mmol) and *n*-butylamine (1.5 mmol, 148 mg) afforded *N*-butylbenzamide (**6a**) after purification by column chromatography on silica gel (60-120 mesh) with ethyl acetate-petroleum ether (1:24, v/v) as an eluent in a yield of 85% (150 mg, 0.85 mmol). The structure of the product (**6a**) was confirmed with the help of the literature.<sup>1</sup> The synthesized amides (**6a-l**) were characterized by means of NMR ( $^1\text{H}$  and  $^{13}\text{C}$ ), FT-IR, melting point (solid compounds), and mass (HR-MS) spectral analyses.

## 3. Characterization data of amides (6a-m)

### 3.1. *n*-Butylbenzamide (**6a**)

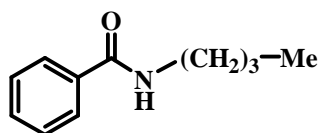

Yield: 85% (150 mg, 0.85 mmol).

Characteristic: Yellow oil.

$^1\text{H}$  NMR (300 MHz,  $\text{CDCl}_3$ ):  $\delta$  0.97 (3H, t,  $J = 6.0$  Hz), 1.36-1.48 (2H, m), 1.56-1.66 (2H, m), 3.43-3.50 (2H, m), 6.15 (1H, brs), 7.40-7.52 (3H, m), 7.75-7.78 (2H, m).

$^{13}\text{C}$  NMR (75 MHz,  $\text{CDCl}_3$ ):  $\delta$  13.7, 20.1, 31.7, 39.8, 126.8, 128.5, 131.3, 134.8, 167.5.

FT-IR (neat,  $\text{cm}^{-1}$ ): 1308, 1490, 1542, 1578, 1603, 1640, 2872, 2931, 2959.

HR-MS ( $m/z$ ) for  $\text{C}_{11}\text{H}_{15}\text{NO}$  ( $\text{M}^+$ ): Calculated 177.1154, found 177.1156.

### 3.2. n-Dodecylbenzamide (6b)

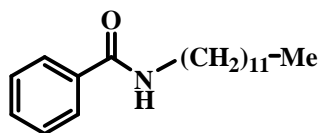

Yield: 83% (240 mg, 0.83 mmol).

Characteristic: Colourless solid.

Melting range: 66-69 °C

<sup>1</sup>H NMR (300 MHz, CDCl<sub>3</sub>): δ 0.87 (3H, t, *J* = 6.9 Hz), 1.25-1.31 (18H, m), 1.54-1.61 (2H, m), 3.38-3.44 (2H, m), 6.41 (1H, brs), 7.26-7.46 (3H, m), 7.74-7.77 (2H, m).

<sup>13</sup>C NMR (75 MHz, CDCl<sub>3</sub>): δ 14.0, 22.6, 27.0, 29.3, 29.6, 31.9, 40.1, 126.8, 128.4, 131.2, 134.9, 167.5.

FT-IR (KBr, cm<sup>-1</sup>): 1282, 1303, 1322, 1473, 1531, 1578, 1603, 1631, 2849, 2920, 3340.

HR-MS (*m/z*) for C<sub>19</sub>H<sub>31</sub>NO(M<sup>+</sup>): Calculated 289.2406, found 289.2407.

### 3.3. n-Butyl-4-methylbenzamide (6c)

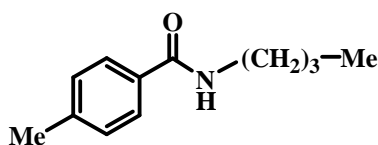

Yield: 82% (156 mg, 0.82 mmol).

Characteristic: Yellow oil.

<sup>1</sup>H NMR (300 MHz, CDCl<sub>3</sub>): δ 0.97 (3H, t, *J* = 6.0 Hz), 1.33-1.47 (2H, m), 1.54-1.64 (2H, m), 2.38 (3H, s), 3.41-3.48 (2H, m), 6.09 (1H, brs), 7.22 (2H, d, *J* = 8.4 Hz), 7.65 (2H, d, *J* = 8.1 Hz).

<sup>13</sup>C NMR (75 MHz, CDCl<sub>3</sub>): δ 13.7, 20.1, 21.3, 31.7, 39.7, 126.7, 129.1, 132.0, 141.6, 167.4.

FT-IR (neat, cm<sup>-1</sup>): 1305, 1464, 1506, 1544, 1614, 1637, 2872, 2929, 2958.

HR-MS (*m/z*) for C<sub>12</sub>H<sub>17</sub>NO (M<sup>+</sup>): Calculated 191.1310, found 191.1309.

### 3.4. n-Propyl-2-chlorobenzamide (6d)

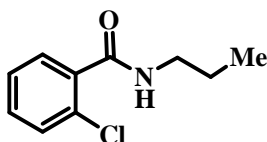

Yield: 62% (122 mg, 0.62 mmol).

Characteristic: Colourless solid.

Melting range: 102-103 °C

<sup>1</sup>H NMR (300 MHz, CDCl<sub>3</sub>): δ 0.95 (3H, t, *J* = 7.5 Hz), 1.54-1.66 (2H, m), 3.35 (2H, d, *J* = 7.2 Hz), 6.45 (1H, brs), 7.21-7.35 (3H, m), 7.51-7.54 (1H, m).

<sup>13</sup>C NMR (75 MHz, CDCl<sub>3</sub>): δ 11.4, 22.6, 41.7, 126.9, 129.8, 130.0, 130.5, 130.9, 135.5, 166.6.

FT-IR (KBr, cm<sup>-1</sup>): 1144, 1259, 1314, 1436, 1551, 1595, 1651, 2860, 2935, 2967, 3284.

HR-MS (*m/z*) for C<sub>10</sub>H<sub>12</sub>ClNO(M<sup>+</sup>): Calculated 197.0607, found 197.0605 (One of the peaks).

### 3.5. *n*-Propylthiophene-3-carboxamide (6e)

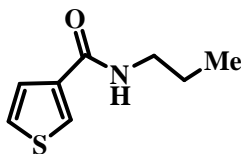

Yield: 68% (115 mg, 0.68 mmol).

Characteristic: Yellow oil.

$^1\text{H}$  NMR (300 MHz,  $\text{CDCl}_3$ ):  $\delta$  0.97 (3H, t,  $J = 7.2$  Hz), 1.59-1.68 (2H, m), 3.38 (2H, q,  $J = 6.9$  Hz), 5.96 (1H, brs), 7.31-7.38 (2H, m), 7.83 (1H, d,  $J = 1.2$  Hz).

$^{13}\text{C}$  NMR (75 MHz,  $\text{CDCl}_3$ ):  $\delta$  11.3, 22.9, 41.5, 125.9, 126.4, 127.8, 132.3, 168.5.

FT-IR (neat,  $\text{cm}^{-1}$ ): 1094, 1292, 1407, 1551, 1604, 1630, 2927, 2962, 3398.

HR-MS ( $m/z$ ) for  $\text{C}_8\text{H}_{11}\text{NO}$  ( $\text{M}^+$ ): Calculated 169.0561, found 169.0562.

### 3.6. *N*-Cyclohexylbenzamide (6f)

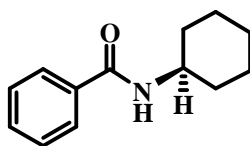

Yield: 74% (150 mg, 0.74 mmol).

Characteristic: Colourless solid.

Melting range: 90-94 °C

$^1\text{H}$  NMR (300 MHz,  $\text{CDCl}_3$ ):  $\delta$  1.20-1.42 (5H, m), 1.58-1.62 (1H, m), 1.68-1.72 (2H, m), 1.94-1.98 (2H, m), 3.86-3.98 (1H, m), 6.36 (1H, d,  $J = 6.6$  Hz), 7.32-7.45 (3H, m), 7.74 (2H, d,  $J = 7.2$  Hz).

$^{13}\text{C}$  NMR (75 MHz,  $\text{CDCl}_3$ ):  $\delta$  24.9, 25.5, 33.1, 48.7, 126.9, 128.4, 131.1, 135.0, 166.7.

FT-IR (KBr,  $\text{cm}^{-1}$ ): 1291, 1328, 1446, 1488, 1534, 1577, 1603, 1628, 2850, 2929, 3240, 3329.

HR-MS ( $m/z$ ) for  $\text{C}_{13}\text{H}_{17}\text{NO}$  ( $\text{M}^+$ ): Calculated 203.1310, found 203.1312.

### 3.7. Benzoylamino-acetic acid ethyl ester (6g)

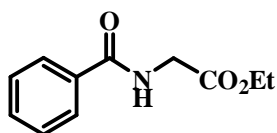

Yield: 60% (124 mg, 0.60 mmol).

Characteristic: Colourless solid.

Melting range: 102-104 °C

$^1\text{H}$  NMR (300 MHz,  $\text{CDCl}_3$ ):  $\delta$  1.30 (3H, t,  $J = 7.2$  Hz), 4.21-4.28 (4H, m), 6.87 (1H, brs), 7.40-7.53 (3H, m), 7.82 (2H, d,  $J = 8.4$  Hz).

$^{13}\text{C}$  NMR (75 MHz,  $\text{CDCl}_3$ ):  $\delta$  14.1, 41.8, 61.5, 127.0, 128.5, 131.7, 133.8, 167.4, 170.0.

FT-IR (KBr,  $\text{cm}^{-1}$ ): 1175, 1223, 1450, 1603, 1629, 1736, 2945.

HR-MS ( $m/z$ ) for  $\text{C}_{11}\text{H}_{14}\text{NO}_3$  ( $\text{M}^+ + \text{H}$ ): Calculated 208.0975, found 208.0972.

### 3.8. *N,N*-Diisopropylbenzamide (6h)

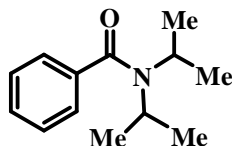

Yield: 75% (153 mg, 0.75 mmol).

Characteristic: Yellow solid.

Melting range: 58-60 °C

<sup>1</sup>H NMR (300 MHz, CDCl<sub>3</sub>): δ 0.82-1.83 (12H, broad peak), 3.27-4.02 (2H, broad peak), 7.27-7.41 (5H, m).

<sup>13</sup>C NMR (75 MHz, CDCl<sub>3</sub>): δ 20.7, 51.2, 125.5, 128.4, 128.6, 138.8, 171.1.

FT-IR (KBr, cm<sup>-1</sup>): 1156, 1211, 1340, 1371, 1440, 1605, 1628, 2936, 2968.

HR-MS (*m/z*) for C<sub>13</sub>H<sub>19</sub>NO(M<sup>+</sup>): Calculated 205.1467, found 205.1467.

### 3.9. (*R*)-*N*-(1-Cyclohexylethyl)benzamide (6i)

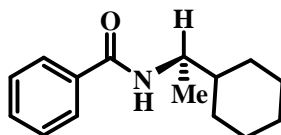

Yield: 62% (122 mg, 0.62 mmol).

Characteristic: Colorless solid.

Melting range: 105-108 °C

[α]<sub>D</sub><sup>20</sup> = -60.9° (c 1.2, CHCl<sub>3</sub>).

<sup>1</sup>H NMR (300 MHz, CDCl<sub>3</sub>): δ 1.03-1.27 (9H, m), 1.43-1.46 (1H, m), 1.66-1.85 (4H, m), 4.07-4.12 (1H, m), 5.97-5.99 (1H, m), 7.41-7.50 (3H, m), 7.76-7.79 (2H, m).

<sup>13</sup>C NMR (75 MHz, CDCl<sub>3</sub>): δ 18.0, 26.1, 26.4, 29.1, 43.3, 49.8, 126.8, 128.4, 128.5, 131.2, 135.1, 166.9.

FT-IR (KBr, cm<sup>-1</sup>): 1230, 1347, 1443, 1539, 1604, 1635, 2857, 2926, 3342.

HR-MS (*m/z*) for C<sub>15</sub>H<sub>21</sub>NO(M<sup>+</sup>): Calculated 231.1623, found 231.1626.

HPLC data:

Column : chiralpak IB (1B00CE-LF003); Detection : Single Peak

Mobile Phase : hex/ea 99:1; Temperature : 25 °C

Flow Rate : 0.8 ml/min; Pressure : 26 kgf.

### 3.10. (*R,R*)-Bis(*N*-benzoyl)cyclohexyldiamine (6j)

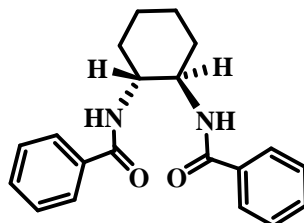

Yield: 68% (219 mg, 0.68 mmol).

Characteristic: Colourless solid.

Melting range: 210-215 °C

[α]<sub>D</sub><sup>20</sup> = +111.2° (c 1.6, CHCl<sub>3</sub>).

$^1\text{H}$  NMR (300 MHz,  $\text{CDCl}_3$ ):  $\delta$  1.41-1.52 (4H, m), 1.86 (2H, d,  $J = 6.3$  Hz), 2.24 (2H, d,  $J = 10.5$  Hz), 4.06 (2H, d,  $J = 7.5$  Hz), 7.06 (2H, d,  $J = 5.7$  Hz), 7.25 (4H, t,  $J = 7.5$  Hz), 7.36-7.41 (2H, m), 7.67-7.72 (4H, m).

$^{13}\text{C}$  NMR (75 MHz,  $\text{CDCl}_3$ ):  $\delta$  24.8, 32.3, 54.5, 126.9, 128.4, 131.3, 134.2, 168.2.

FT-IR (KBr,  $\text{cm}^{-1}$ ): 1303, 1328, 1489, 1533, 1578, 1602, 1630, 2857, 2933, 3302.

HR-MS ( $m/z$ ) for  $\text{C}_{20}\text{H}_{22}\text{N}_2\text{O}_2(\text{M}^+)$ : Calculated 322.1681, found 322.1682.

HPLC data:

Column : chiralpak IB (1B00CE-LF003); Detection : Single Peak

Mobile Phase : hex/ea 98:2; Temperature : 25  $^\circ\text{C}$

Flow Rate : 0.9 ml/min; Pressure : 26 kgf.

### 3.11. *N,N',N''*-(2,2',2''-Nitrilotris(ethane-2,1-diyl))tribenzamide (6k)

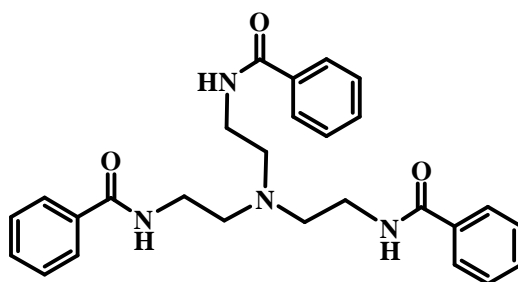

Yield: 66% (296 mg, 0.66 mmol).

Characteristic: Yellow solid.

Melting range: 132-135  $^\circ\text{C}$

$^1\text{H}$  NMR (300 MHz,  $\text{DMSO-d}_6$ ):  $\delta$  2.71 (6H, t,  $J = 6.3$  Hz), 3.20-3.45 (6H, m), 7.37 (6H, t,  $J = 7.2$  Hz), 7.44-7.46 (3H, m), 7.77-7.80 (6H, m), 8.37 (3H, t,  $J = 5.1$  Hz).

$^{13}\text{C}$  NMR (75 MHz,  $\text{DMSO-d}_6$ ):  $\delta$  38.1, 53.7, 127.5, 128.6, 131.4, 134.9, 166.8.

FT-IR (KBr,  $\text{cm}^{-1}$ ): 1311, 1457, 1491, 1542, 1577, 1604, 1632, 2802, 2927, 3289, 3348.

HR-MS ( $m/z$ ) for  $\text{C}_{27}\text{H}_{30}\text{N}_4\text{O}_3(\text{M}^+)$ : Calculated 458.2318, found 458.2317.

### 3.12. *N,N',N''*-(2,2',2''-Nitrilotris(ethane-2,1-diyl))trithiophene-3-carboxamide (6l)

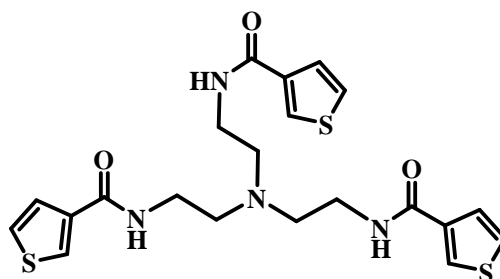

Yield: 61% (267 mg, 0.61 mmol).

Characteristic: Yellow oil.

$^1\text{H}$  NMR (300 MHz,  $\text{DMSO-d}_6$ ):  $\delta$  2.35 (6H, t,  $J = 6.3$  Hz), 2.52 (6H, t,  $J = 6.3$  Hz), 7.27 (3H, dd,  $J = 4.8$ , 3.0 Hz), 7.32 (3H, dd,  $J = 4.8$ , 0.9 Hz), 7.71 (3H, dd,  $J = 3.0$ , 1.2 Hz).

$^{13}\text{C}$  NMR (75 MHz,  $\text{DMSO-d}_6$ ):  $\delta$  39.8, 57.8, 124.2, 127.5, 129.8, 132.7, 167.3.

FT-IR (neat,  $\text{cm}^{-1}$ ): 1451, 1542, 1579, 1602, 1631, 2857, 2926, 3230.

HR-MS ( $m/z$ ) for  $\text{C}_{21}\text{H}_{24}\text{N}_4\text{O}_3\text{S}_3(\text{M}^+)$ : Calculated 476.1011, found 476.1016.

### 3.13. Hexanoic acid dodecylamide (6m)

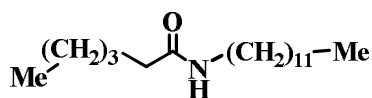

Yield: 65% (183 mg, 0.65 mmol).

Characteristic: Yellow oil.

$^1\text{H}$  NMR (300 MHz, DMSO- $d_6$ ):  $\delta$  0.42-0.45 (14H, m), 0.81-0.95 (12H, m), 1.04-1.13 (4H, m), 1.65-1.87 (4H, m), 2.94 (2H, t,  $J = 6.9$  Hz), 5.78 (1H, brs).

$^{13}\text{C}$  NMR (75 MHz, DMSO- $d_6$ ):  $\delta$  13.7, 13.8, 22.3, 22.4, 22.6, 25.5, 25.6, 28.1, 28.8, 29.4, 31.1, 31.2, 31.4, 31.8, 32.7, 33.0, 39.5, 164.5.

FT-IR (neat,  $\text{cm}^{-1}$ ): 1120, 1213, 1456, 1546, 1631, 2857, 2923, 3236.

HR-MS ( $m/z$ ) for  $\text{C}_{18}\text{H}_{37}\text{NO}(\text{M}^+)$ : Calculated 283.2875, found 283.2872.

## 4. General procedure for the synthesis of amides (8) from benzylamines

To a suspension of terminal alkynes (1.0 mmol, 102 mg) and iodobenzene diacetate (2.0 mmol, 644 mg) in water (2.0 mL) sodium bicarbonate (3.0 mmol, 252 mg) was added and allowed to stir for 15 min. Then benzylamine (2.0 mmol) was added dropwise under stirring conditions at room temperature. The completeness of the reaction was confirmed by monitoring in thin layer chromatography (TLC). The post reaction mixture was extracted with EtOAc (2x15 mL) and the combined organic layer was washed successively with saturated sodium bicarbonate solution (1x10 mL) and brine (3x10 mL). It was dried over anhydrous  $\text{Na}_2\text{SO}_4$ , filtered and evaporated in a rotary evaporator under reduced pressure at room temperature. Thus, the reaction with phenylacetylene (**1a**, 102 mg, 1.0 mmol) and 4-methylbenzylamine (1.0 mmol, 121 mg) afforded 4-methyl-*N*-(4-methylbenzyl)benzamide (**8b**) after purification by column chromatography on silica gel (60-120 mesh) with ethyl acetate-petroleum ether (1:19, v/v) as an eluent in a yield of 78% (186 mg, 0.78 mmol). The synthesized amide (**8a-f**) were characterized by means of NMR ( $^1\text{H}$  and  $^{13}\text{C}$ ), FT-IR and Mass (HR-MS) spectral analysis and comparing with the literature spectral data and melting points.<sup>3</sup>

## 5. Characterization data of amides (8a-g)

### 5.1. *N*-Benzyl-benzamide (8a)

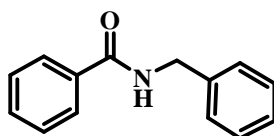

Yield: 80% (169 mg, 0.80 mmol).

Characteristic: Colourless solid.

Melting range: 101-102 °C

$^1\text{H}$  NMR (300 MHz,  $\text{CDCl}_3$ ):  $\delta$  4.65 (2H, d,  $J = 5.7$  Hz), 6.42 (1H, brs), 7.28-7.53 (8H, m), 7.79 (2H, d,  $J = 6.9$  Hz).

$^{13}\text{C}$  NMR (75 MHz,  $\text{CDCl}_3$ ):  $\delta$  44.1, 126.9, 127.6, 127.9, 128.6, 128.8, 131.5, 134.4, 138.1, 167.3.

FT-IR (KBr,  $\text{cm}^{-1}$ ): 1260, 1314, 1454, 1546, 1578, 1604, 1643, 2854, 2930, 3325.

HR-MS ( $m/z$ ) for  $\text{C}_{14}\text{H}_{13}\text{NO}(\text{M}^+)$ : Calculated 211.0997, found 211.0998.

### 5.2. 4-Methyl-N-(4-methylbenzyl)benzamide (8b)

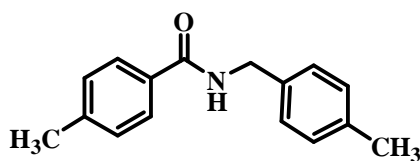

Yield: 78% (186 mg, 0.78 mmol).

Characteristic: Yellow solid.

Melting range: 140-142 °C

<sup>1</sup>H NMR (300 MHz, CDCl<sub>3</sub>): δ 2.35 (3H, s), 2.40 (3H, s), 4.60 (2H, d, *J* = 5.4 Hz), 6.33 (1H, brs), 7.12-7.27 (6H, m), 7.68 (2H, d, *J* = 8.1 Hz).

<sup>13</sup>C NMR (75 MHz, CDCl<sub>3</sub>): δ 21.0, 21.4, 43.8, 126.9, 127.9, 129.2, 129.4, 131.6, 135.2, 137.3, 141.9, 167.2.

FT-IR (KBr, cm<sup>-1</sup>): 1256, 1323, 1430, 1513, 1549, 1617, 1640, 2865, 2923, 3316.

HR-MS (*m/z*) for C<sub>16</sub>H<sub>17</sub>NO(M<sup>+</sup>): Calculated 239.1310, found 239.1310.

### 5.3. 4-Fluoro-N-(4-fluorobenzyl)benzamide (8c)

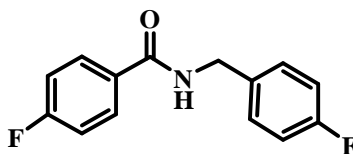

Yield: 65% (160 mg, 0.65 mmol).

Characteristic: Brown solid.

Melting range: 90-93 °C

<sup>1</sup>H NMR (300 MHz, CDCl<sub>3</sub>): δ 4.59 (2H, d, *J* = 5.7 Hz), 6.48 (1H, brs), 6.96-7.14 (4H, m), 7.27-7.34 (2H, m), 7.78-7.80 (2H, m).

<sup>13</sup>C NMR (75 MHz, CDCl<sub>3</sub>): δ 43.4, 115.4, 115.7, 129.2, 129.3, 129.5, 129.6, 130.3, 133.8, 166.3.

FT-IR (KBr, cm<sup>-1</sup>): 1154, 1222, 1511, 1547, 1601, 1634, 3278.

HR-MS (*m/z*) for C<sub>14</sub>H<sub>11</sub>F<sub>2</sub>NO(M<sup>+</sup>): Calculated 247.0809, found 247.0804 (one of the peaks).

### 5.4. N-Pyridine-4-ylmethyl-isonicotinamide (8d)

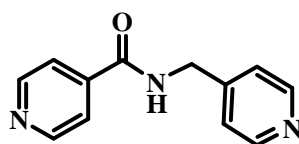

Yield: 60% (128 mg, 0.60 mmol).

Characteristic: Yellow solid.

Melting range: 167-170 °C

<sup>1</sup>H NMR (300 MHz, CDCl<sub>3</sub>): δ 5.09 (2H, s), 6.67 (1H, d, *J* = 5.7 Hz), 6.70 (1H, d, *J* = 6.0 Hz), 6.77-6.79 (1H, m), 7.31 (1H, d, *J* = 6.0 Hz), 7.48 (1H, d, *J* = 6.0 Hz), 7.95-8.03 (2H, m), 8.30-8.33 (1H, m), 8.40-8.44 (1H, m).

<sup>13</sup>C NMR (75 MHz, CDCl<sub>3</sub>): δ 54.4, 122.7, 122.9, 124.2, 124.3, 144.8, 148.2, 149.6, 149.7, 149.9, 150.0, 167.7.

FT-IR (KBr, cm<sup>-1</sup>): 1457, 1486, 1574, 1593, 1604, 1632, 2032, 2986.

HR-MS (*m/z*) for C<sub>12</sub>H<sub>11</sub>N<sub>3</sub>O(M<sup>+</sup>): Calculated 213.0902, found 213.0905.



### 5.5. 2-Nitro-N-(2-nitrobenzyl)benzamide (8e)

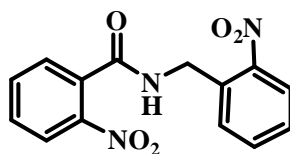

Yield: 73% (220 mg, 0.73 mmol).

Characteristic: Brown solid.

Melting range: 72-74 °C

$^1\text{H}$  NMR (300 MHz,  $\text{CDCl}_3$ ):  $\delta$  5.23 (2H, s), 7.46-7.48 (1H, m), 7.50-7.71 (2H, m), 7.74-7.88 (2H, m), 7.92-7.97 (1H, m), 8.04-8.12 (1H, m), 8.35-8.39 (1H, m), 8.89 (1H, s).

$^{13}\text{C}$  NMR (75 MHz,  $\text{CDCl}_3$ ):  $\delta$  61.3, 124.3, 124.7, 125.5, 128.0, 129.8, 130.4, 131.0, 133.4, 133.5, 134.1, 135.5, 159.2.

FT-IR (KBr,  $\text{cm}^{-1}$ ): 1207, 1273, 1323, 1339, 1378, 1514, 1570, 1609, 1638, 2850, 2921.

HR-MS ( $m/z$ ) for  $\text{C}_{14}\text{H}_{11}\text{N}_3\text{O}_5(\text{M}^+)$ : Calculated 301.0699, found 301.0691.

### 5.6. Naphthalene-1-carboxylic acid (naphthalen-1-ylmethyl)amide (8f)

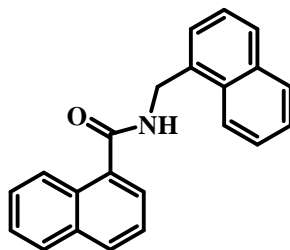

Yield: 60% (186 mg, 0.60 mmol).

Characteristic: Colourless solid.

Melting range: 112-113 °C

$^1\text{H}$  NMR (300 MHz,  $\text{CDCl}_3$ ):  $\delta$  5.08 (2H, d,  $J = 5.1$  Hz), 6.56 (1H, brs), 7.36-7.58 (8H, m), 7.76-7.91 (4H, m), 8.08-8.11 (2H, m).

$^{13}\text{C}$  NMR (75 MHz,  $\text{CDCl}_3$ ):  $\delta$  42.3, 123.4, 125.4, 126.0, 126.7, 126.8, 127.0, 128.5, 128.7, 128.8, 131.5, 133.4, 134.3, 167.2.

FT-IR (KBr,  $\text{cm}^{-1}$ ): 1265, 1313, 1549, 1577, 1600, 1634, 2939, 3065, 3280.

HR-MS ( $m/z$ ) for  $\text{C}_{22}\text{H}_{17}\text{NO}(\text{M}^+)$ : Calculated 311.1310, found 311.1316.

### 5.7. 4-Methyl-N-(2-nitrobenzyl)benzamide (8g) [Cross addition product]

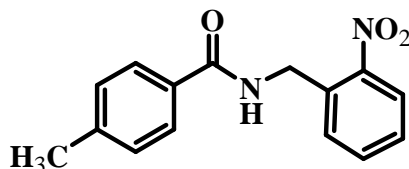

Yield: 40% (108 mg, 0.40 mmol).

Characteristic: Yellow solid.

Melting range: 107-110 °C

$^1\text{H}$  NMR (300 MHz,  $\text{CDCl}_3$ ):  $\delta$  2.37 (3H, s), 5.22 (2H, s), 7.45-7.50 (1H, m), 7.58-7.74 (4H, m), 8.04-8.12 (3H, m), 8.89 (1H, s).

$^{13}\text{C}$  NMR (75 MHz,  $\text{CDCl}_3$ ):  $\delta$  20.3, 61.3, 124.3, 124.7, 128.0, 129.8, 130.4, 130.8, 131.0, 133.4, 134.3, 141.7, 167.2.

FT-IR (KBr,  $\text{cm}^{-1}$ ): 1257, 1474, 1578, 1605, 1638, 2929, 3060.

HR-MS ( $m/z$ ) for  $\text{C}_{15}\text{H}_{15}\text{N}_2\text{O}_3$  ( $\text{M}^+\text{H}$ ): Calculated 271.1084, found 271.1083.

## 6. General procedure for the synthesis of ketoesters (9)

To a suspension of aromatic terminal alkynes (1.0 mmol, 102 mg) and iodobenzene diacetate (3.0 mmol, 966 mg) in water (2.0 mL) sodium bicarbonate (2.0 mmol, 168 mg) was added under vigorously stirring condition at room temperature. The appearance of the reaction mixture changed after 10 h. The oil (yellow) was separated out. The formation of product was checked by thin layer chromatography (TLC). The post reaction mixture was extracted with EtOAc (2x15 mL) and the combined organic layer was washed successively with saturated sodium bicarbonate solution (1x10 mL) and brine (1x10 mL). It was dried over anhydrous  $\text{Na}_2\text{SO}_4$ , filtered and evaporated in a rotary evaporator under reduced pressure at room temperature. Thus, the reaction with phenylacetylene (**1a**, 102 mg, 1.0 mmol) afforded benzoic acid 2-oxo-2-phenyl-ethyl ester (**9a**) after purification by column chromatography on silica gel (60-120 mesh) with ethyl acetate-petroleum ether (1:20, v/v) as an eluent in a yield of 65% (156 mg, 0.65 mmol). The  $\alpha$ -ketoesters (**3a-e**) were characterized by means of XRD, NMR ( $^1\text{H}$  and  $^{13}\text{C}$ ), FT-IR and Mass (HR-MS) spectral analysis.

## 7. Characterization data of ketoesters (9a-e, D<sub>2</sub>-9a)

### 7.1. Benzoic acid 2-oxo-2-phenylester (9a)

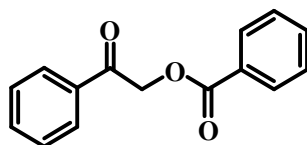

Yield: 65% (156 mg, 0.65 mmol).

Characteristic: Colourless solid.

Melting range: 117-120 °C

$^1\text{H}$  NMR (300 MHz,  $\text{CDCl}_3$ ):  $\delta$  5.56(2H, s), 7.42-7.51 (4H, m), 7.55-7.62 (2H, m), 7.93-7.96 (2H, m), 8.06-8.13 (2H, m).

$^{13}\text{C}$  NMR (75 MHz,  $\text{CDCl}_3$ ):  $\delta$  66.4, 127.8, 128.4, 128.6, 128.8, 129.9, 130.1, 133.3, 133.6, 133.8, 134.4, 166.0, 192.1.

FT-IR (KBr,  $\text{cm}^{-1}$ ): 1073, 1121, 1229, 1282, 1373, 1420, 1449, 1581, 1597, 1694, 1718, 2851, 2921.

HR-MS ( $m/z$ ) for  $\text{C}_{15}\text{H}_{12}\text{O}_3$  ( $\text{M}^+$ ): Calculated 240.0786, found 240.0786.

### 7.2. 4-Methyl-benzoic acid 2-oxo-2-p-tolyl-ester (9b)

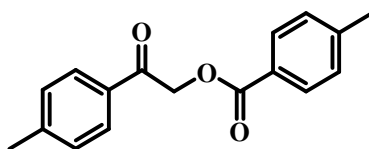

Yield: 70% (187 mg, 0.70 mmol).

Characteristic: Yellow solid.

Melting range: 107-108 °C

$^1\text{H}$  NMR (300 MHz,  $\text{CDCl}_3$ ):  $\delta$  2.38 (3H, s), 2.40 (3H, s), 5.51 (2H, s), 7.23-7.28 (4H, m), 7.84 (1H, d,  $J = 8.1$  Hz), 7.96-8.02 (3H, m).

$^{13}\text{C}$  NMR (75 MHz,  $\text{CDCl}_3$ ):  $\delta$  21.7, 66.2, 127.9, 129.1, 129.2, 129.5, 129.7, 130.0, 130.2, 130.6, 131.9, 144.4, 144.7, 166.1, 191.9.

FT-IR (KBr,  $\text{cm}^{-1}$ ): 1129, 1178, 1232, 1281, 1368, 1417, 1605, 1702, 1724, 2934.

HR-MS ( $m/z$ ) for  $\text{C}_{17}\text{H}_{16}\text{O}_3$  ( $\text{M}^+$ ): Calculated 268.1099, found 268.1097.

### 7.3. Thiophene-3-carboxylic acid 2-(2-thiophen-3-yl-ethylester) (9c)

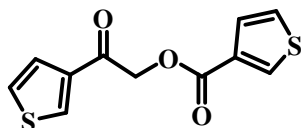

Yield: 66% (167 mg, 0.66 mmol).

Characteristic: Yellow oil.

$^1\text{H}$  NMR (300 MHz,  $\text{CDCl}_3$ ):  $\delta$  5.38 (2H, s), 7.32-7.39 (2H, m), 7.58-7.60 (2H, m), 8.15 (1H, d,  $J = 1.8$  Hz), 8.24 (1H, d,  $J = 2.4$  Hz).

$^{13}\text{C}$  NMR (75 MHz,  $\text{CDCl}_3$ ):  $\delta$  66.4, 126.1, 126.5, 126.8, 128.0, 132.2, 132.5, 133.6, 138.8, 161.9, 187.0.

FT-IR (neat,  $\text{cm}^{-1}$ ): 1404, 1465, 1650, 1690, 1718, 2342, 2853.

HR-MS ( $m/z$ ) for  $\text{C}_{11}\text{H}_8\text{O}_3\text{S}_2$  ( $\text{M}^+$ ): Calculated 251.9915, found 251.9911.

### 7.4. 2-Chloro-benzoic acid 2-(2-chloro-phenyl)-2-oxo-ethyl ester (9d)

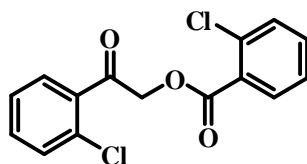

Yield: 68% (211 mg, 0.68 mmol).

Characteristic: Yellow oil.

$^1\text{H}$  NMR (300 MHz,  $\text{CDCl}_3$ ):  $\delta$  5.46 (2H, s), 7.32-7.53 (6H, m), 7.68-7.72 (1H, m), 7.97-8.00 (1H, m).

$^{13}\text{C}$  NMR (75 MHz,  $\text{CDCl}_3$ ):  $\delta$  68.9, 126.6, 127.2, 130.1, 130.6, 131.1, 132.3, 132.6, 133.0, 133.4, 134.1, 134.6, 135.8, 168.6, 195.0.

FT-IR (neat,  $\text{cm}^{-1}$ ): 1250, 1434, 1474, 1590, 1717, 2928.

HR-MS ( $m/z$ ) for  $\text{C}_{15}\text{H}_{10}\text{Cl}_2\text{O}_3$  ( $\text{M}^+$ ): Calculated 308.0007, found 308.0010 (One of the peaks).

### 7.5. 7-Methoxy-naphthalene-2-carboxylic acid 2-(7-methoxynaphthalen-2-yl)-2-oxo-ethyl ester (9e)

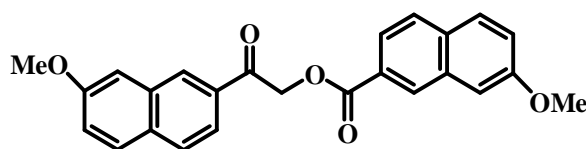

Yield: 62% (248 mg, 0.62 mmol).

Characteristic: Yellow viscous liquid.

$^1\text{H}$  NMR (300 MHz,  $\text{CDCl}_3$ ):  $\delta$  3.97 (6H, s), 4.99 (2H, d,  $J = 1.2$  Hz), 7.18-7.31 (7H, m), 7.85 (3H, dd,  $J = 16.8, 9.0$  Hz), 7.96 (1H, dd,  $J = 8.4, 1.5$  Hz), 8.37 (1H, s).

$^{13}\text{C}$  NMR (75 MHz,  $\text{CDCl}_3$ ):  $\delta$  55.4, 65.3, 105.9, 120.1, 123.8, 127.5, 127.7, 128.7, 129.3, 131.2, 137.9, 167.9, 197.9.

FT-IR (neat,  $\text{cm}^{-1}$ ): 1197, 1269, 1482, 1623, 1688, 1732, 2851, 2925.

HR-MS ( $m/z$ ) for  $C_{25}H_{20}O_5$  ( $M^+$ ): Calculated 400.1311, found 400.1310.

### 7.6. Deuteriated benzoic acid 2-oxo-2-phenyl-ethylester (**D<sub>2</sub>-9a**)

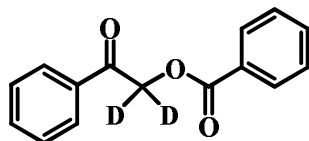

Yield: 65% (157 mg, 0.65 mmol).

Characteristic: Colourless solid.

Melting range: 119-120 °C

$^1H$  NMR (300 MHz,  $CDCl_3$ ):  $\delta$  7.47-7.56 (4H, m), 7.60-7.65 (2H, m), 7.98-8.01 (2H, m), 8.15-8.18 (2H, m).

$^{13}C$  NMR (75 MHz,  $CDCl_3$ ):  $\delta$  66.4, 127.8, 128.4, 128.6, 128.8, 129.9, 130.1, 133.3, 133.6, 133.8, 134.4, 166.0, 192.1.

FT-IR (KBr,  $cm^{-1}$ ): 1073, 1121, 1229, 1420, 1449, 1581, 1597, 1694, 1718, 2851, 2921.

HR-MS ( $m/z$ ) for  $C_{15}H_{10}D_2O_3$  ( $M^+$ ): Calculated 242.0912, found 242.0915.

## 8. General procedure for the synthesis of ketoesters (**11**) using potassiumcarboxylates

To a suspension of terminal alkyne (1.0 mmol, 102 mg) and iodobenzene diacetate (1.0 mmol, 322 mg) in water (2.0 mL) potassium salt of carboxylic acid (4.0 mmol) was added. The benzylamine (1.0 mmol) was added dropwise under stirring condition at room temperature. The oil was separated out after 10-15 min. The completeness of the reaction was confirmed by monitoring thin layer chromatography (TLC). The post reaction mixture was extracted with EtOAc (2x15 mL) and the combined organic layer was washed successively with saturated sodium bicarbonate solution (1x10 mL) and brine (1x10 mL). It was dried over anhydrous  $Na_2SO_4$ , filtered and evaporated in a rotary evaporator under reduced pressure at room temperature. Thus, the reaction with phenylacetylene (**1a**, 102 mg, 1.0 mmol) and sodiumcinnamate (4 mmol, 680 mg) afforded 3-phenyl-acrylic acid 2-oxo-2-phenyl-ethyl ester (**11a**) after purification by column chromatography on silica gel (60-120 mesh) with ethyl acetate-petroleum ether (1:18, v/v) as an eluent in an yield of 75% (199 mg, 0.75 mmol). The ketoesters (**11a-c**) were characterized by means of NMR ( $^1H$  and  $^{13}C$ ), FT-IR and Mass (HR-MS) spectral analysis.

## 9. Characterization data of ketoesters (**11a-c**)

### 9.1. Cinnamic acid 2-oxo-2-phenyl-ethyl ester (**11a**)

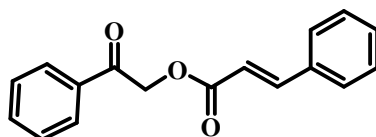

Yield: 75% (199 mg, 0.75 mmol).

Characteristic: Yellow oil.

$^1H$  NMR (300 MHz,  $CDCl_3$ ):  $\delta$  5.84 (2H, s), 6.60 (1H, d,  $J = 15.9$  Hz), 7.29-7.41 (4H, m), 7.48-7.65 (4H, m), 7.81 (1H, d,  $J = 15.9$  Hz), 7.96 (2H, d,  $J = 8.1$  Hz).

$^{13}C$  NMR (75 MHz,  $CDCl_3$ ):  $\delta$  66.1, 117.0, 117.8, 128.0, 128.2, 128.5, 128.6, 128.8, 128.9, 129.0, 129.1, 130.5, 133.8, 134.3, 146.1, 166.2, 192.3.

FT-IR (neat,  $cm^{-1}$ ): 1123, 1201, 1318, 1401, 1449, 1637, 1697, 1707, 2091, 2347.

HR-MS ( $m/z$ ) for  $C_{17}H_{14}O_3$  ( $M^+$ ): Calculated 266.0943, found 266.0941.

## 9.2. L-lactic acid 2-oxo-2-phenyl-ethyl ester (11b)

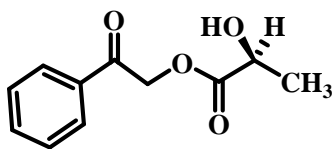

Yield: 69% (144 mg, 0.69 mmol).

Characteristic: Yellow oil.

$[\alpha]_D^{20} = -4.39^\circ$  (c 2.10,  $\text{CHCl}_3$ ).

$^1\text{H NMR}$  (300 MHz,  $\text{CDCl}_3$ ):  $\delta$  1.47 (3H, d,  $J = 6.9$  Hz), 4.48 (1H, q,  $J = 6.9$  Hz), 5.35 (1H, s), 5.39 (1H, s), 7.47-7.49 (2H, m), 7.57-7.62 (1H, m), 7.85-7.89 (2H, m).

$^{13}\text{C NMR}$  (75 MHz,  $\text{CDCl}_3$ ):  $\delta$  20.4, 66.5, 66.9, 127.7, 128.9, 133.9, 134.1, 175.0, 191.6.

FT-IR (neat,  $\text{cm}^{-1}$ ): 970, 1129, 1233, 1450, 1598, 1651, 1694, 1727, 3428.

HR-MS ( $m/z$ ) for  $\text{C}_{11}\text{H}_{12}\text{O}_4$  ( $\text{M}^+$ ): Calculated 208.0736, found 208.0735.

HPLC data:

Column : chiralpak IB (1B00CE-LF003); Detection : Single Peak

Mobile Phase : hex/ea 99:1; Temperature : 25 °C

Flow Rate : 0.8 ml/min; Pressure : 23 kgf.

## 9.3. Undecanoic acid 2-oxo-2-phenyl-ethyl ester (11c)

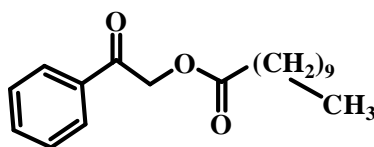

Yield: 72% (218 mg, 0.72 mmol).

Characteristic: Yellow oil.

$^1\text{H NMR}$  (300 MHz,  $\text{CDCl}_3$ ):  $\delta$  0.87 (3H, t,  $J = 6.9$  Hz), 1.08-1.42 (14H, broad peak), 1.64-1.72 (2H, m), 2.48 (2H, t,  $J = 7.5$  Hz), 5.33 (2H, s), 7.49 (2H, t,  $J = 7.5$  Hz), 7.57-7.60 (1H, m), 7.91 (2H, d,  $J = 7.5$  Hz).

$^{13}\text{C NMR}$  (75 MHz,  $\text{CDCl}_3$ ):  $\delta$  14.0, 22.6, 24.9, 29.1, 29.2, 29.4, 29.5, 31.8, 33.9, 65.8, 127.7, 128.8, 133.8, 134.3, 173.2, 192.3.

FT-IR (neat,  $\text{cm}^{-1}$ ): 1160, 1223, 1372, 1450, 1598, 1708, 1747, 2855, 2926.

HR-MS ( $m/z$ ) for  $\text{C}_{19}\text{H}_{28}\text{O}_3$  ( $\text{M}^+$ ): Calculated 304.2038, found 304.2037.

## 10. References

- (1) Muñoz, J. M.; Alcázar, J.; Hoz, A.; Díaz-Ortizb, Á.; Diego, S. A. A. *Green Chem.* **2012**, *14*, 1335-1341.
- (2) Cao, H.; McNamee, L.; Alper, H. *Org. Lett.* **2008**, *10*, 5281-5284.
- (3) T. Ohshima, Y. Hayashi, K. Agura, Y. Fujii, A. Yoshiyamab and K. Mashima; *Chem. Commun.* **2012**, *48*, 5434-5436.
- (4) Mo, D. L.; Doi, L. X.; Hou, X. L. *Tetrahedron Lett.* **2009**, *50*, 5578-5581.

11.  $^1\text{H}$  and  $^{13}\text{C}$ -NMR spectra of the compounds (6a-m, 8a-g, 9a-e, D<sub>2</sub>-9a and 11a-c)

SI Figure 1:  $^1\text{H}$  and  $^{13}\text{C}$ -NMR spectra of compound 6a

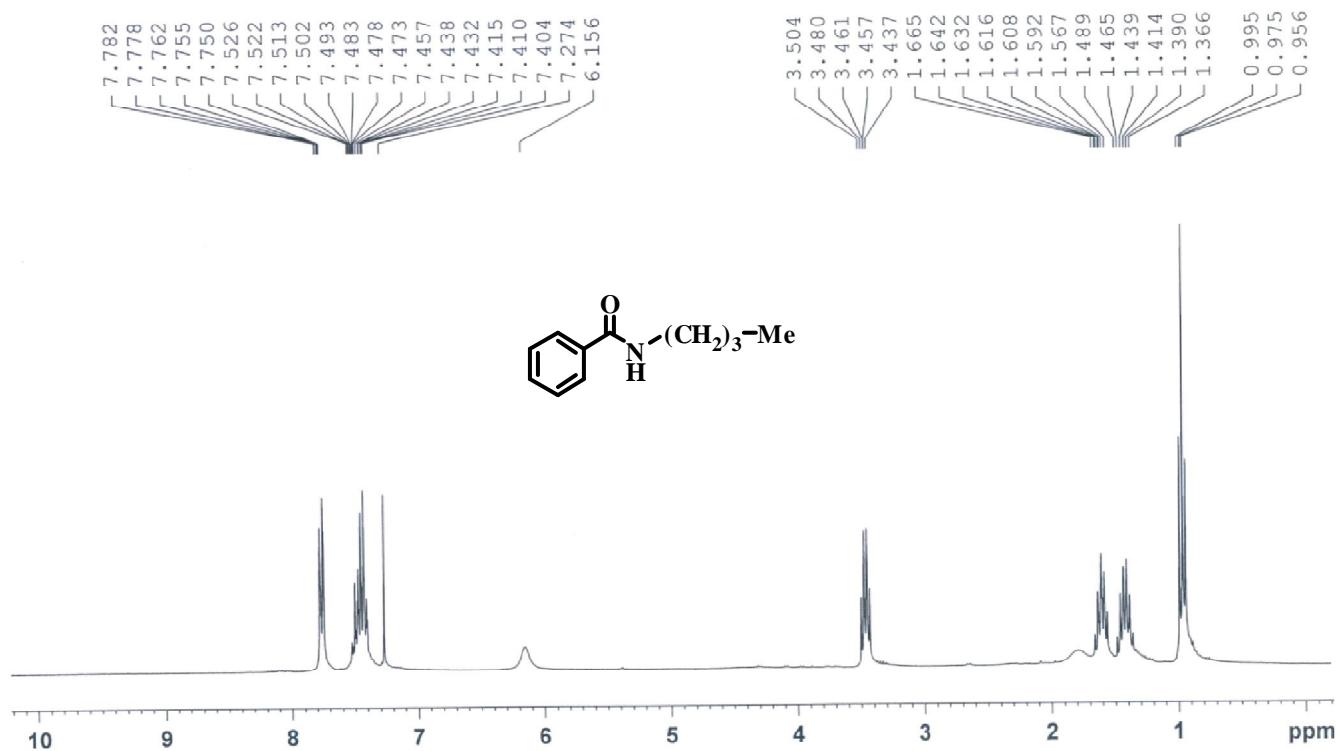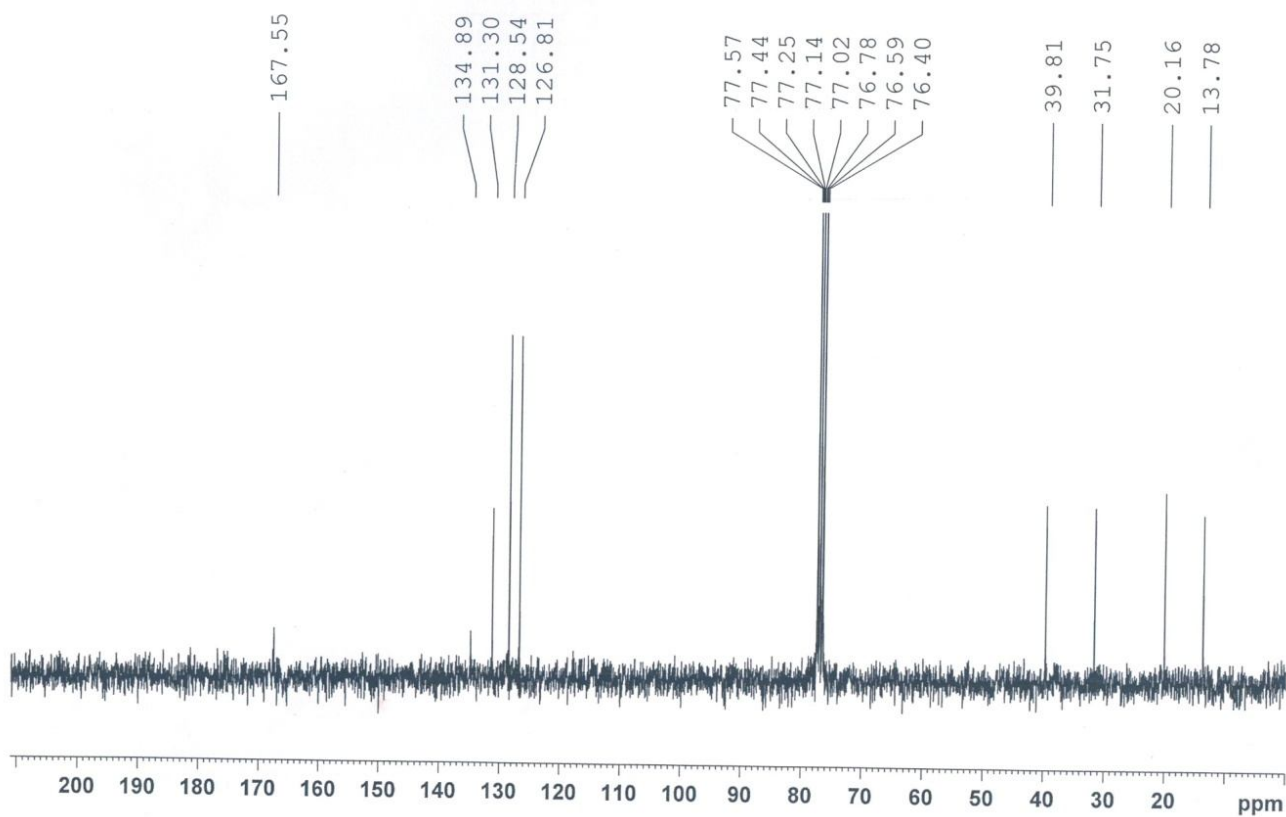

SI Figure 2:  $^1\text{H}$  and  $^{13}\text{C}$ -NMR spectra of compound **6b**

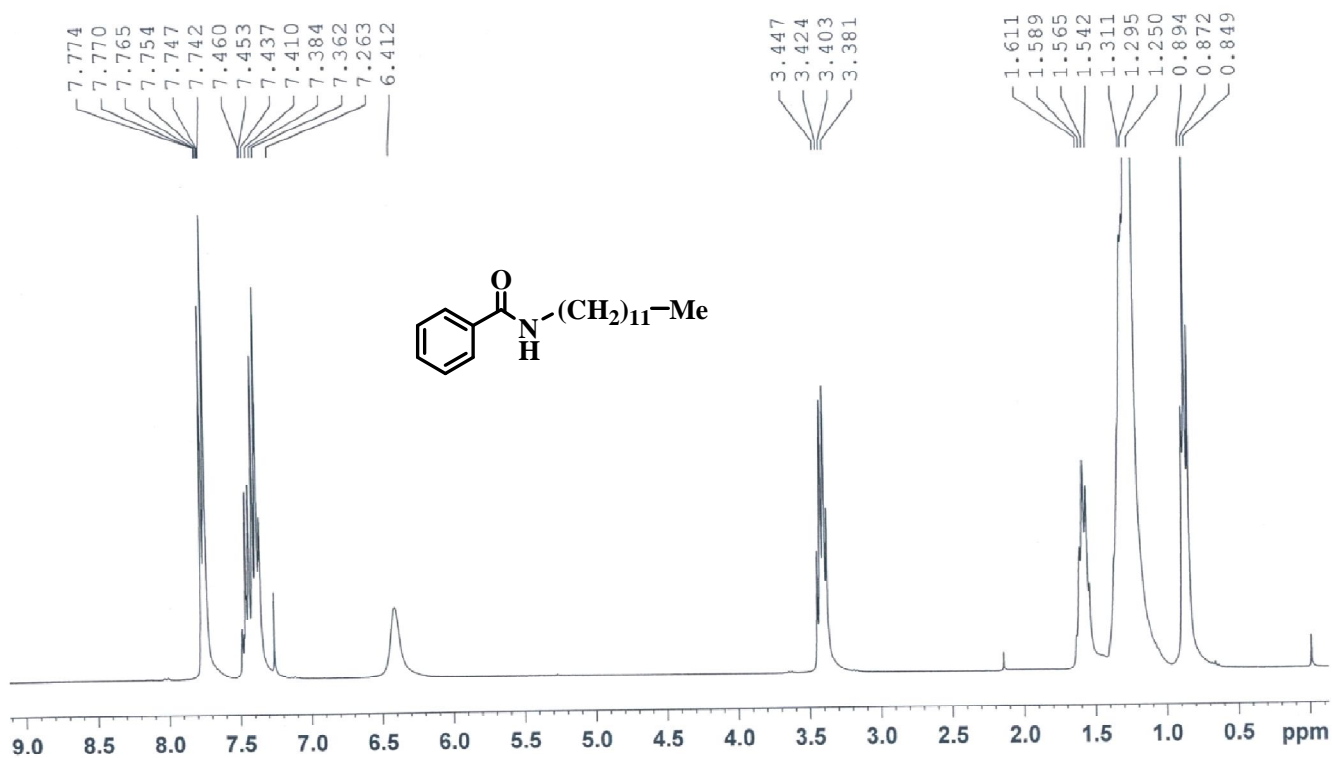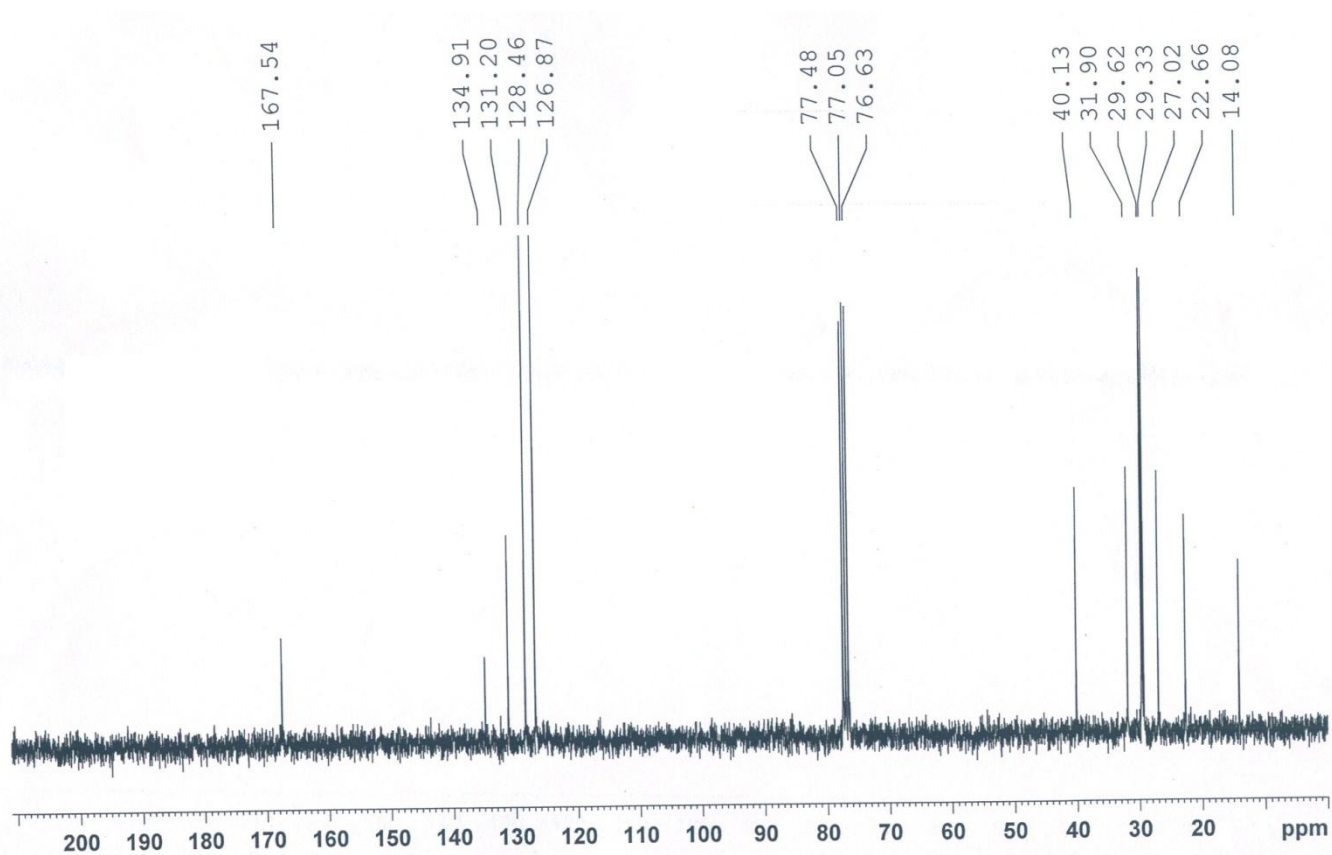

SI Figure 3:  $^1\text{H}$  and  $^{13}\text{C}$ -NMR spectra of compound **6c**

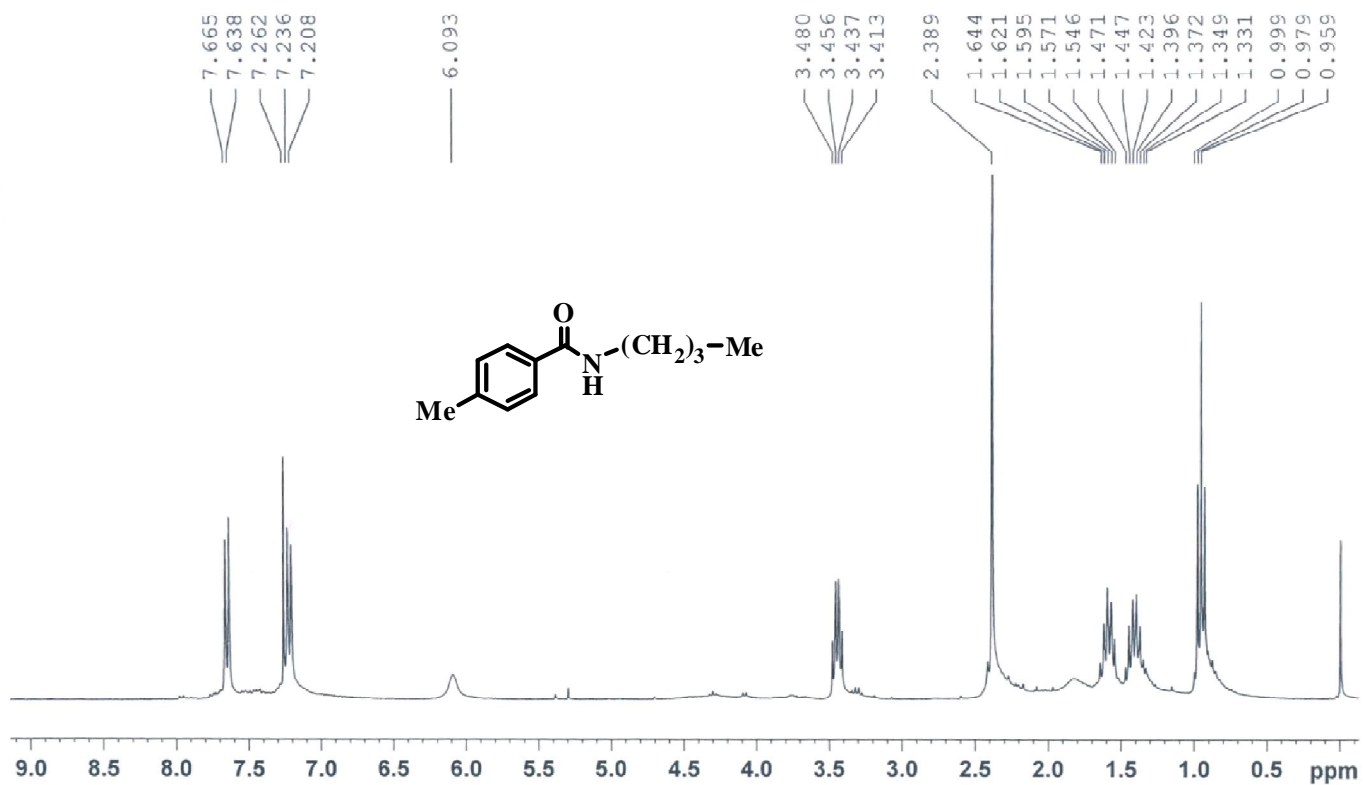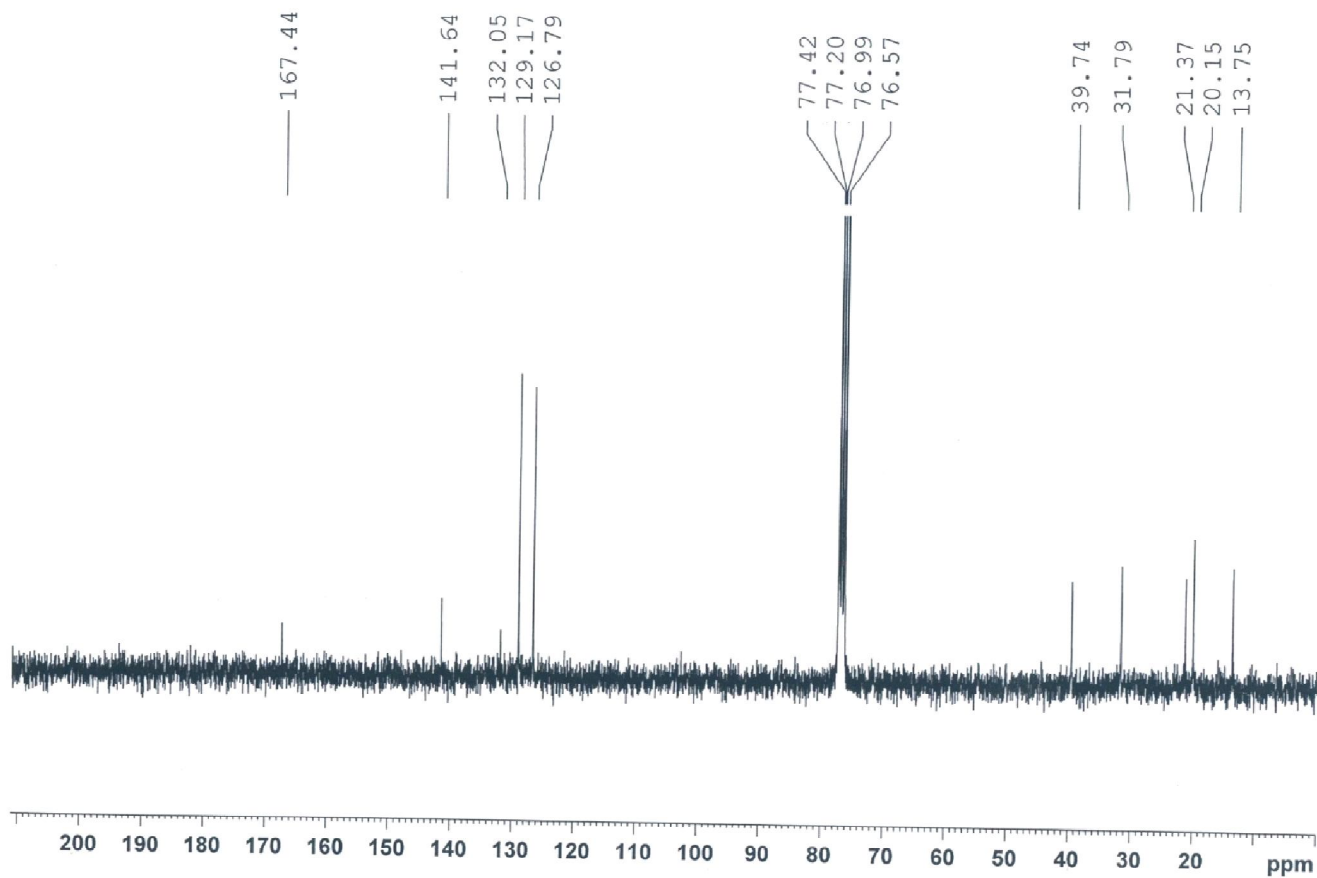



SI Figure 4:  $^1\text{H}$  and  $^{13}\text{C}$ -NMR spectra of compound **6d**

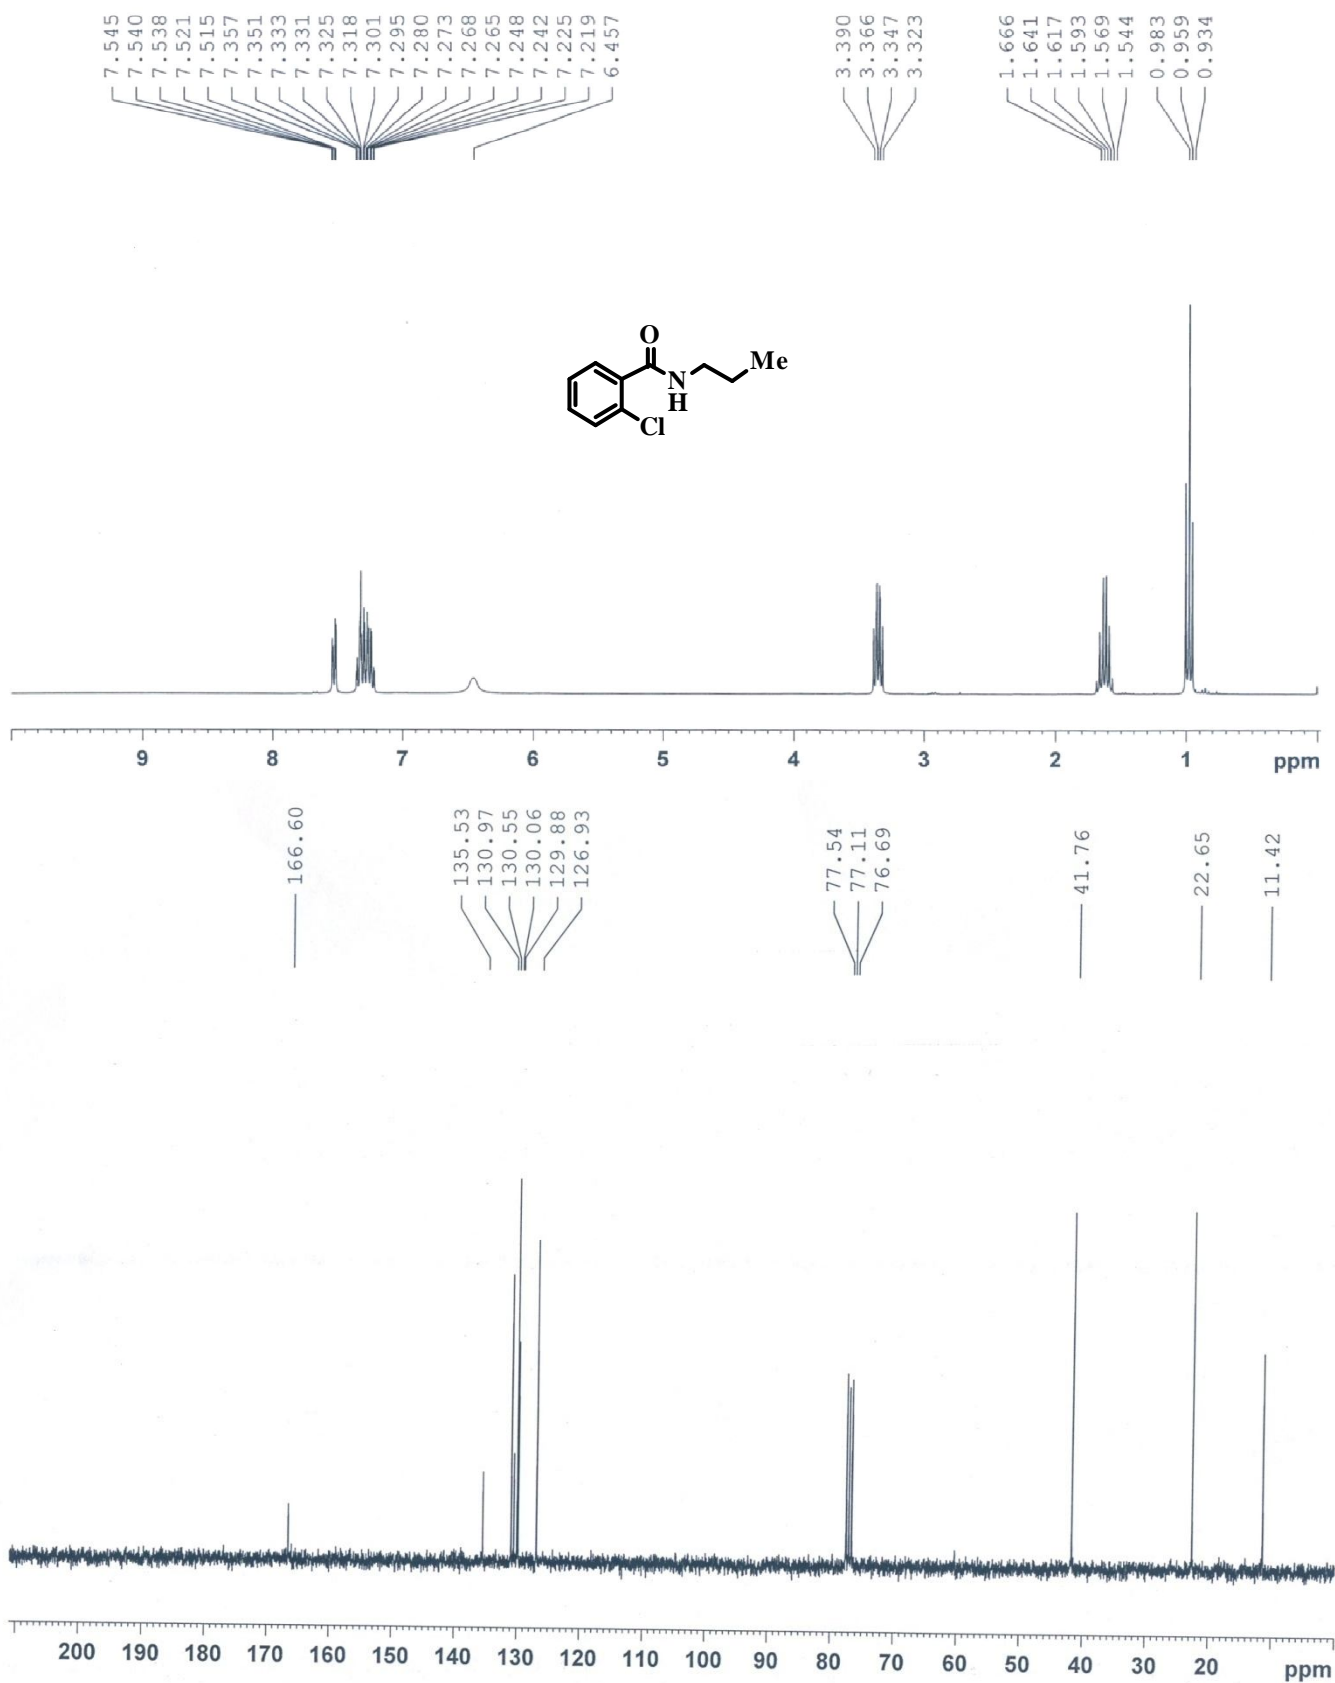

SI Figure 5:  $^1\text{H}$  and  $^{13}\text{C}$ -NMR spectra of compound **6e**

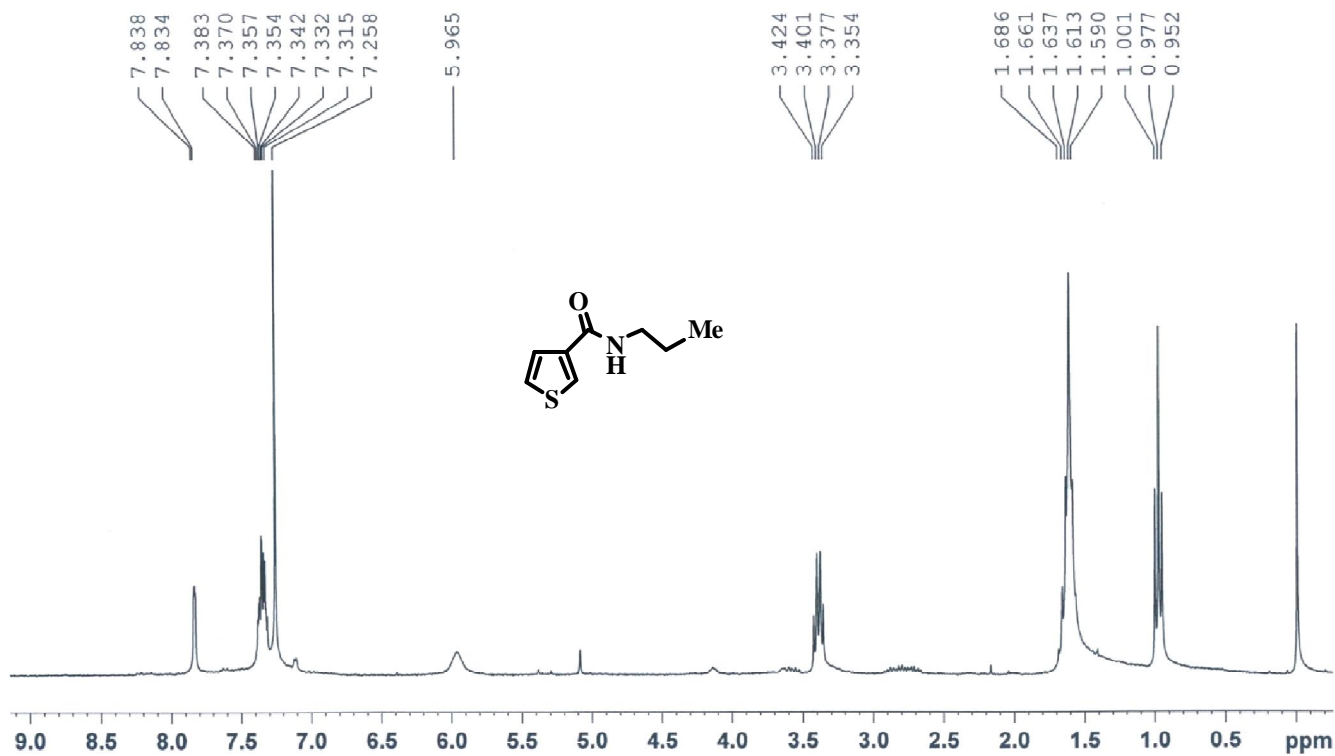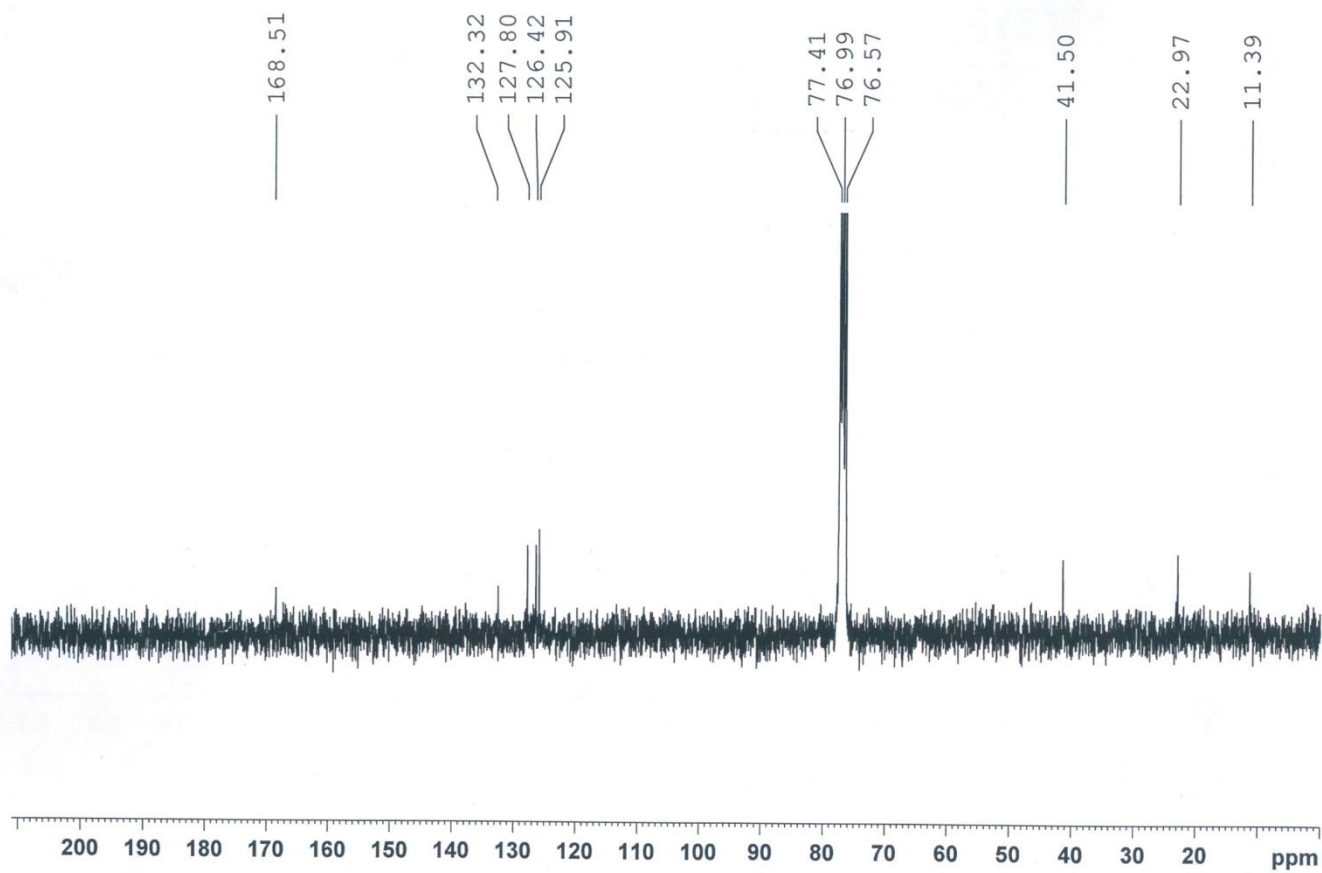

SI Figure 6:  $^1\text{H}$  and  $^{13}\text{C}$ -NMR spectra of compound **6f**

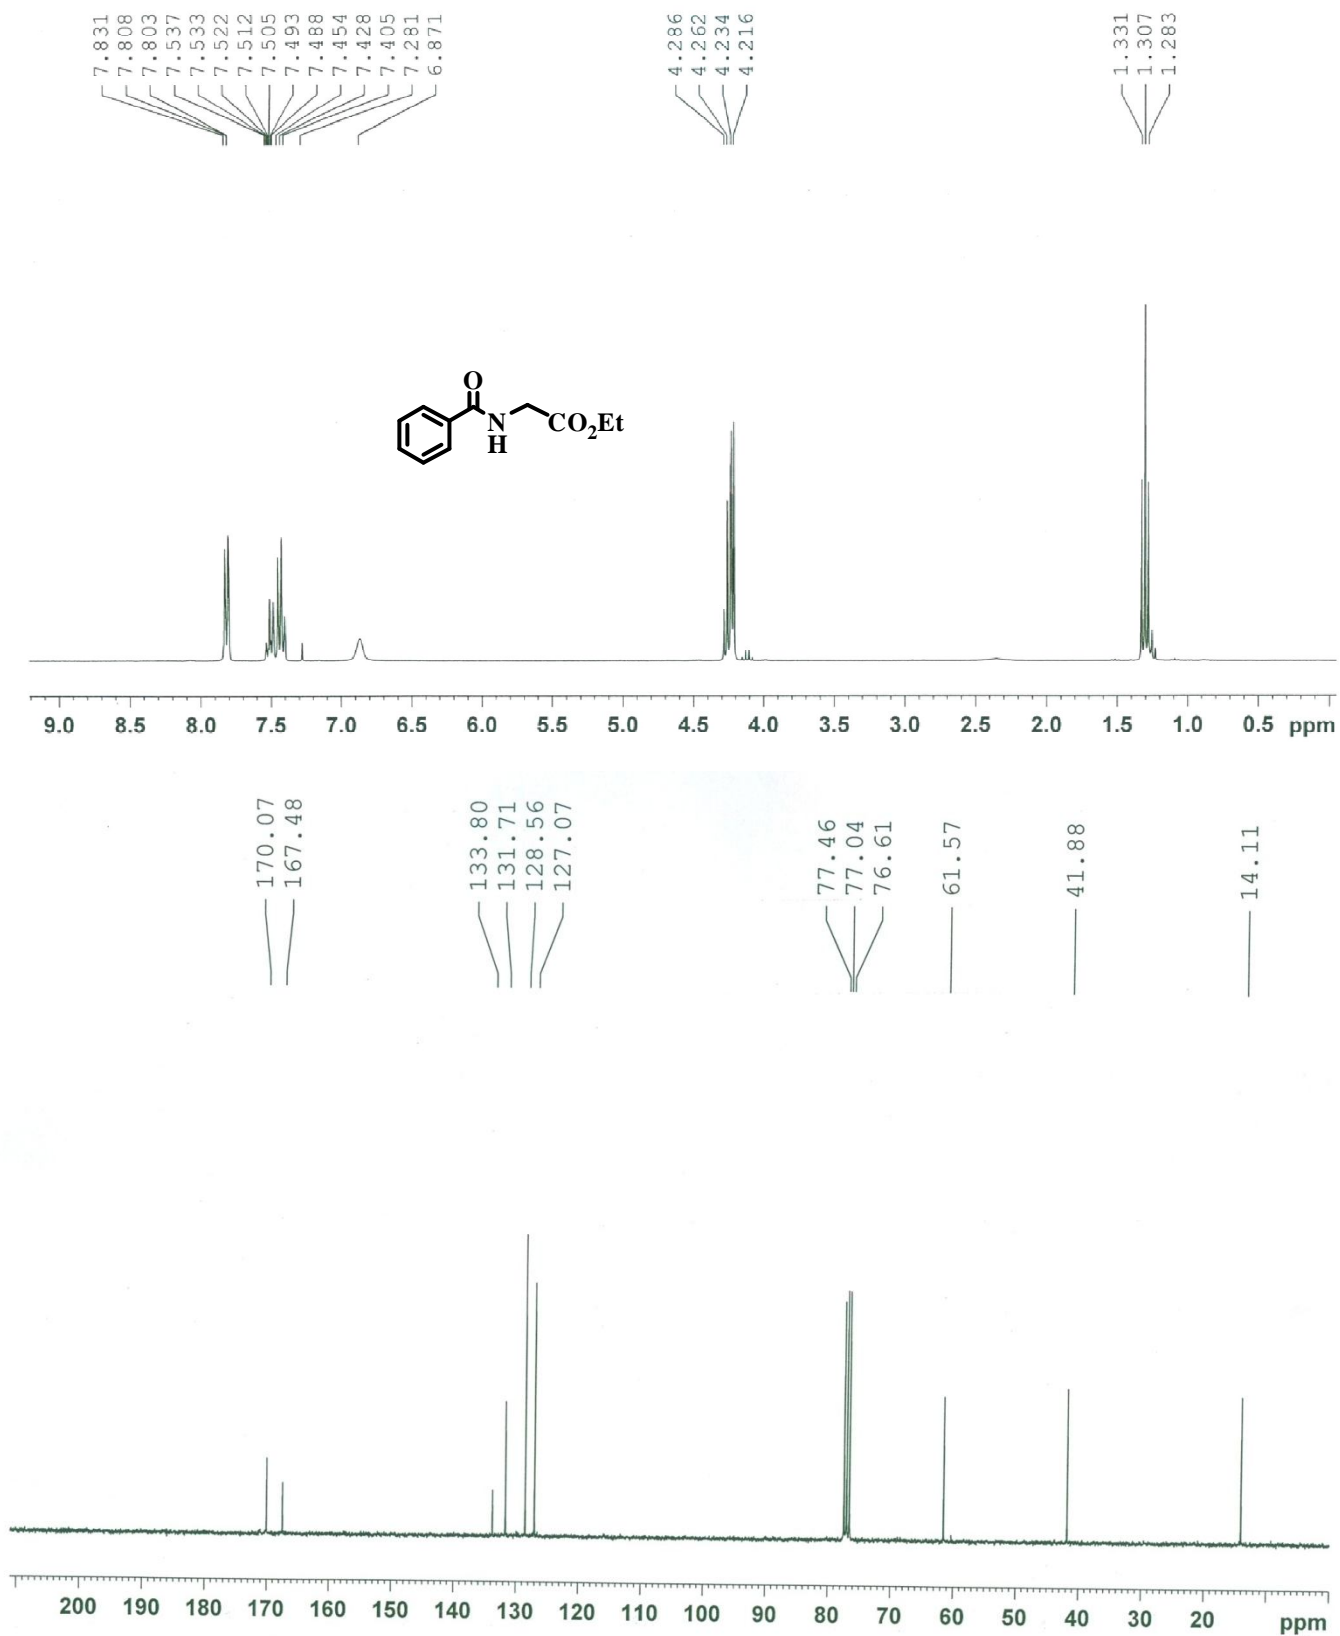

SI Figure 7:  $^1\text{H}$  and  $^{13}\text{C}$ -NMR spectra of compound **6g**

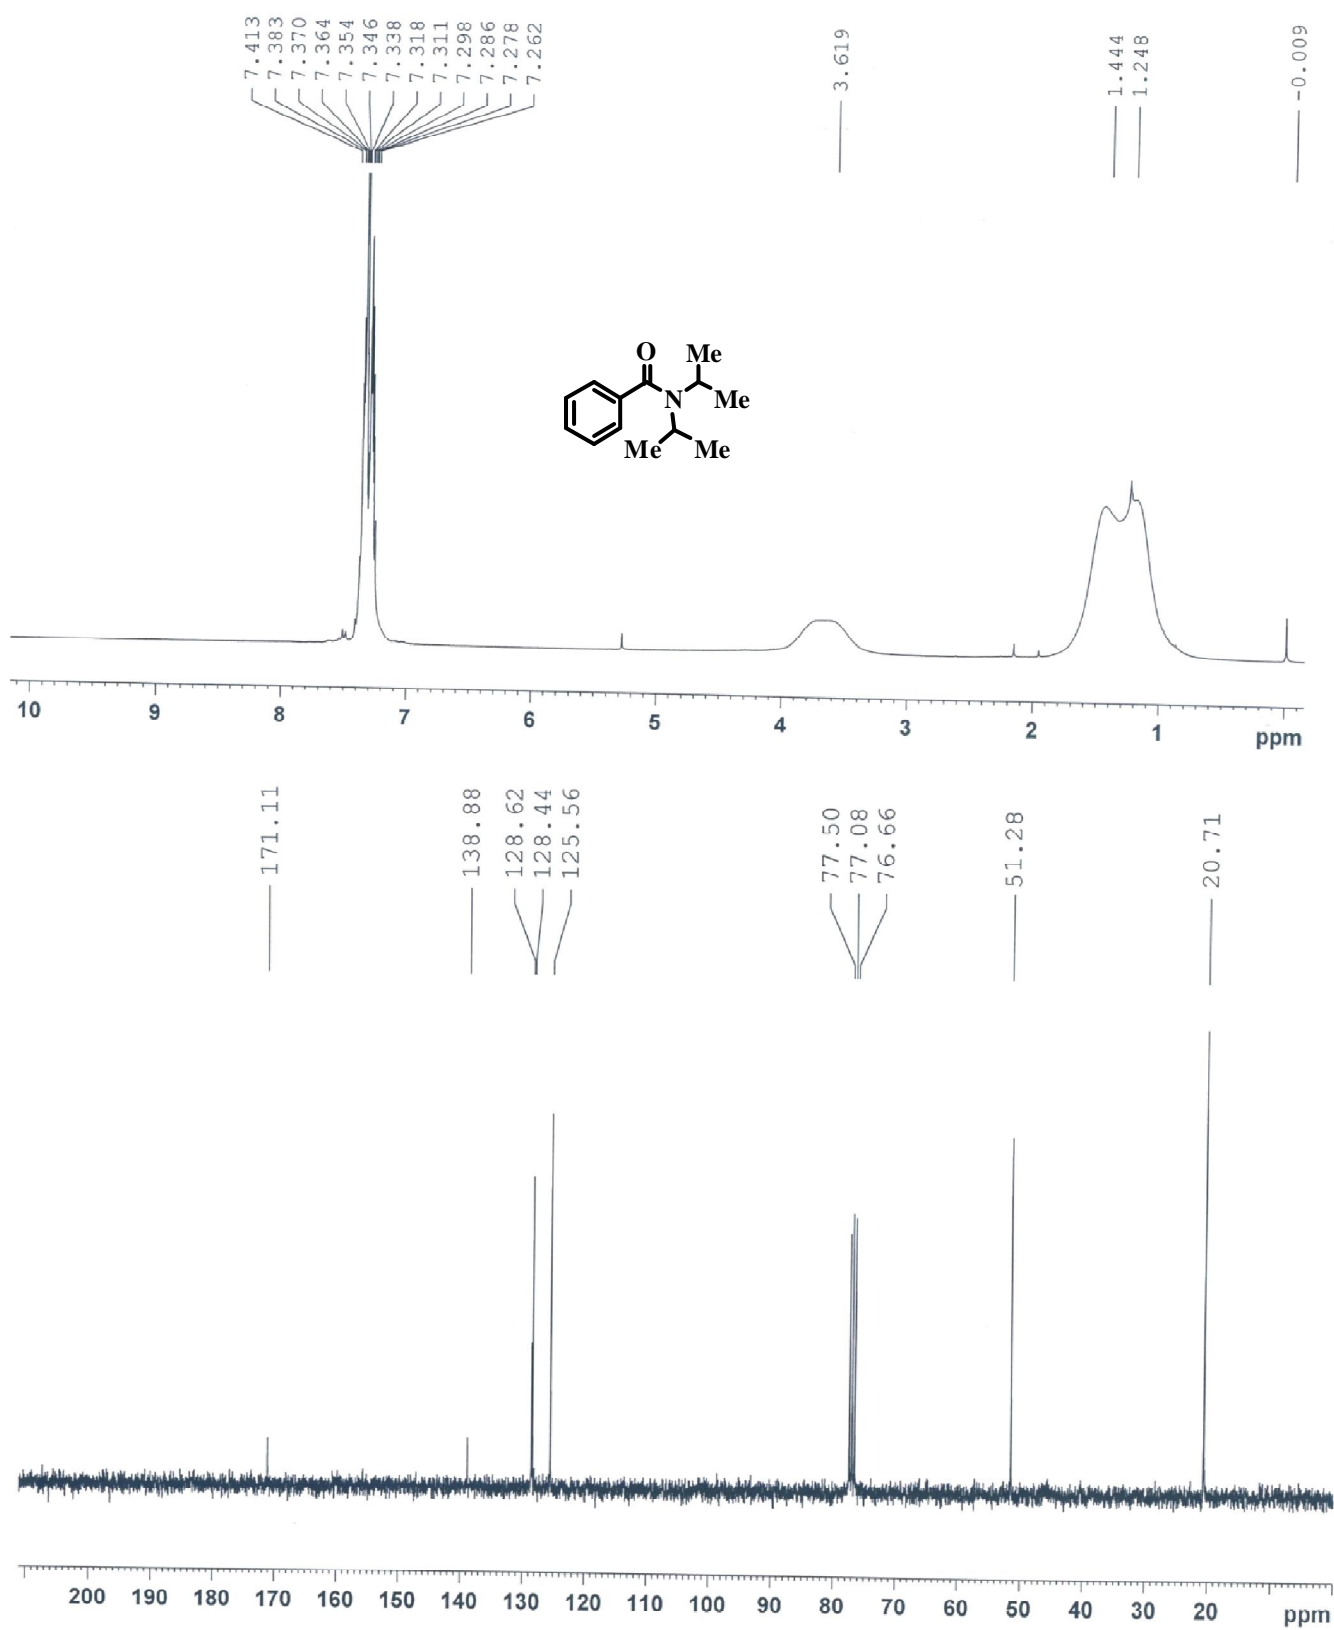

SI Figure 8:  $^1\text{H}$  and  $^{13}\text{C}$ -NMR spectra of compound **6h**

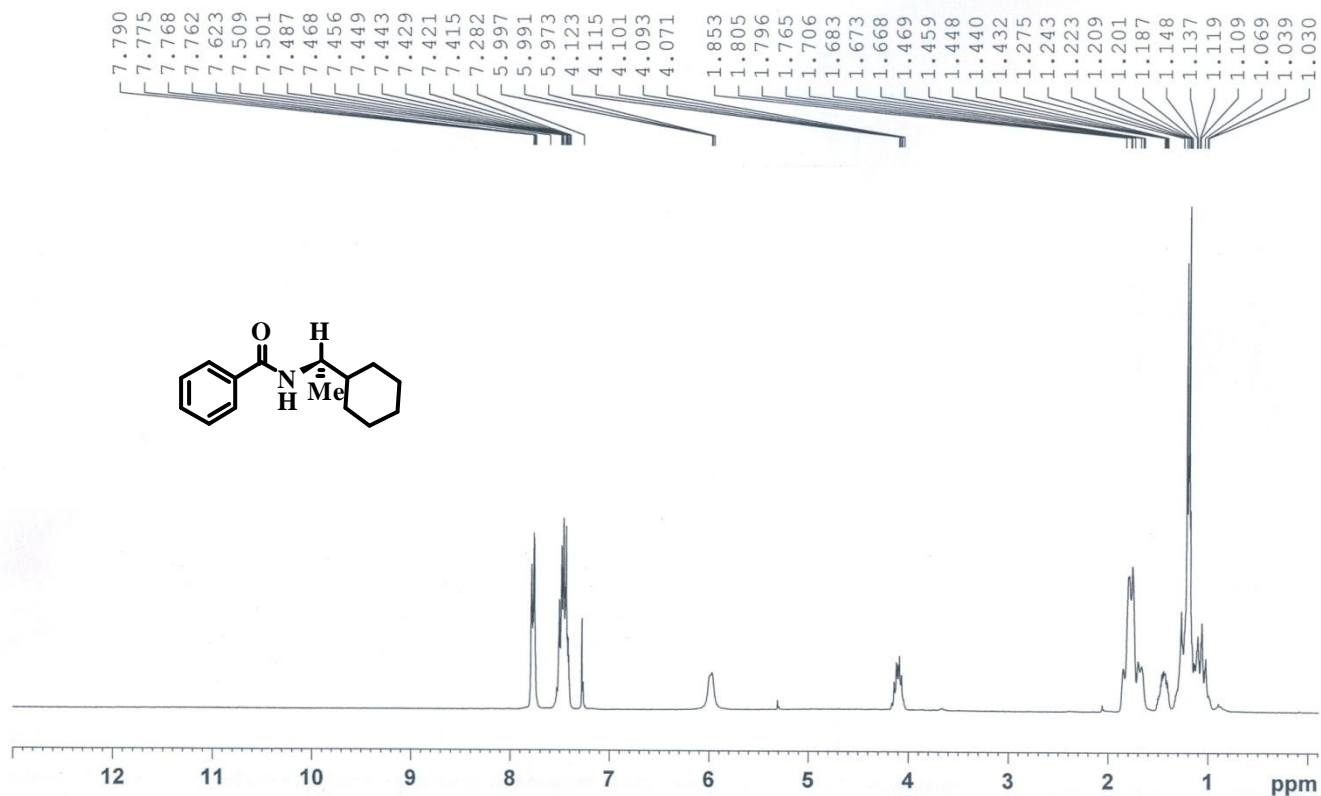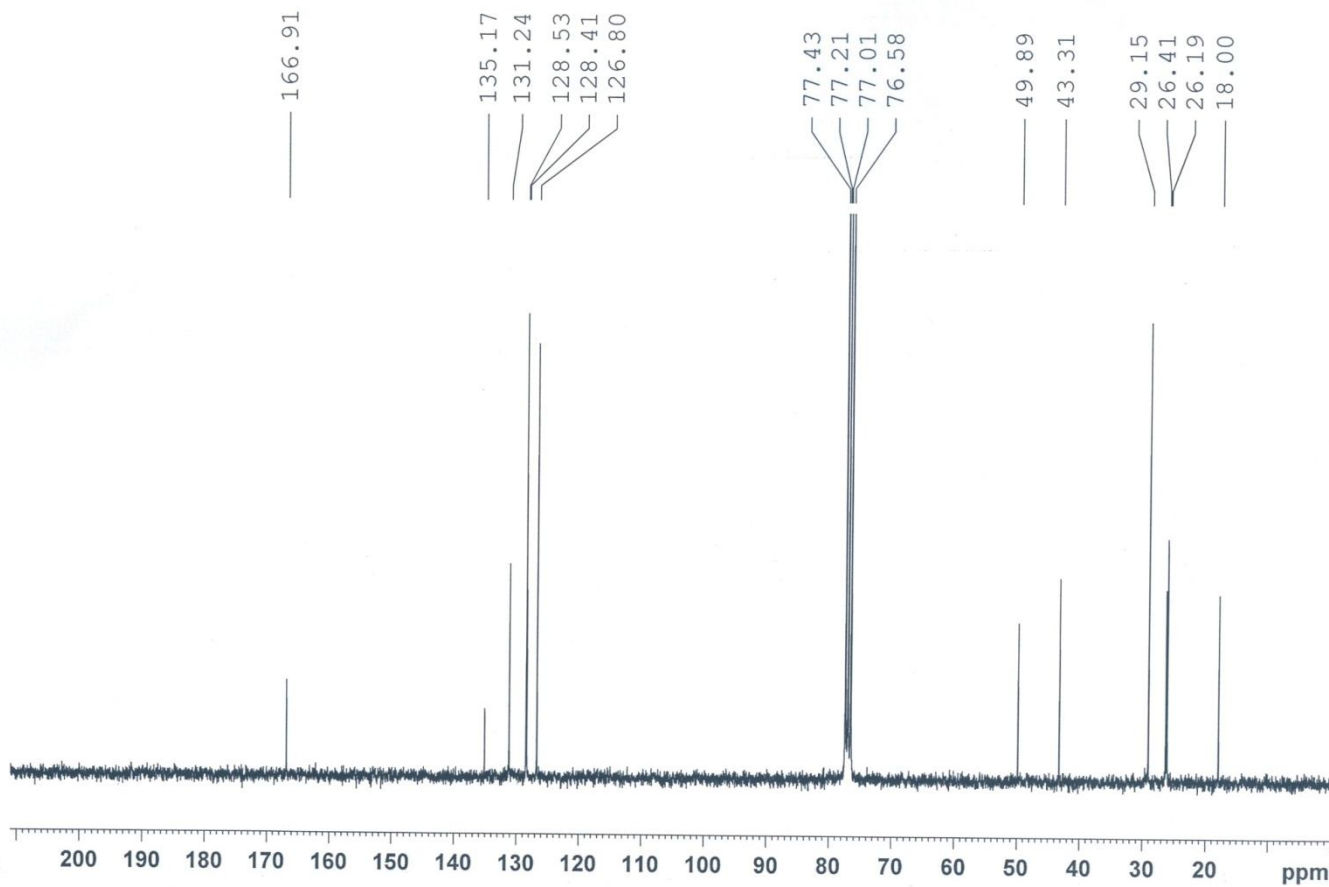

SI Figure 9:  $^1\text{H}$  and  $^{13}\text{C}$ -NMR spectra of compound **6i**

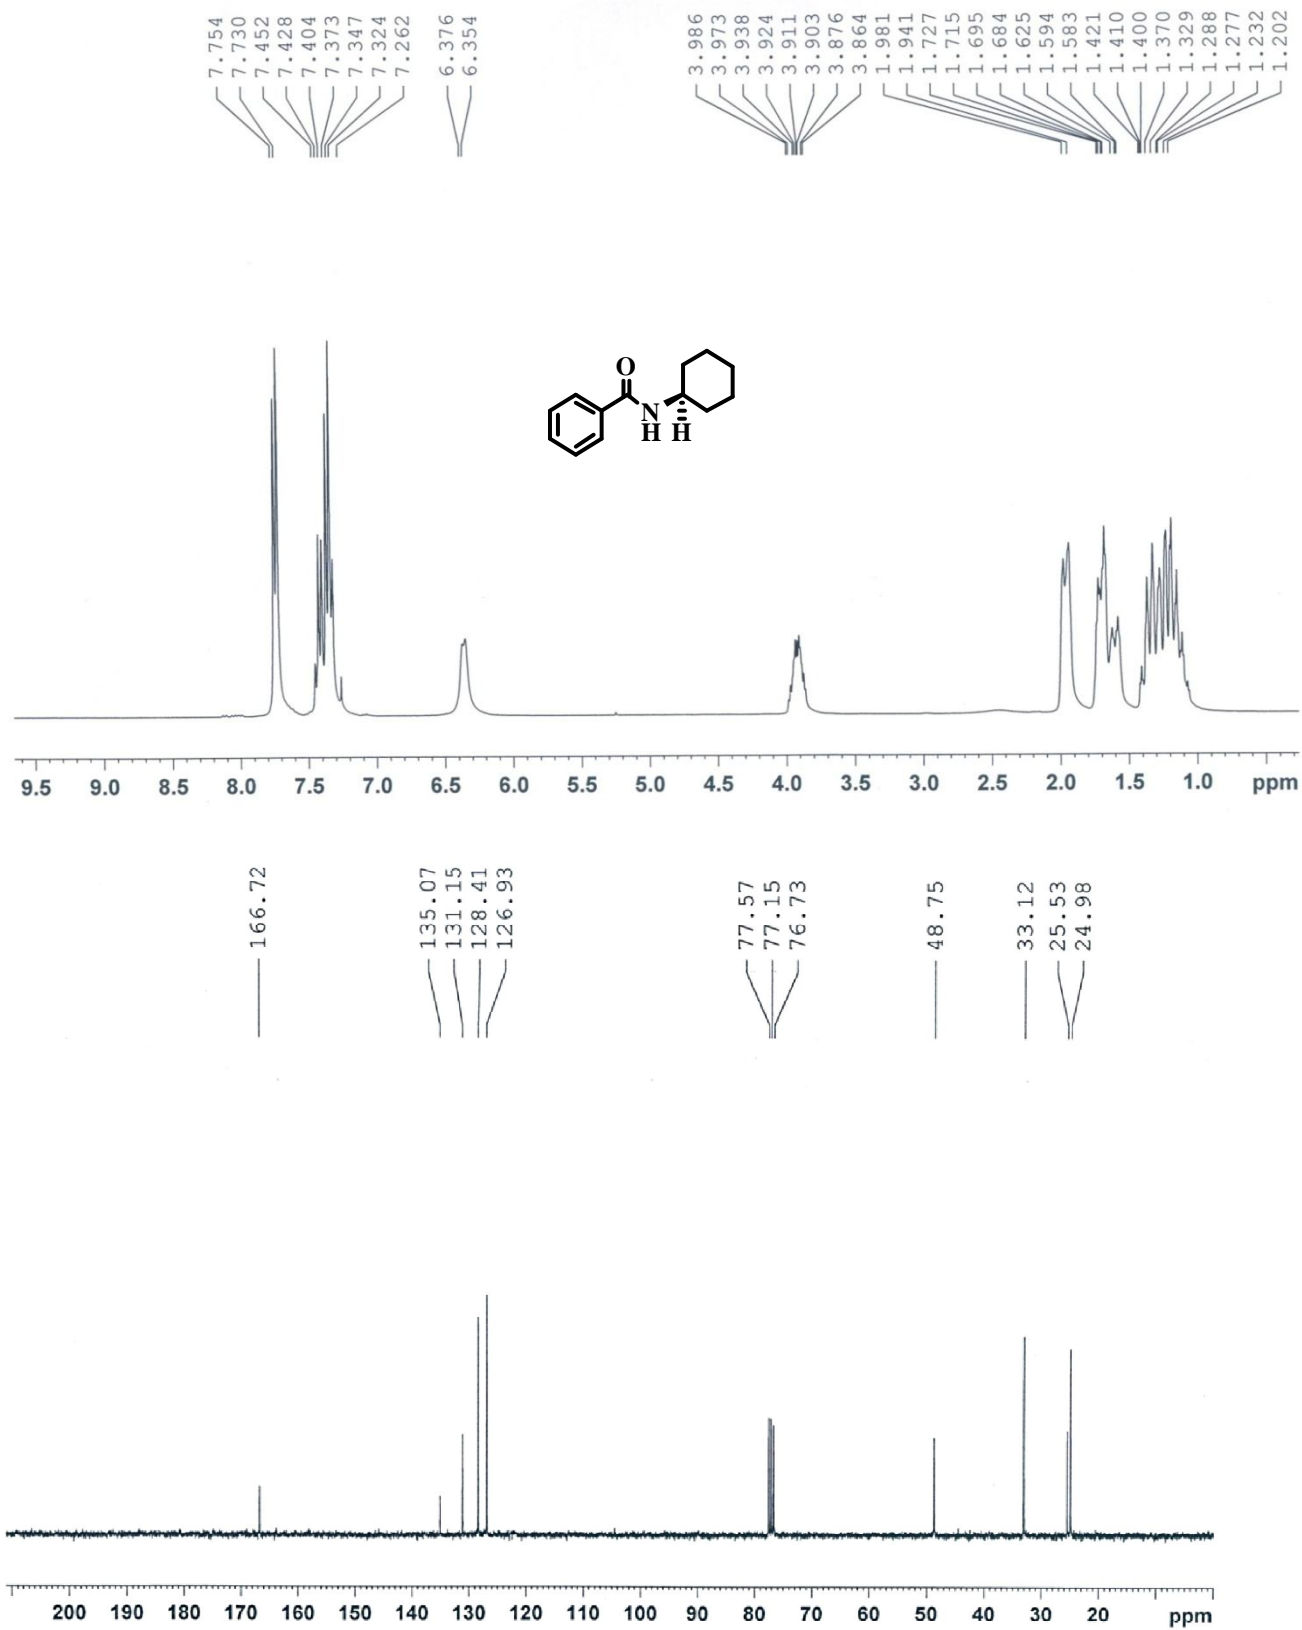

SI Figure 10:  $^1\text{H}$  and  $^{13}\text{C}$ -NMR spectra of compound **6j**

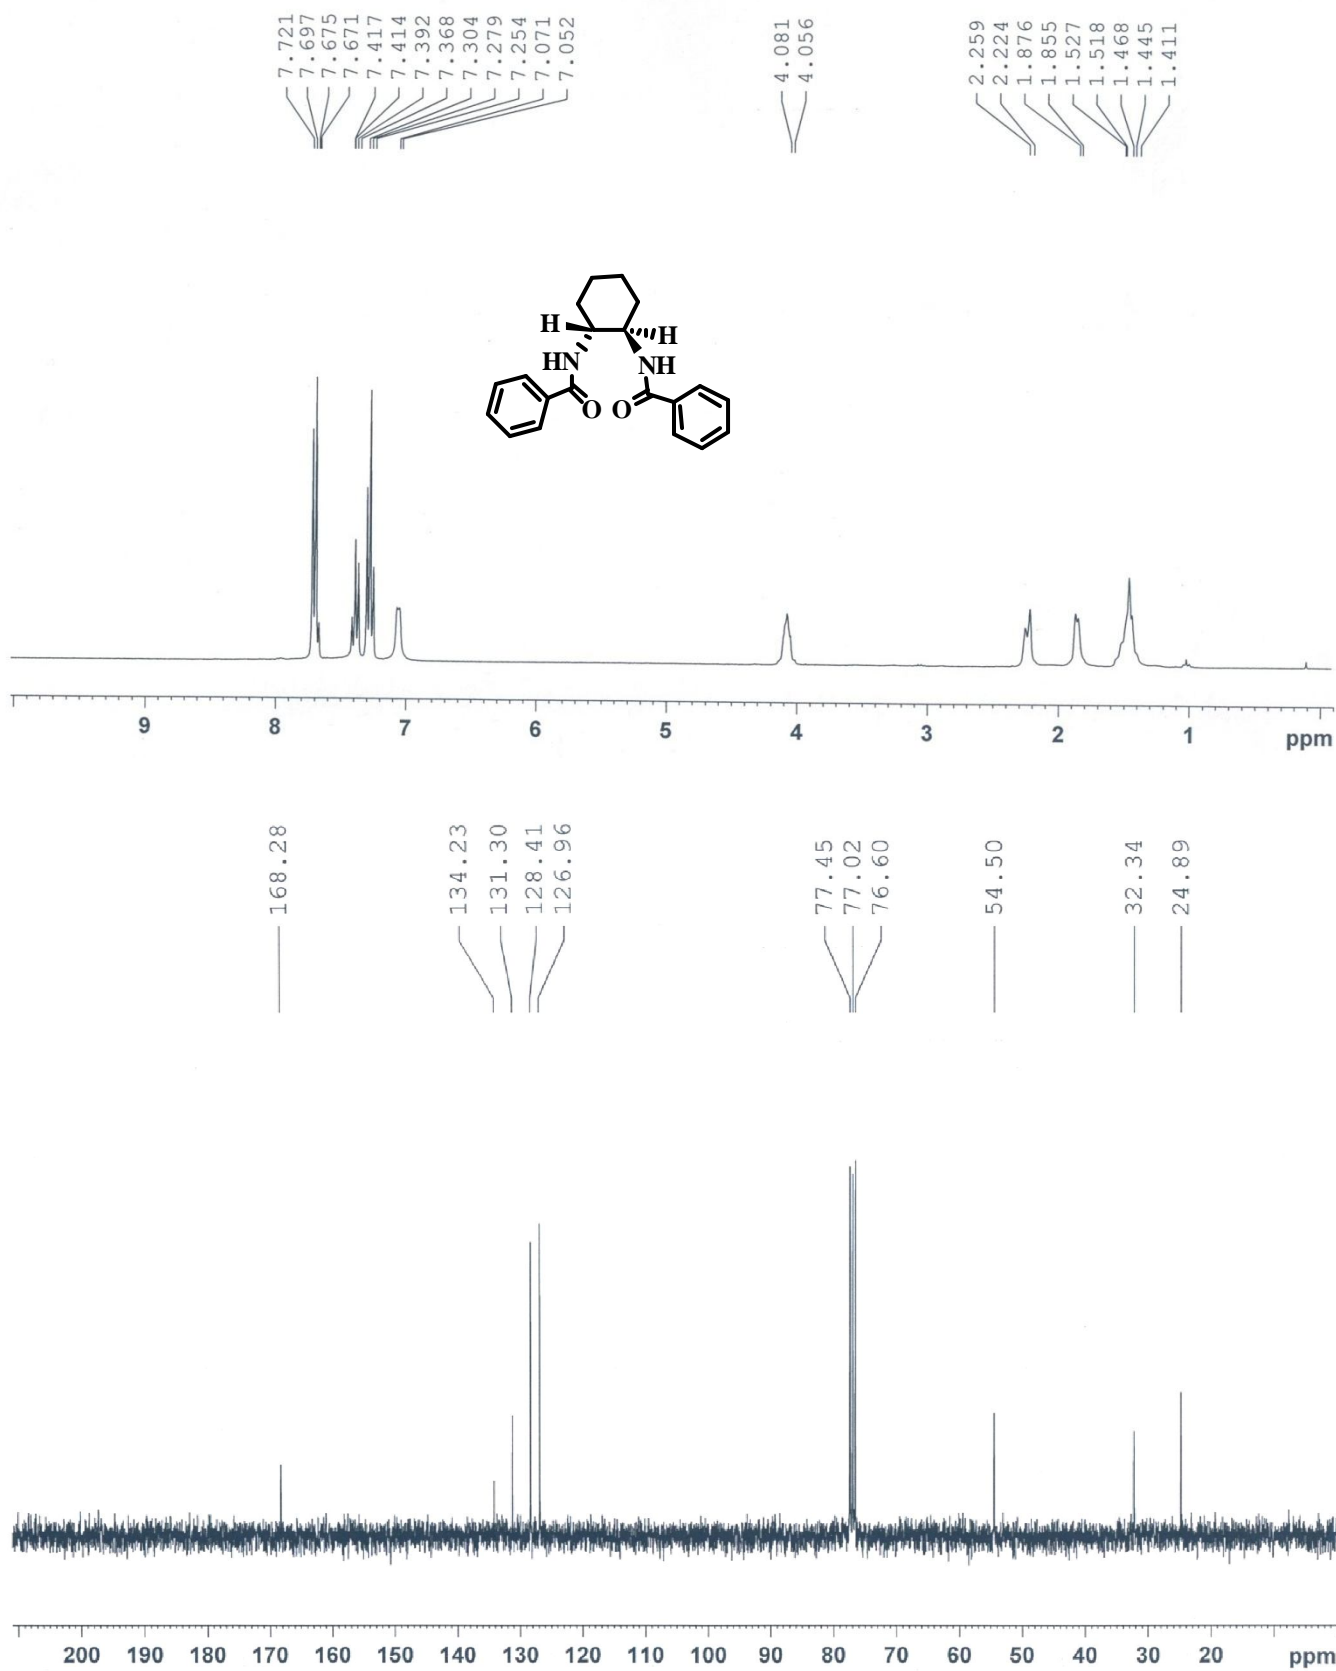

SI Figure 11:  $^1\text{H}$  and  $^{13}\text{C}$ -NMR spectra of compound 6k

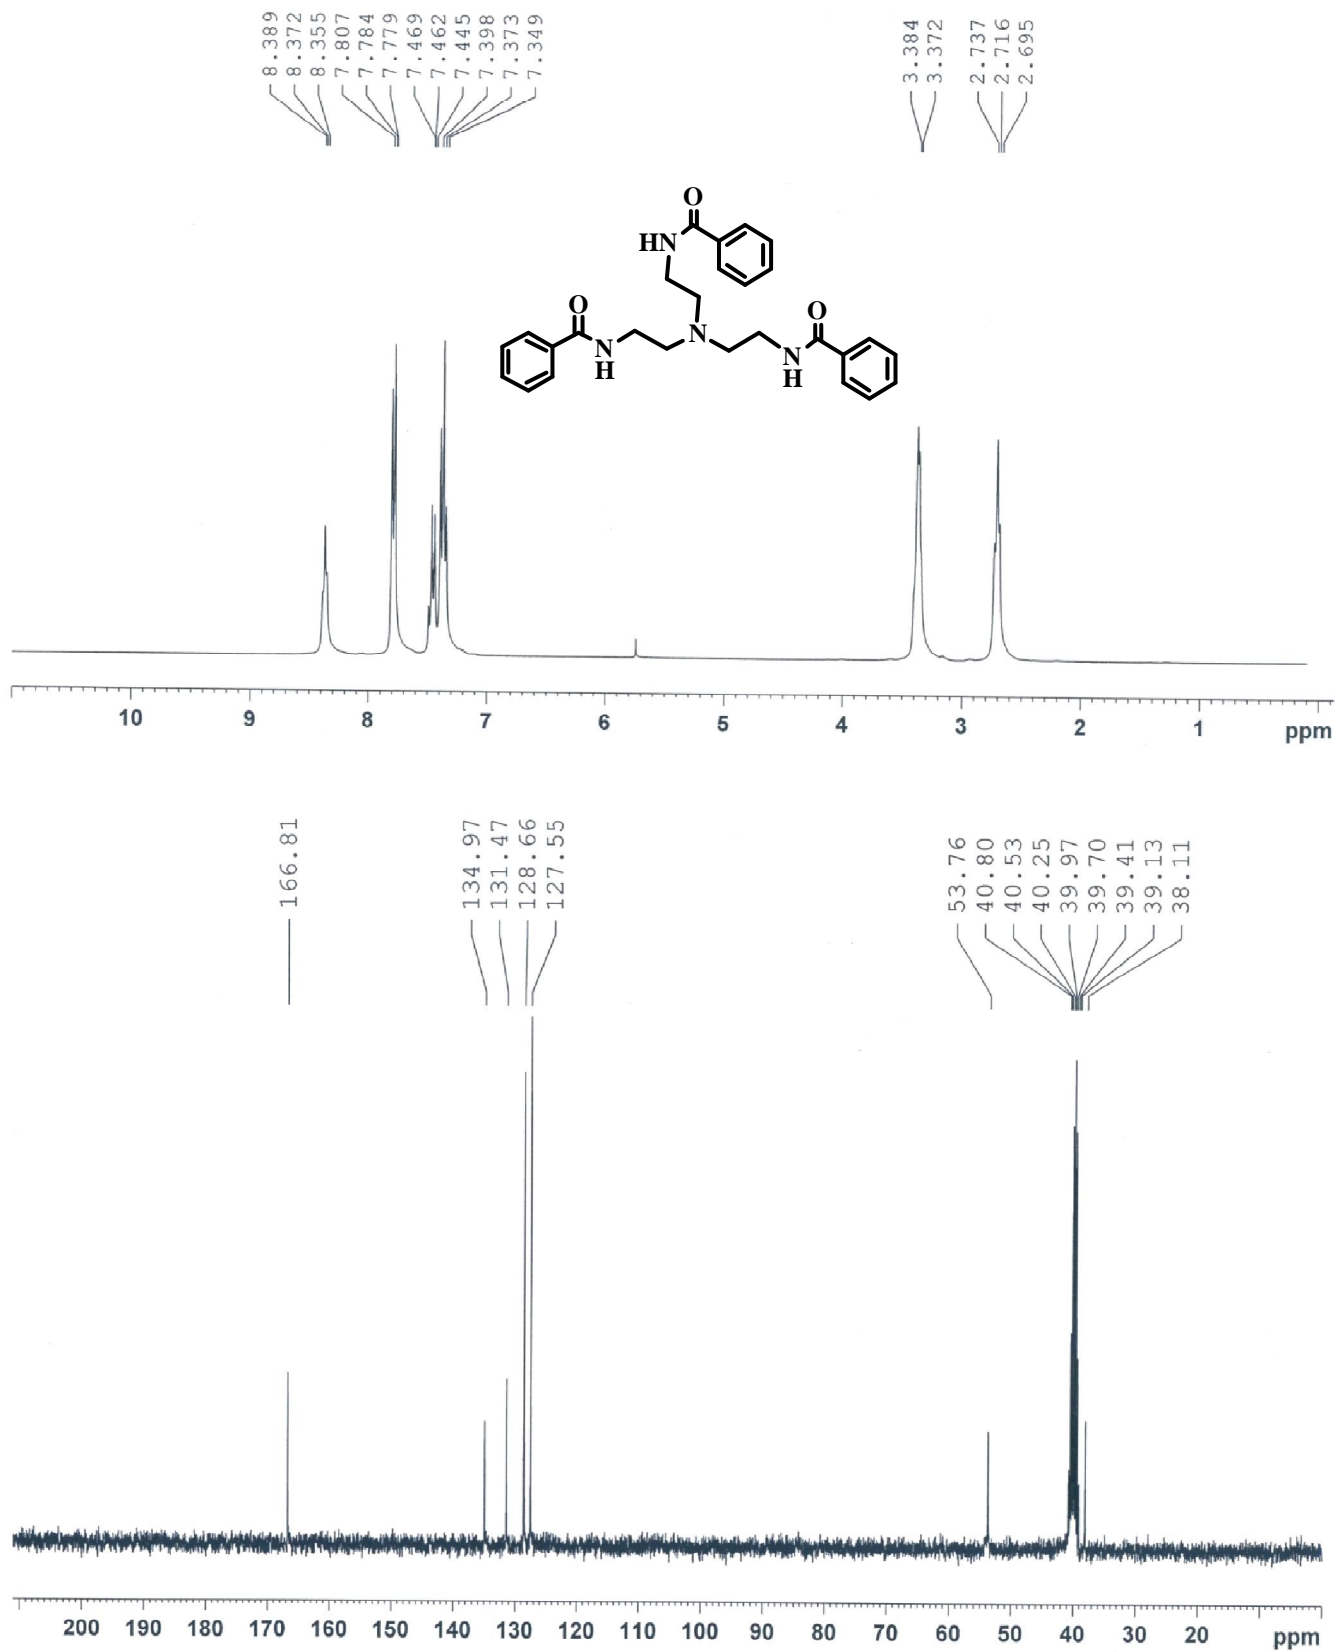



SI Figure 12:  $^1\text{H}$  and  $^{13}\text{C}$  and DEPT-135 NMR spectra of compound **6l**

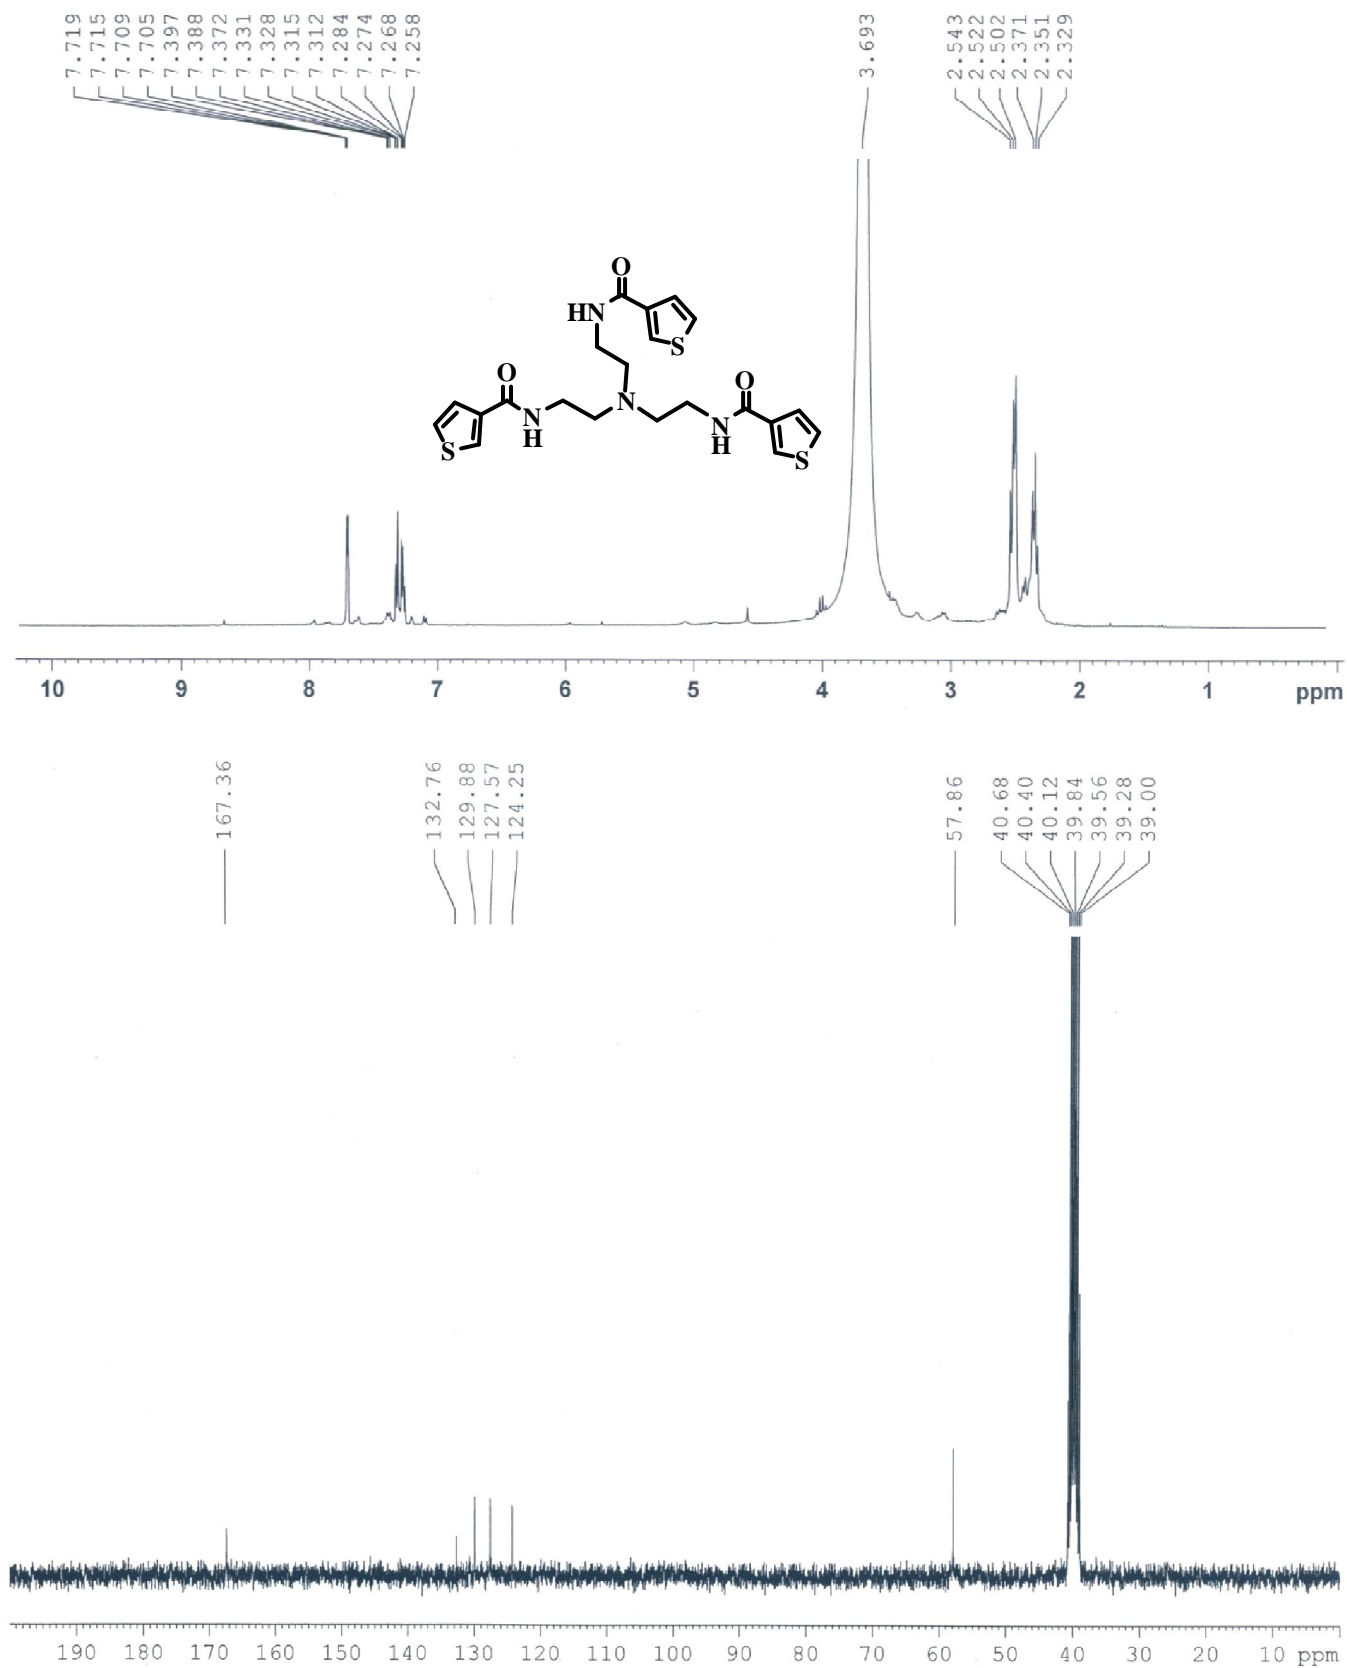

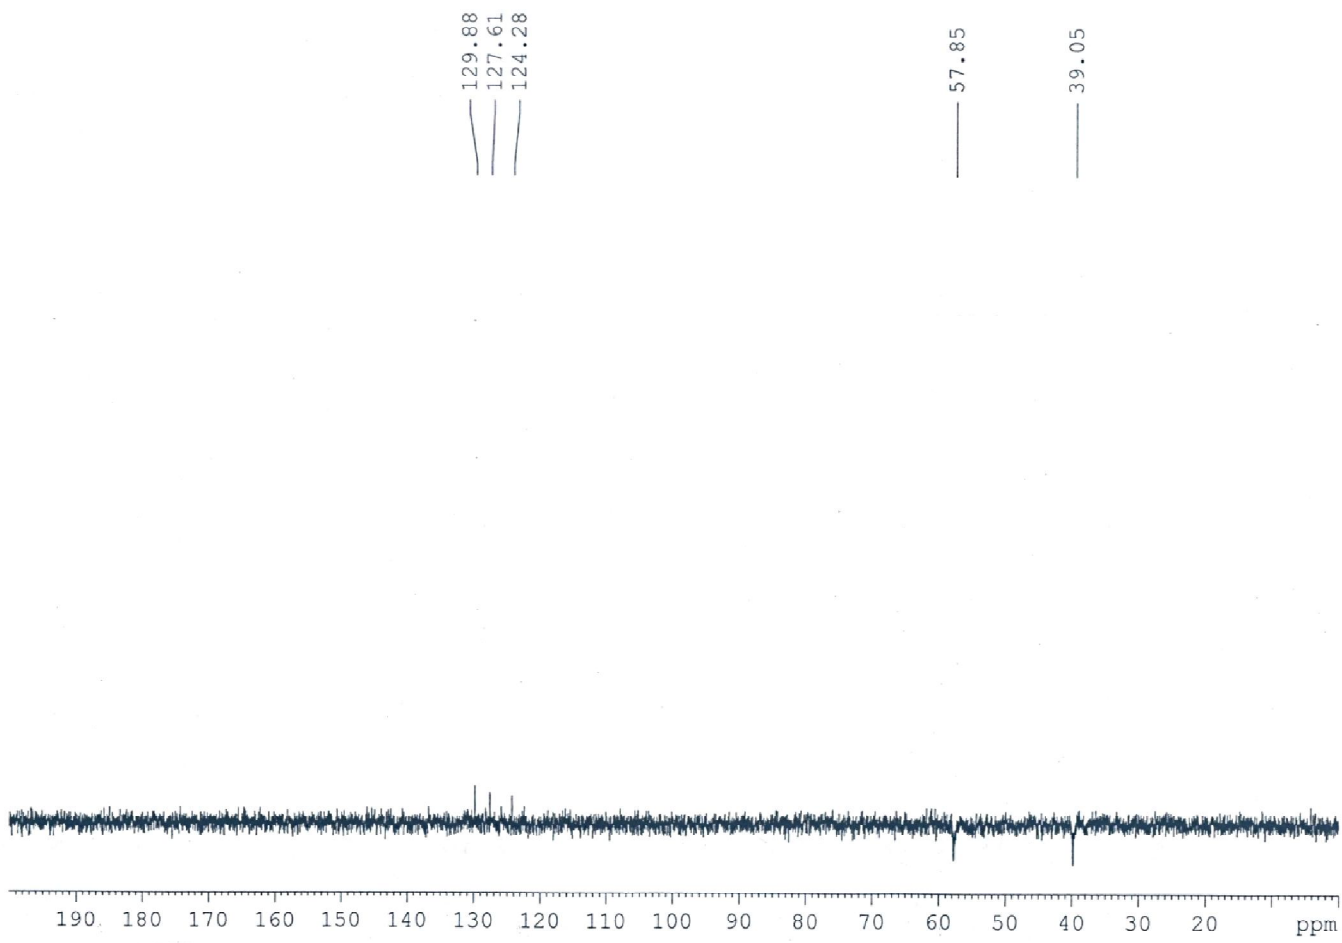

SI Figure 13:  $^1\text{H}$  and  $^{13}\text{C}$ -NMR spectra of compound **6m**

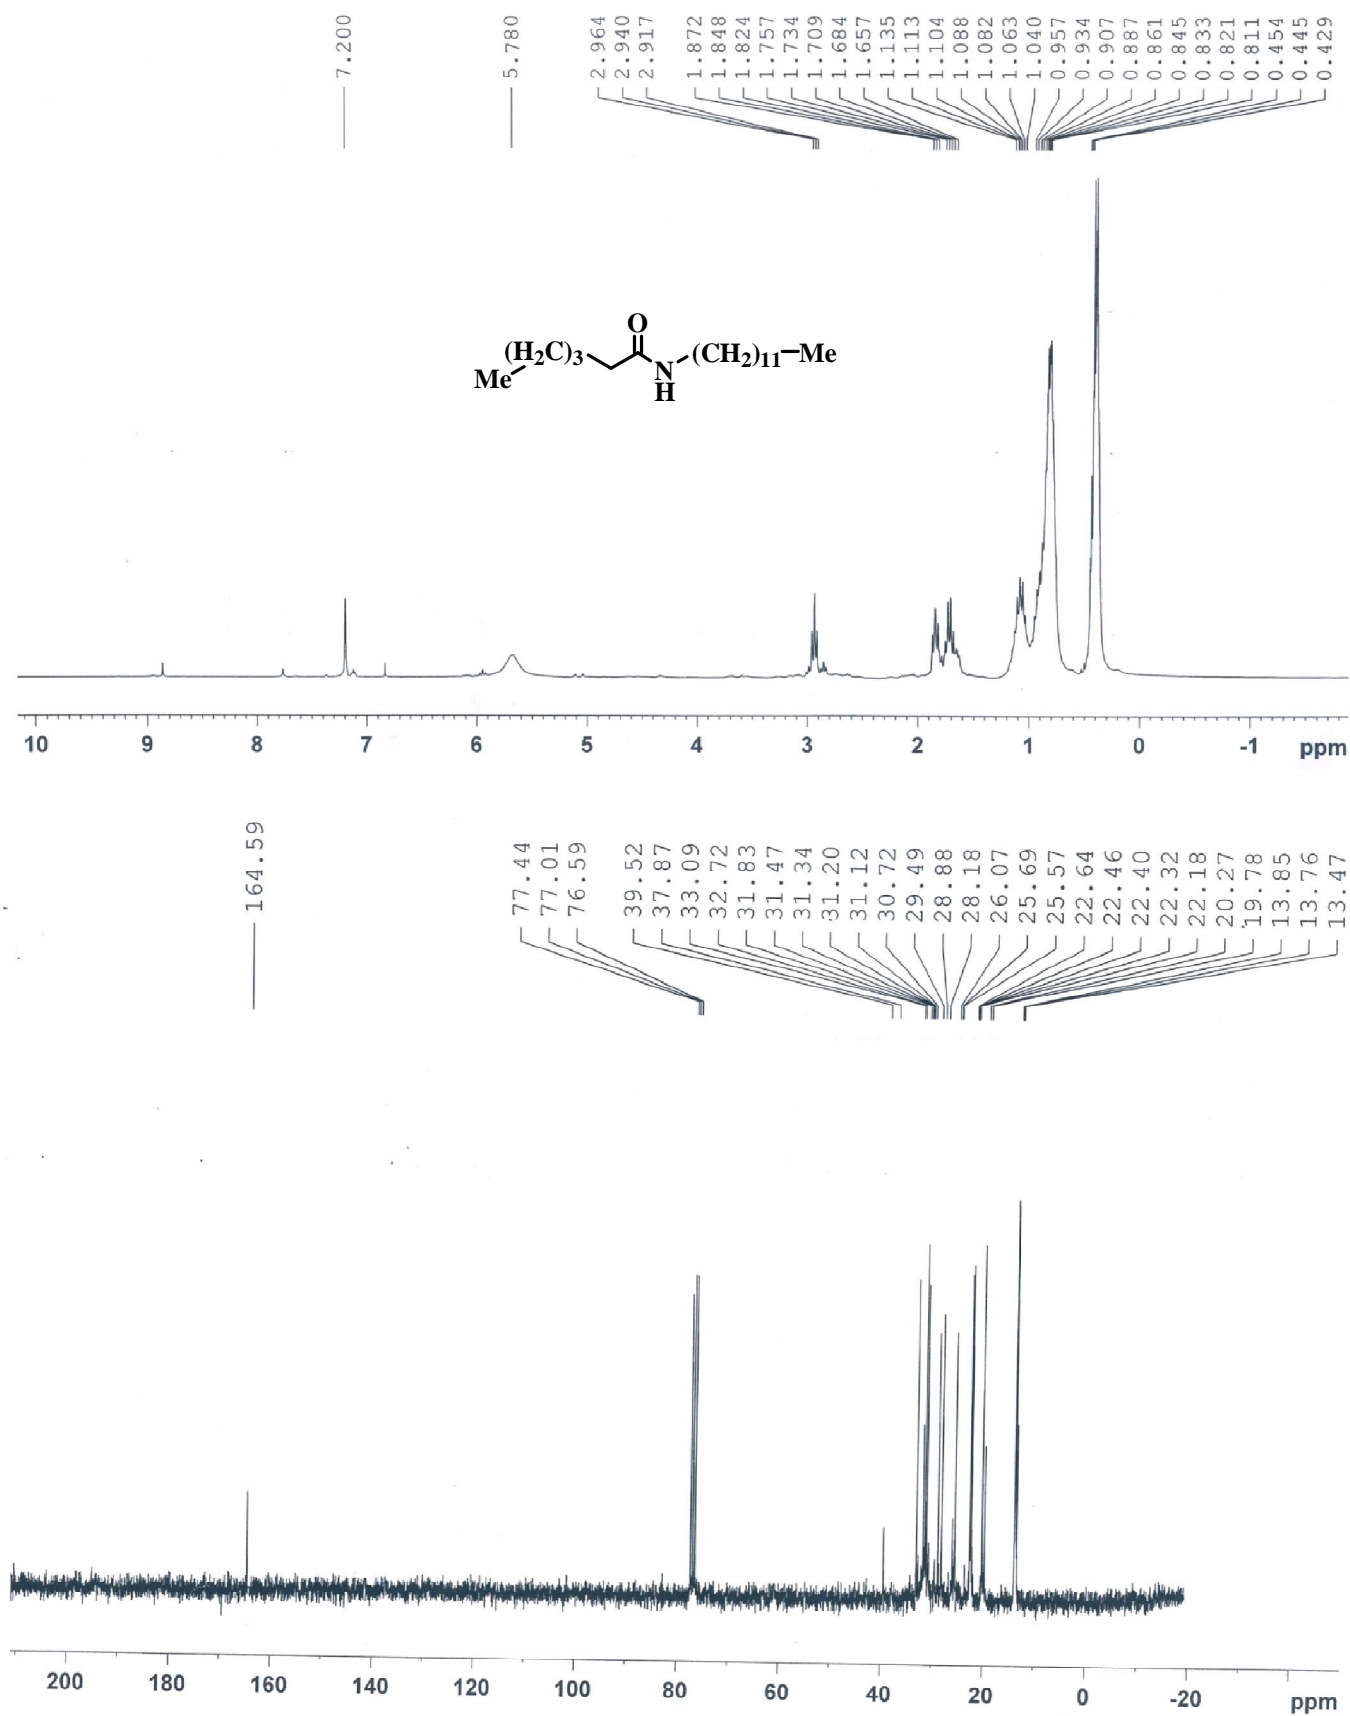

SI Figure 14:  $^1\text{H}$  and  $^{13}\text{C}$ -NMR spectra of compound **8a**

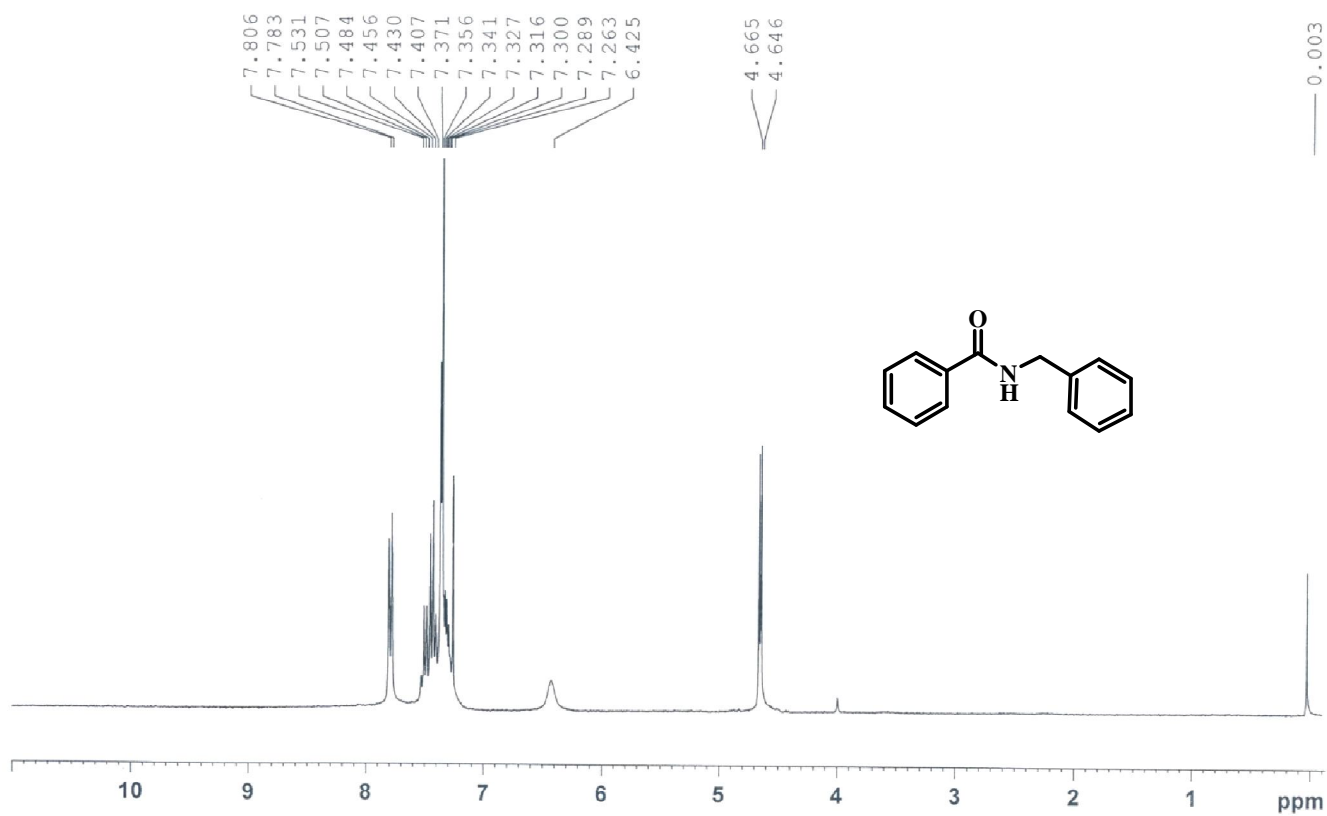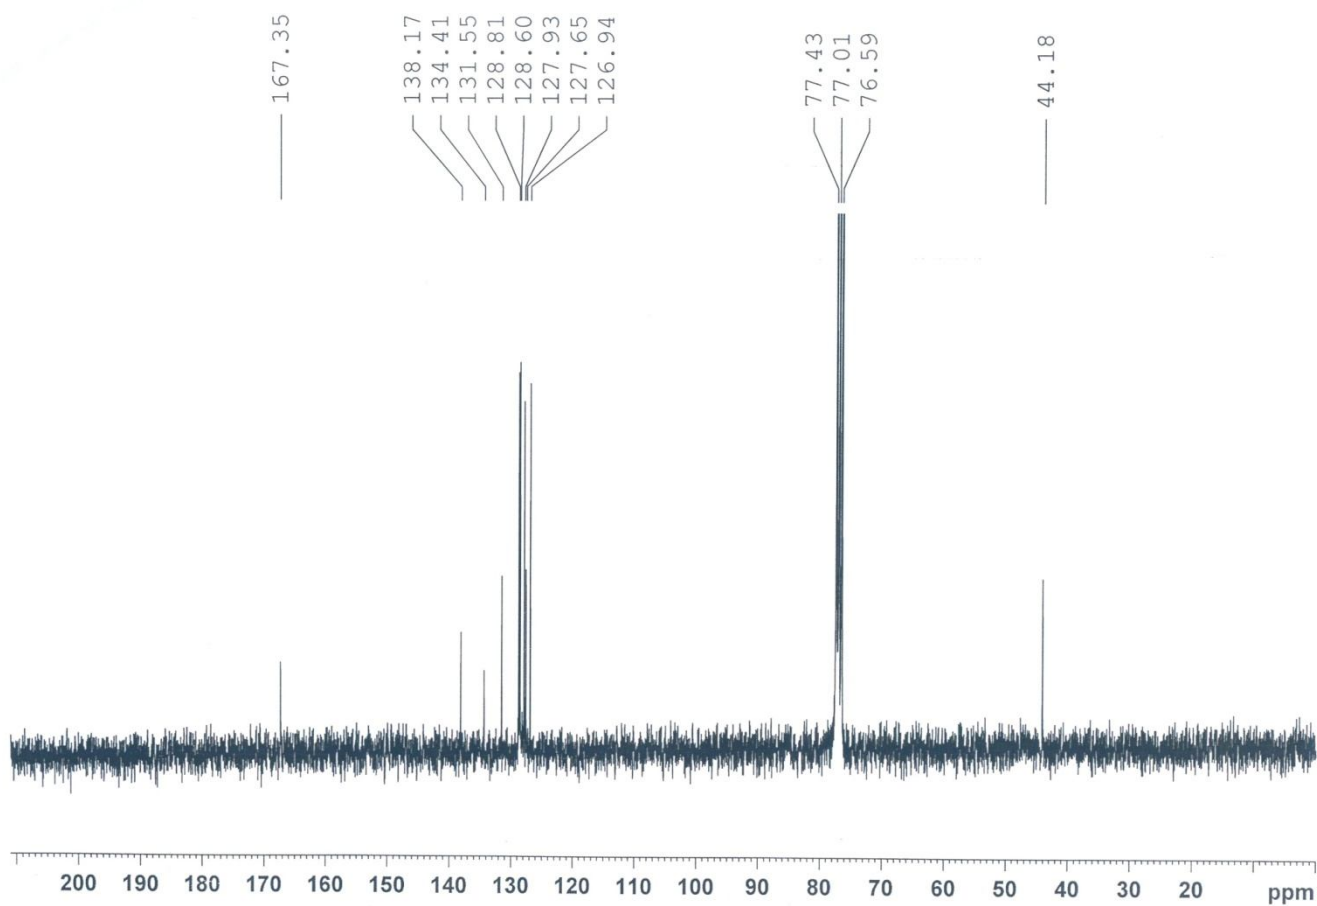

SI Figure 15:  $^1\text{H}$  and  $^{13}\text{C}$ -NMR spectra of compound **8b**

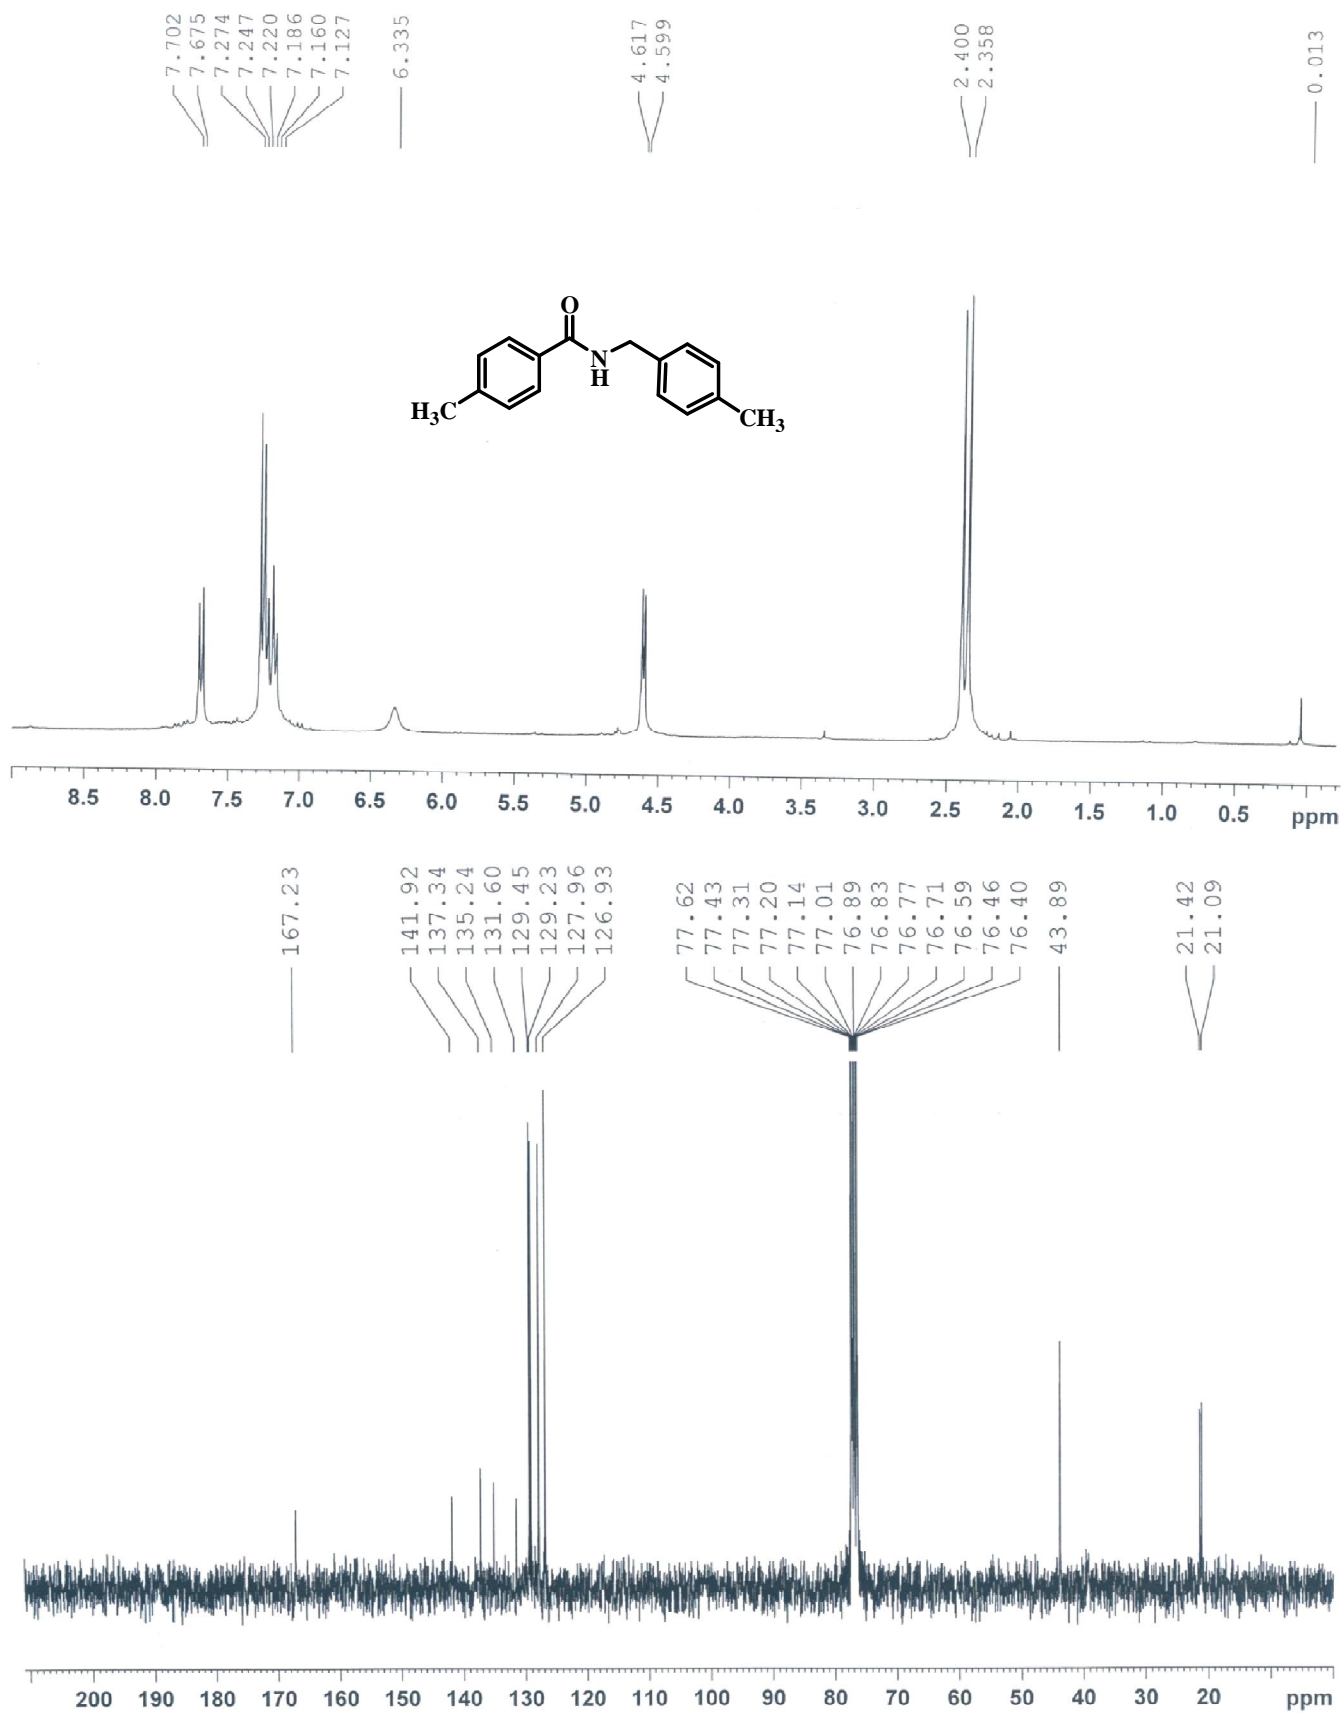

SI Figure 16:  $^1\text{H}$  and  $^{13}\text{C}$ -NMR spectra of compound **8c**

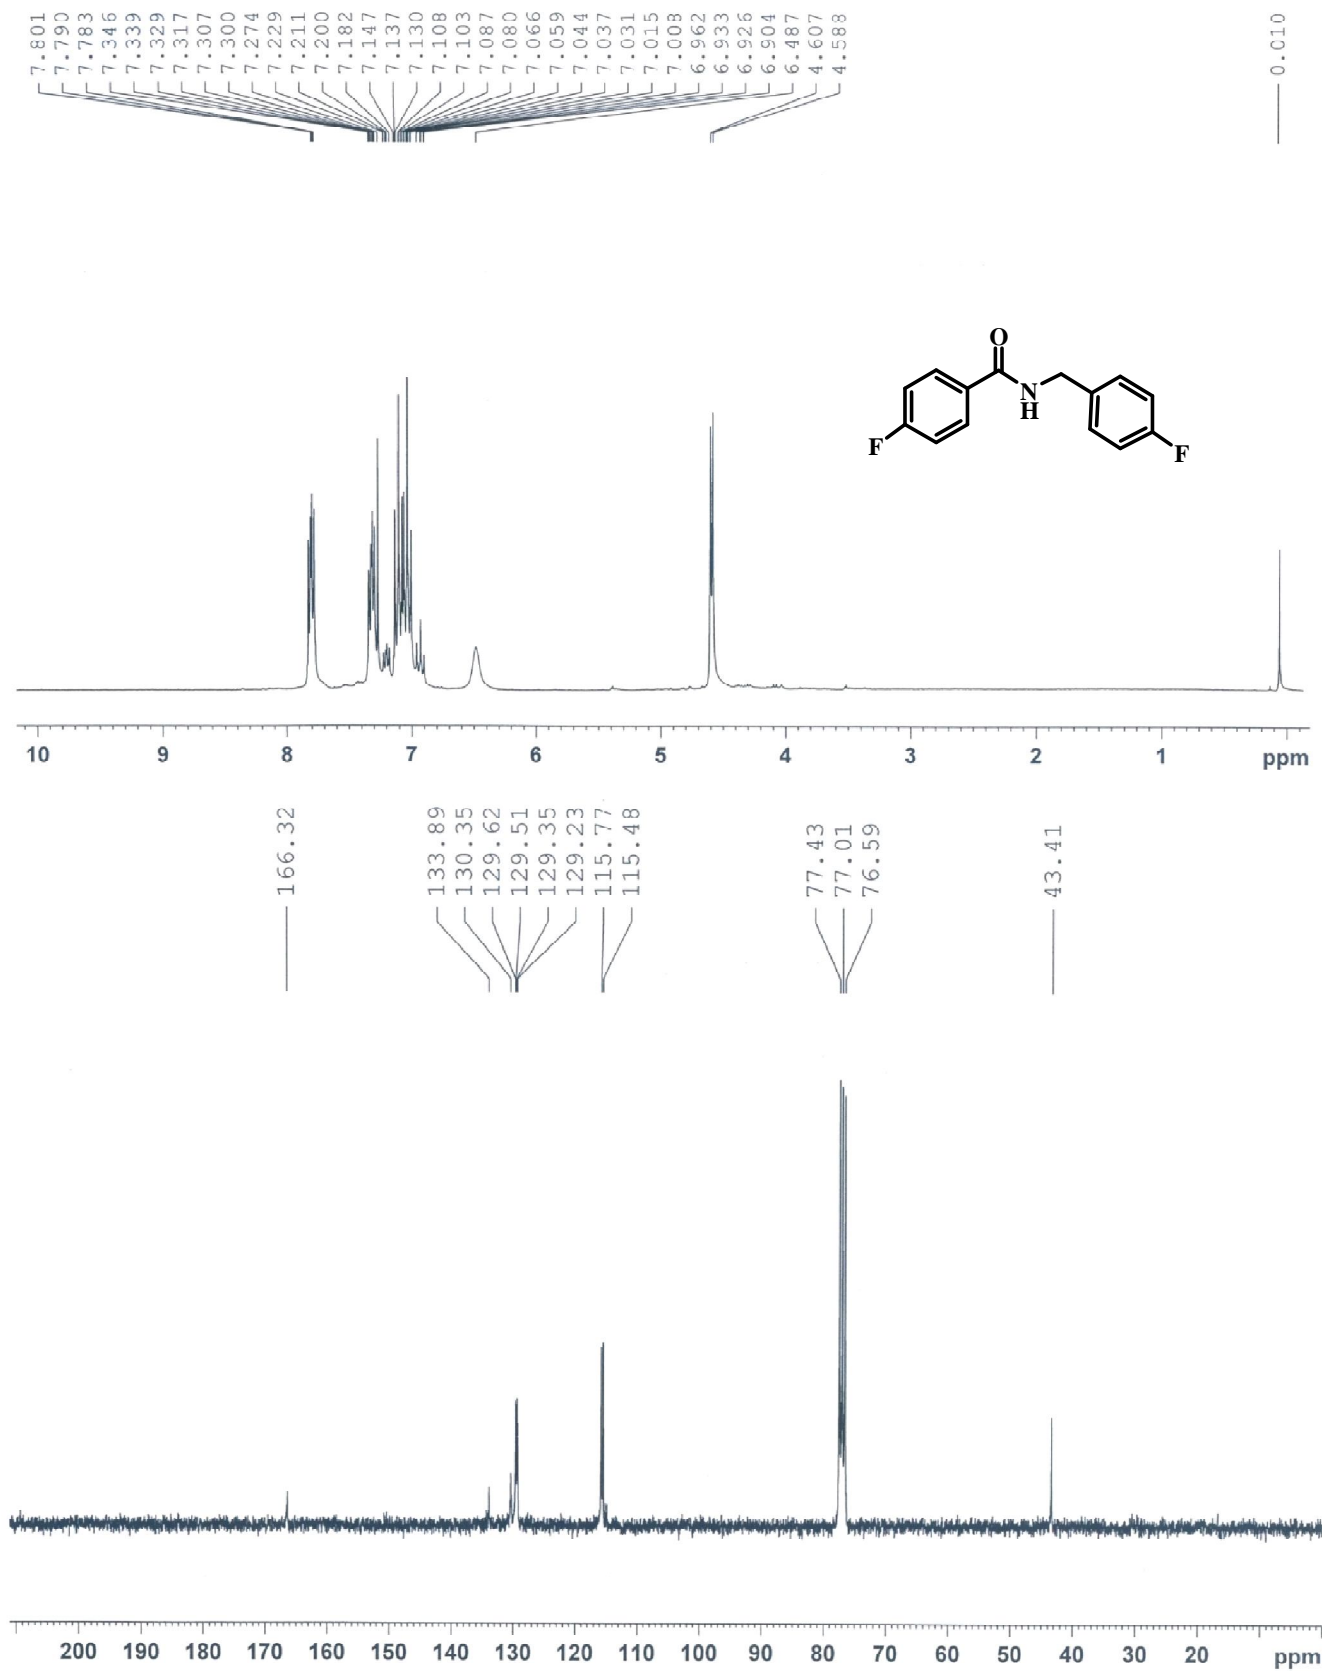

SI Figure 17:  $^1\text{H}$  and  $^{13}\text{C}$ -NMR spectra of compound **8d**

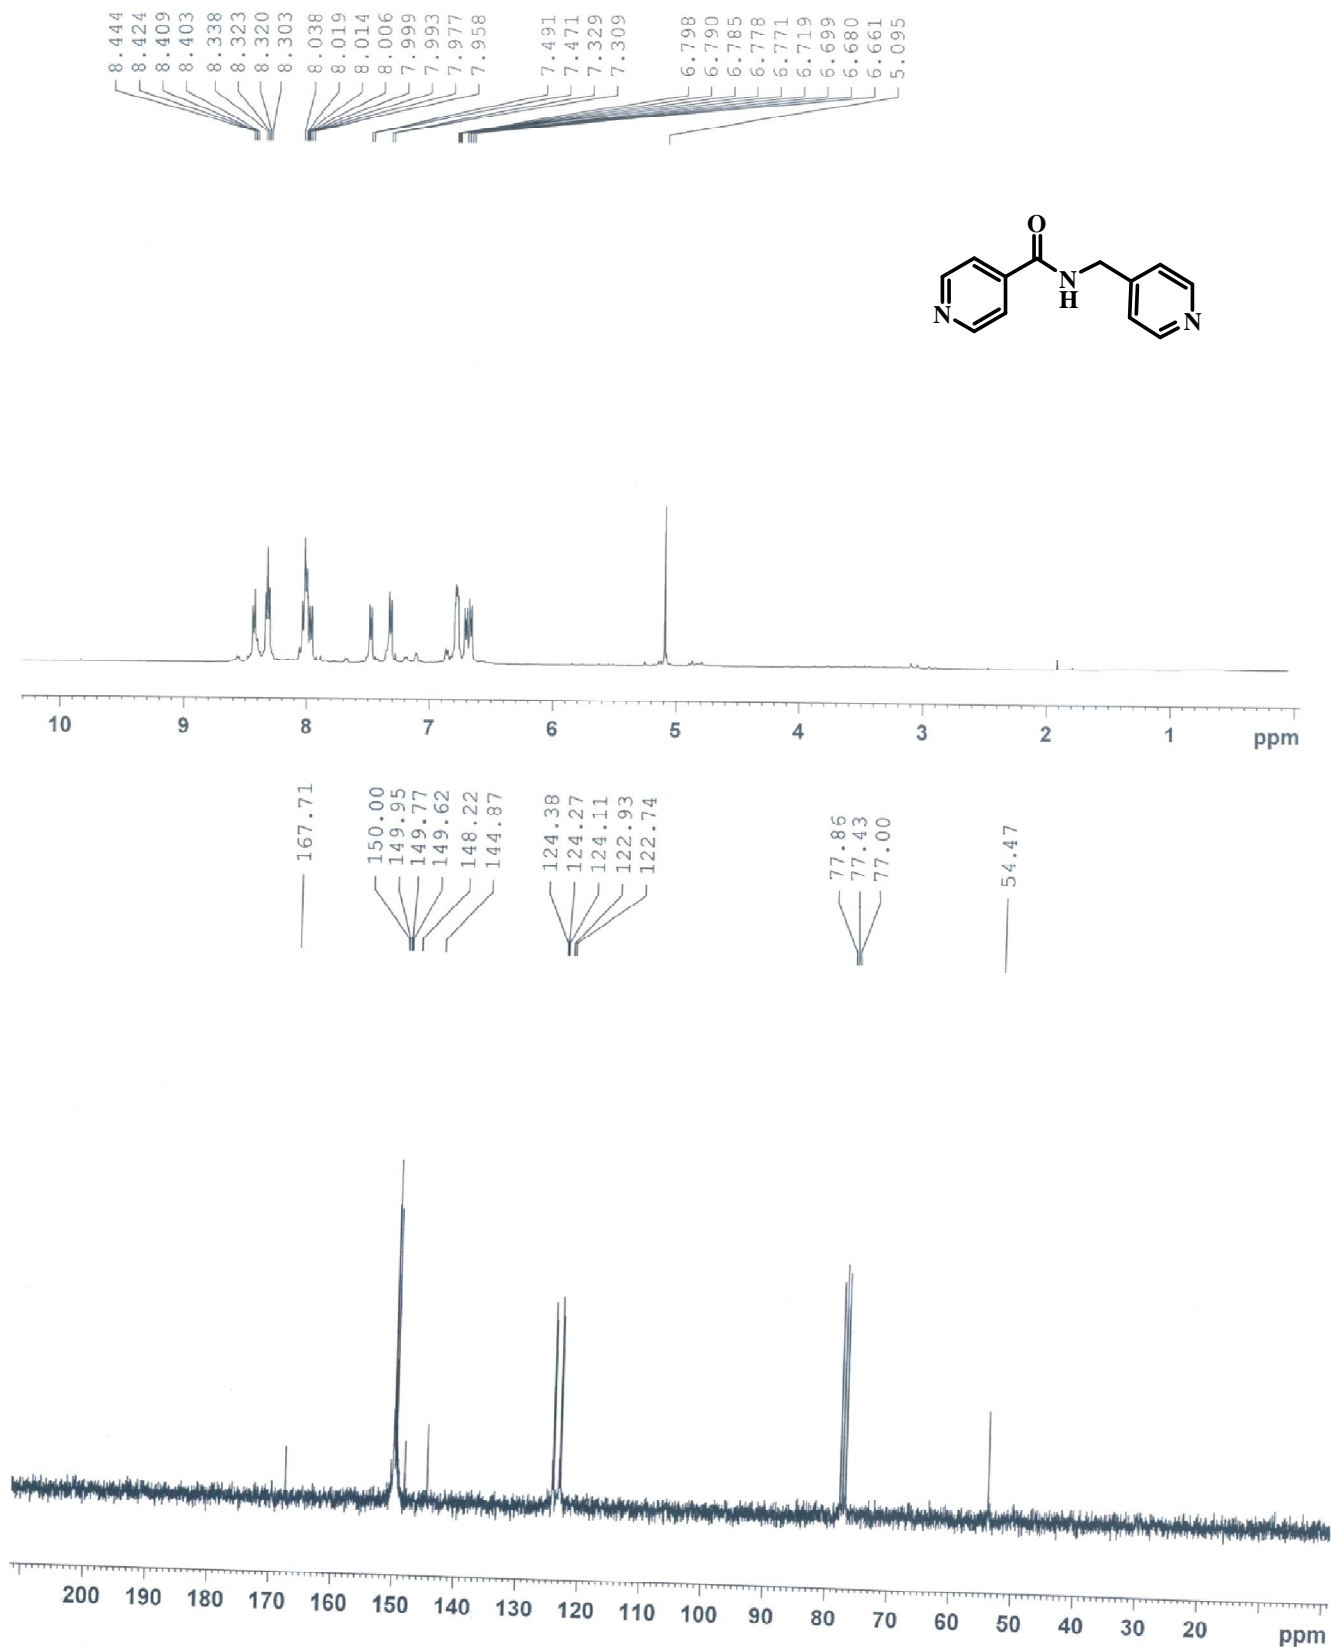

SI Figure 18:  $^1\text{H}$  and  $^{13}\text{C}$ -NMR spectra of compound **8e**

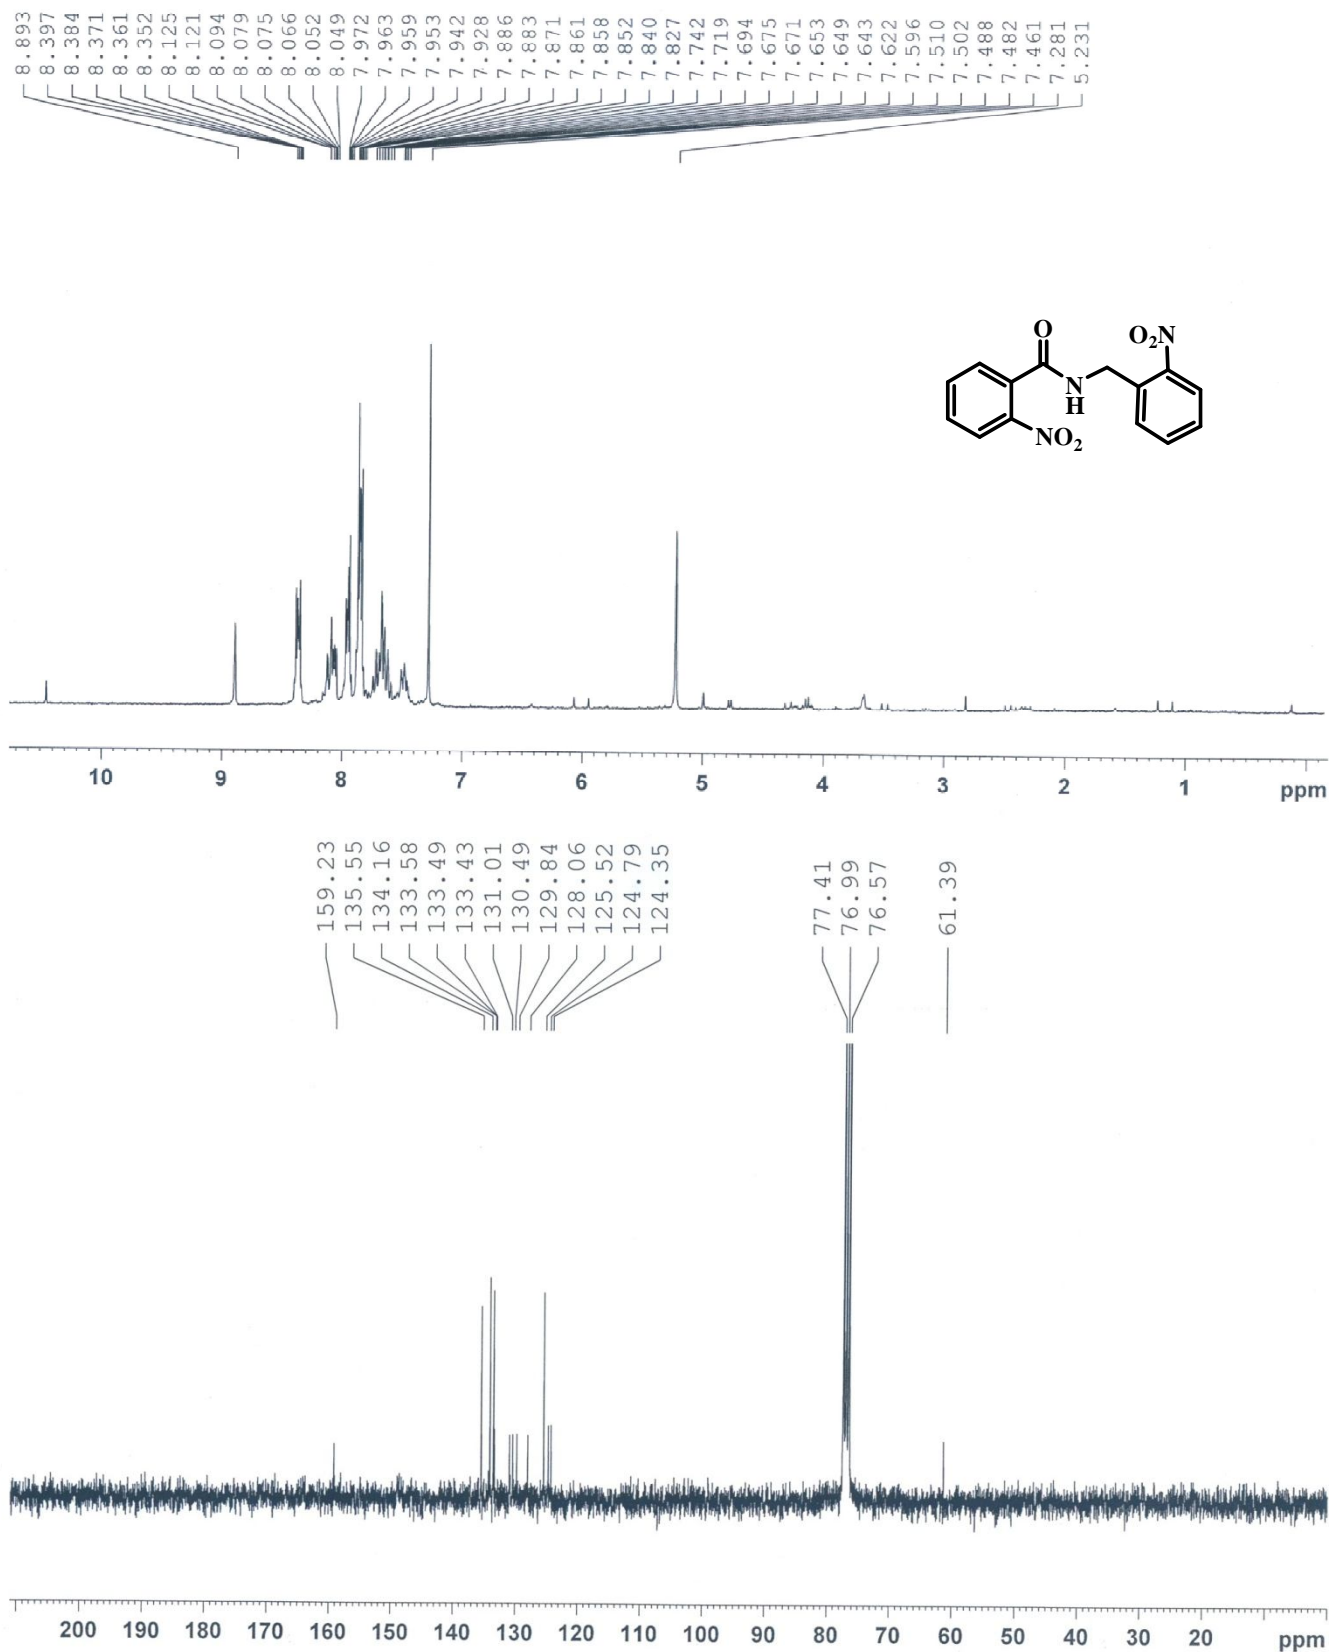



SI Figure 19:  $^1\text{H}$  and  $^{13}\text{C}$ -NMR spectra of compound **8f**

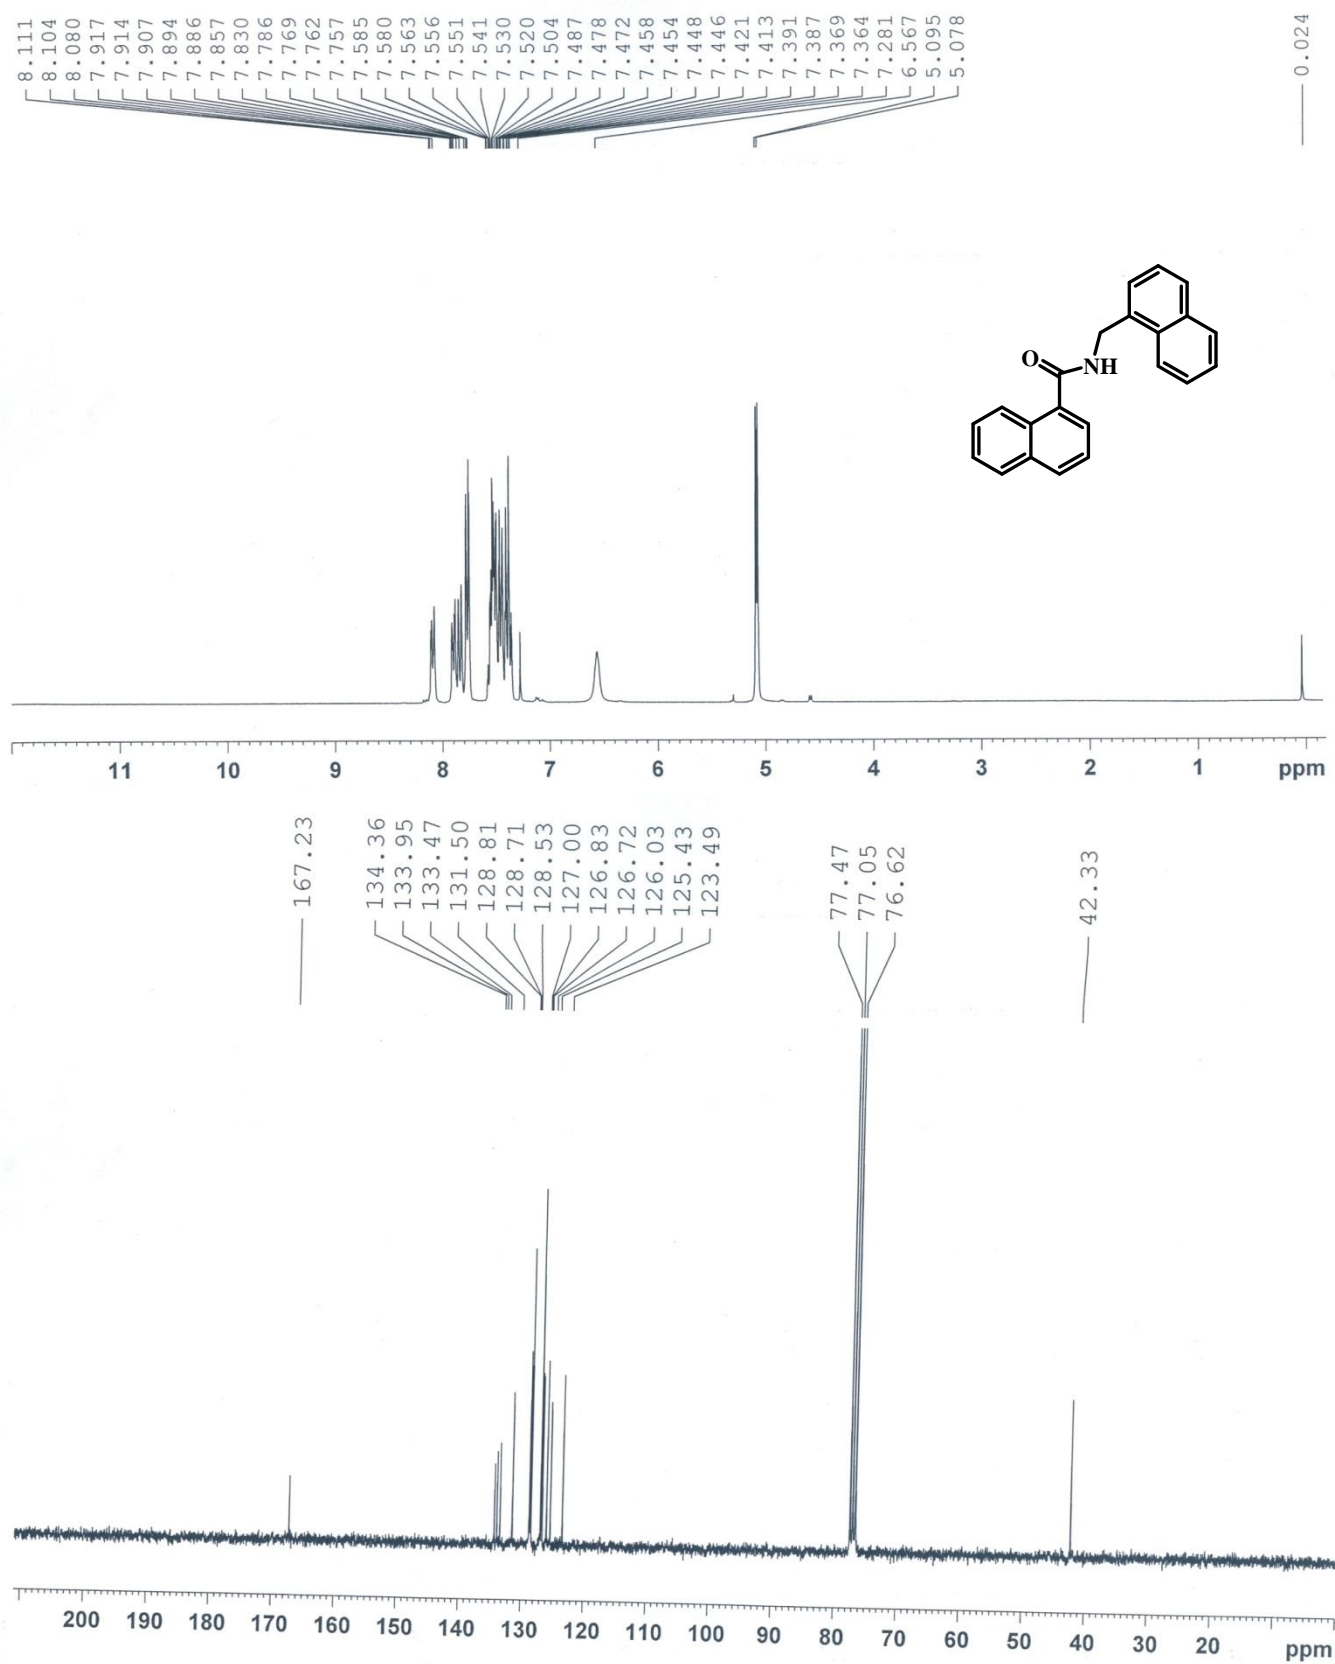

SI Figure 20:  $^1\text{H}$  and  $^{13}\text{C}$ -NMR spectra of compound **8g**

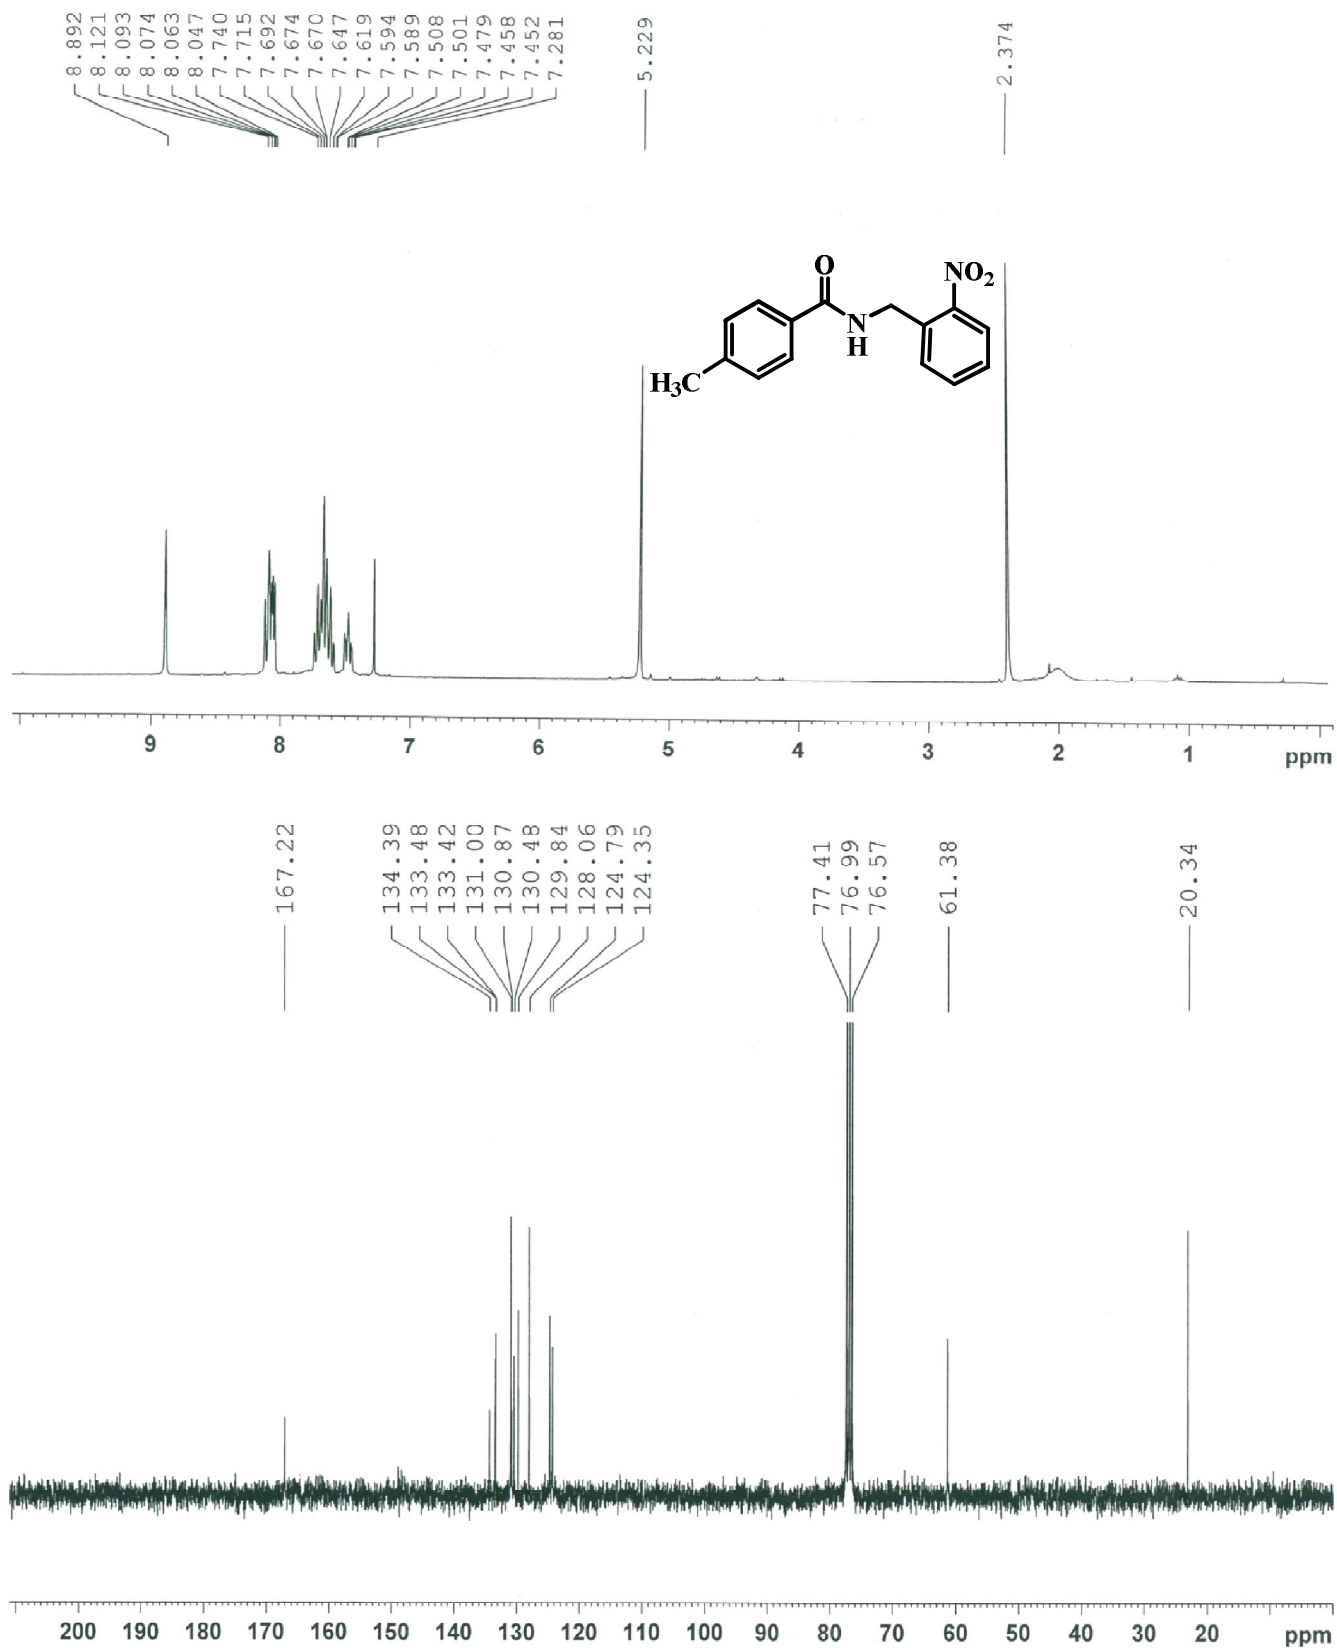

SI Figure 21:  $^1\text{H}$  and  $^{13}\text{C}$ -NMR spectra of compound **9a**

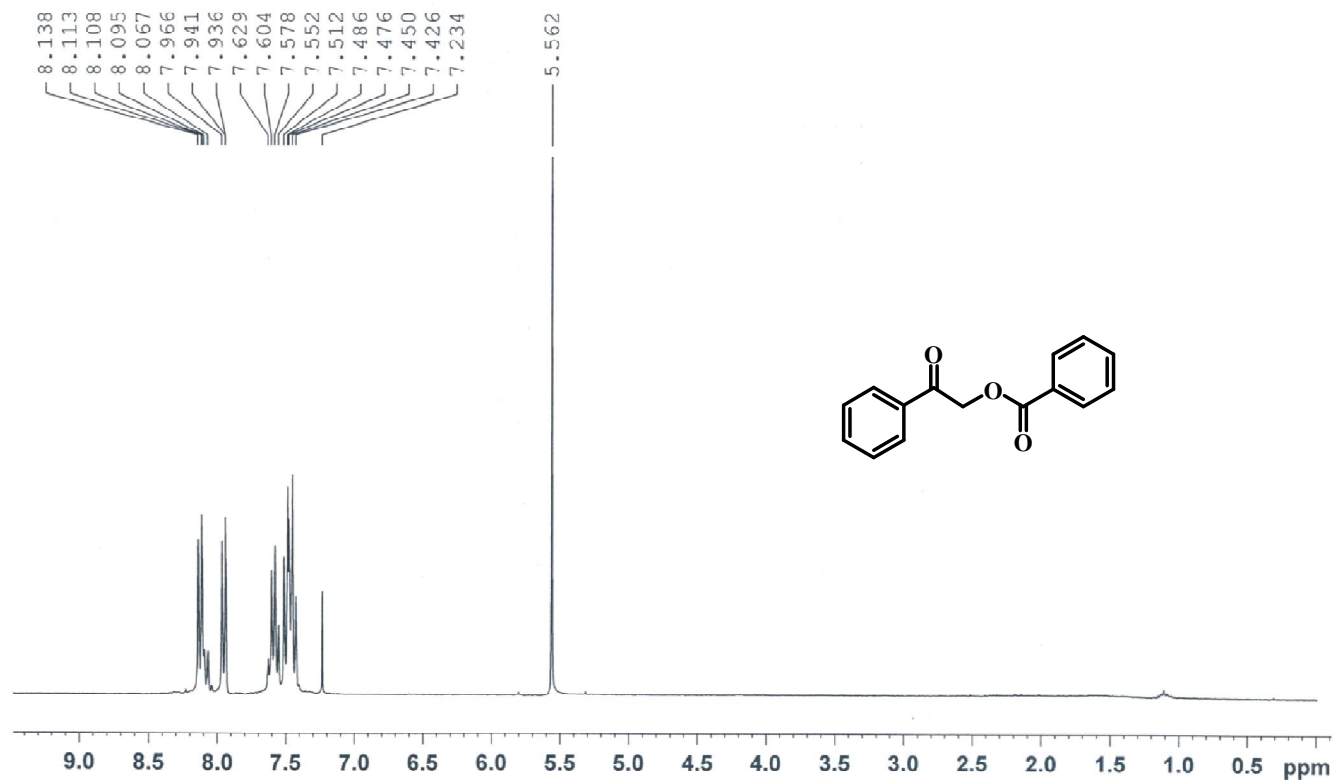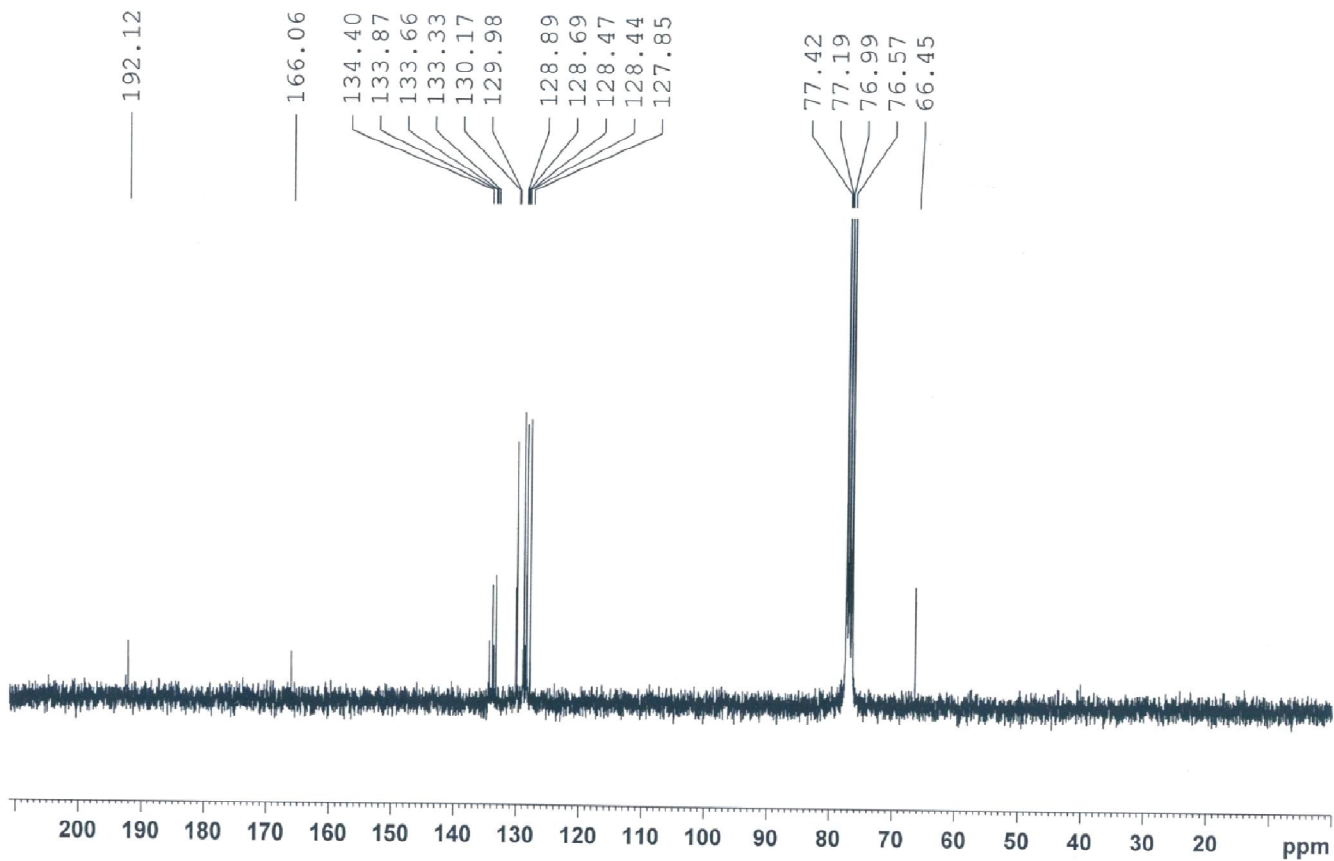

SI Figure 22:  $^1\text{H}$  and  $^{13}\text{C}$ -NMR spectra of compound **9b**

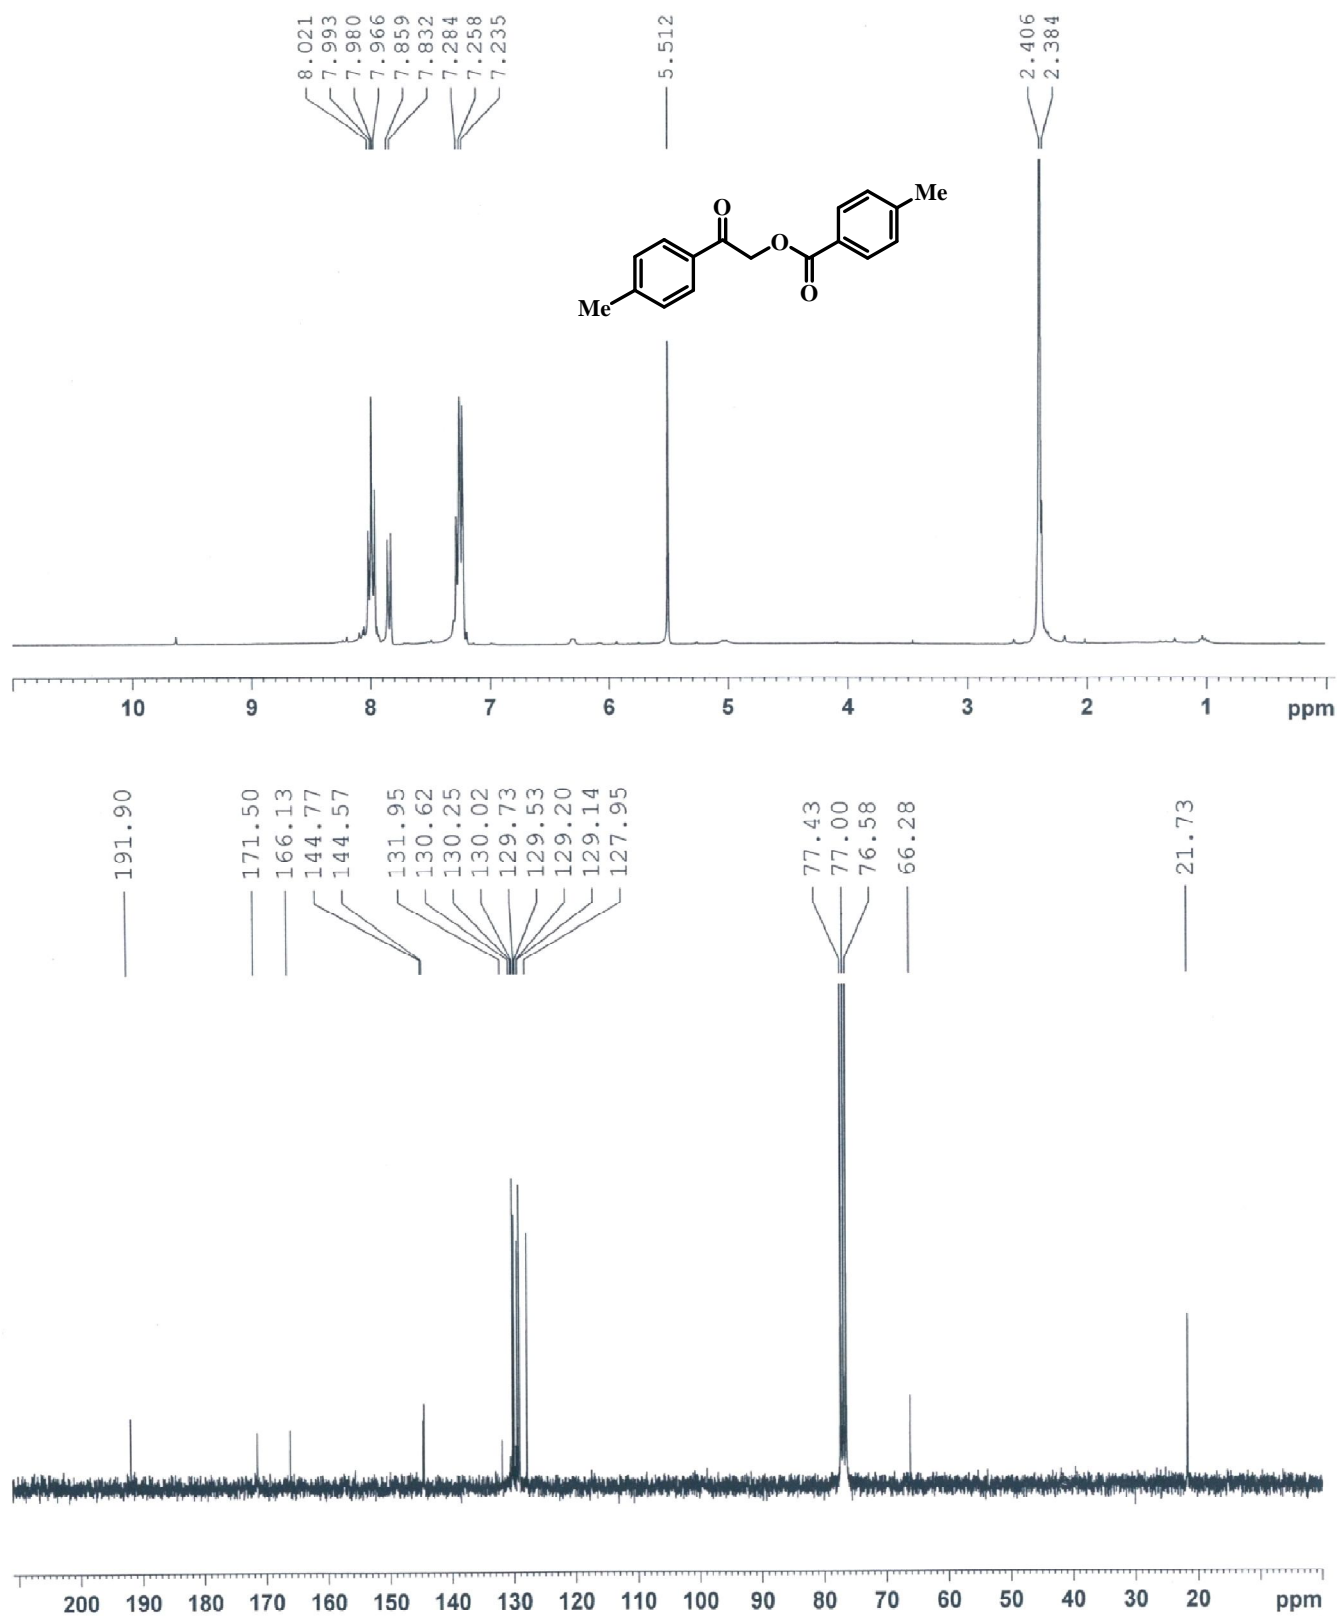

SI Figure 23:  $^1\text{H}$  and  $^{13}\text{C}$ -NMR spectra of compound **9c**

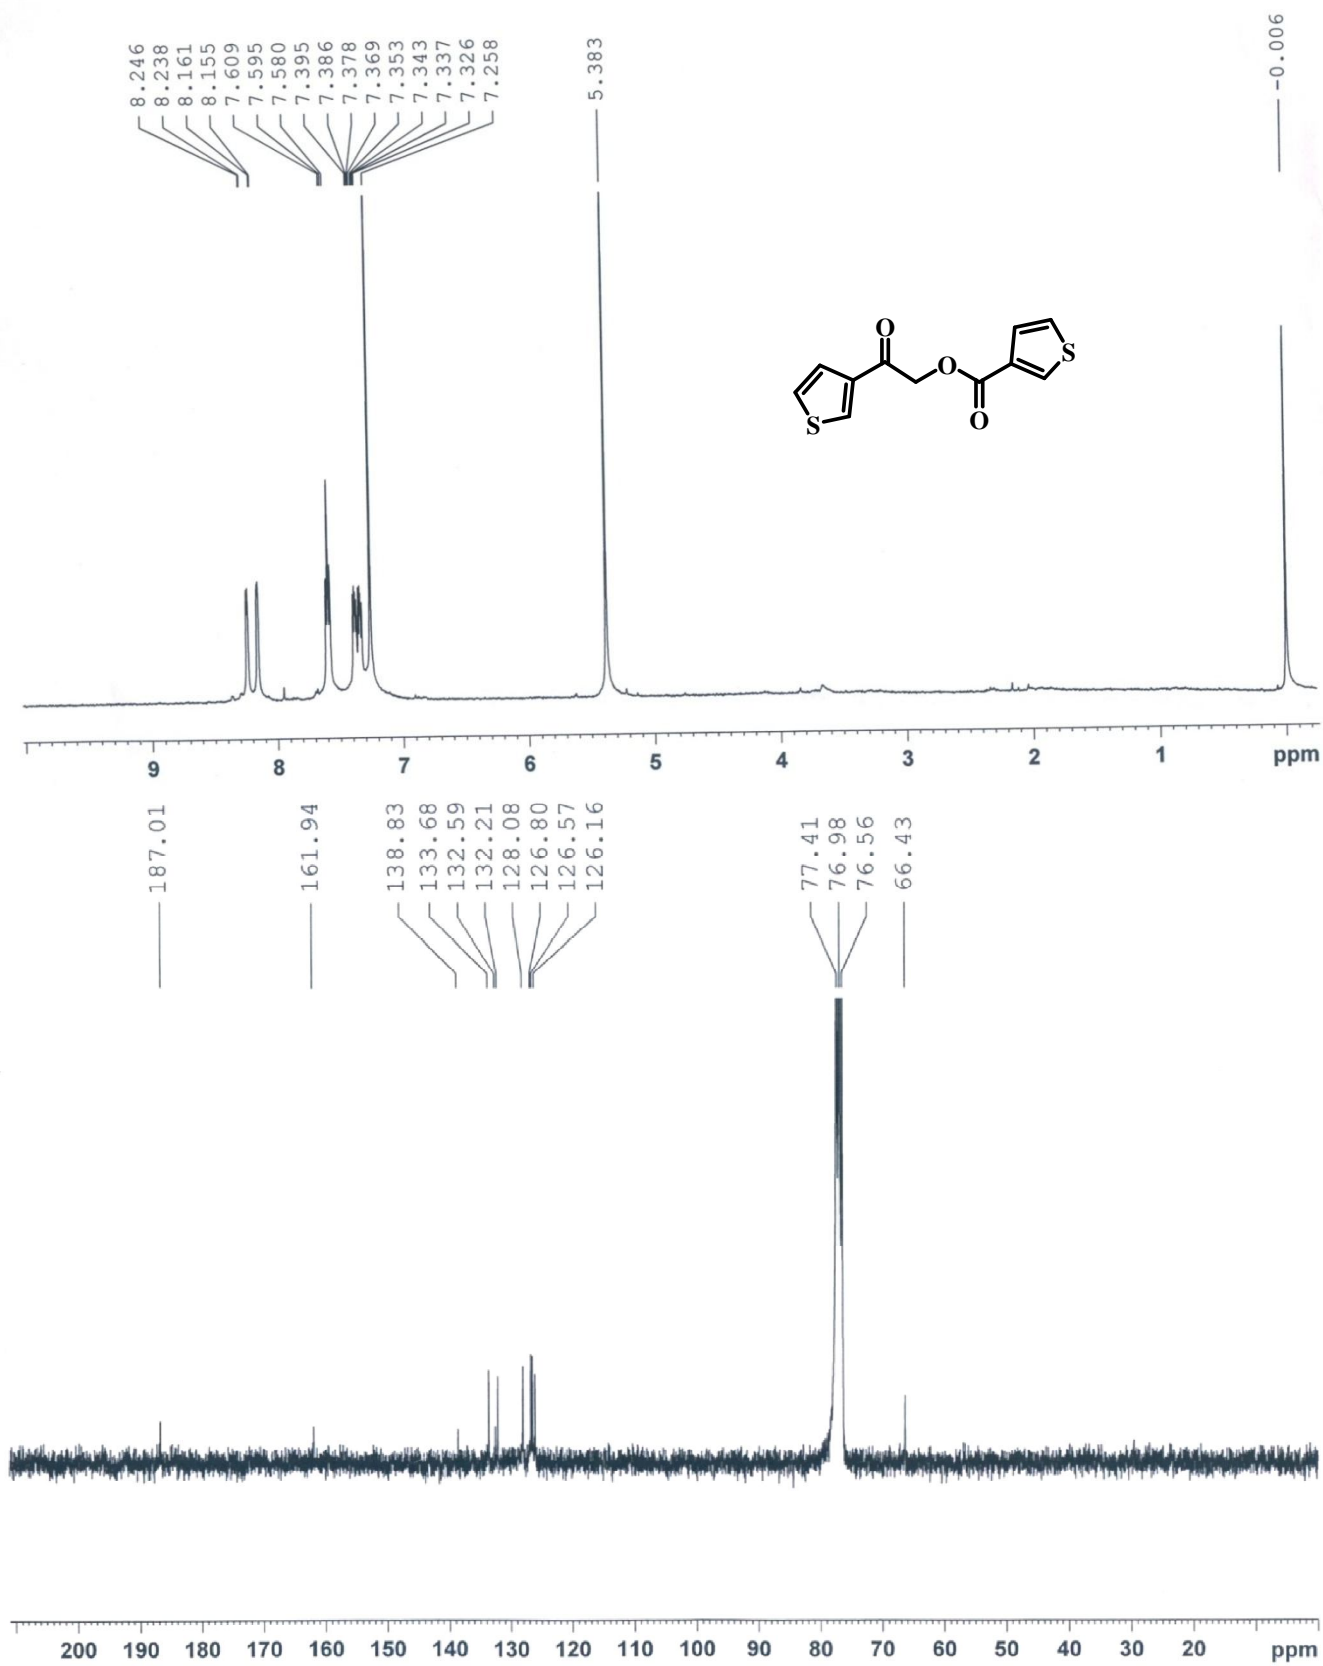

SI Figure 24:  $^1\text{H}$  and  $^{13}\text{C}$ -NMR spectra of compound **9d**

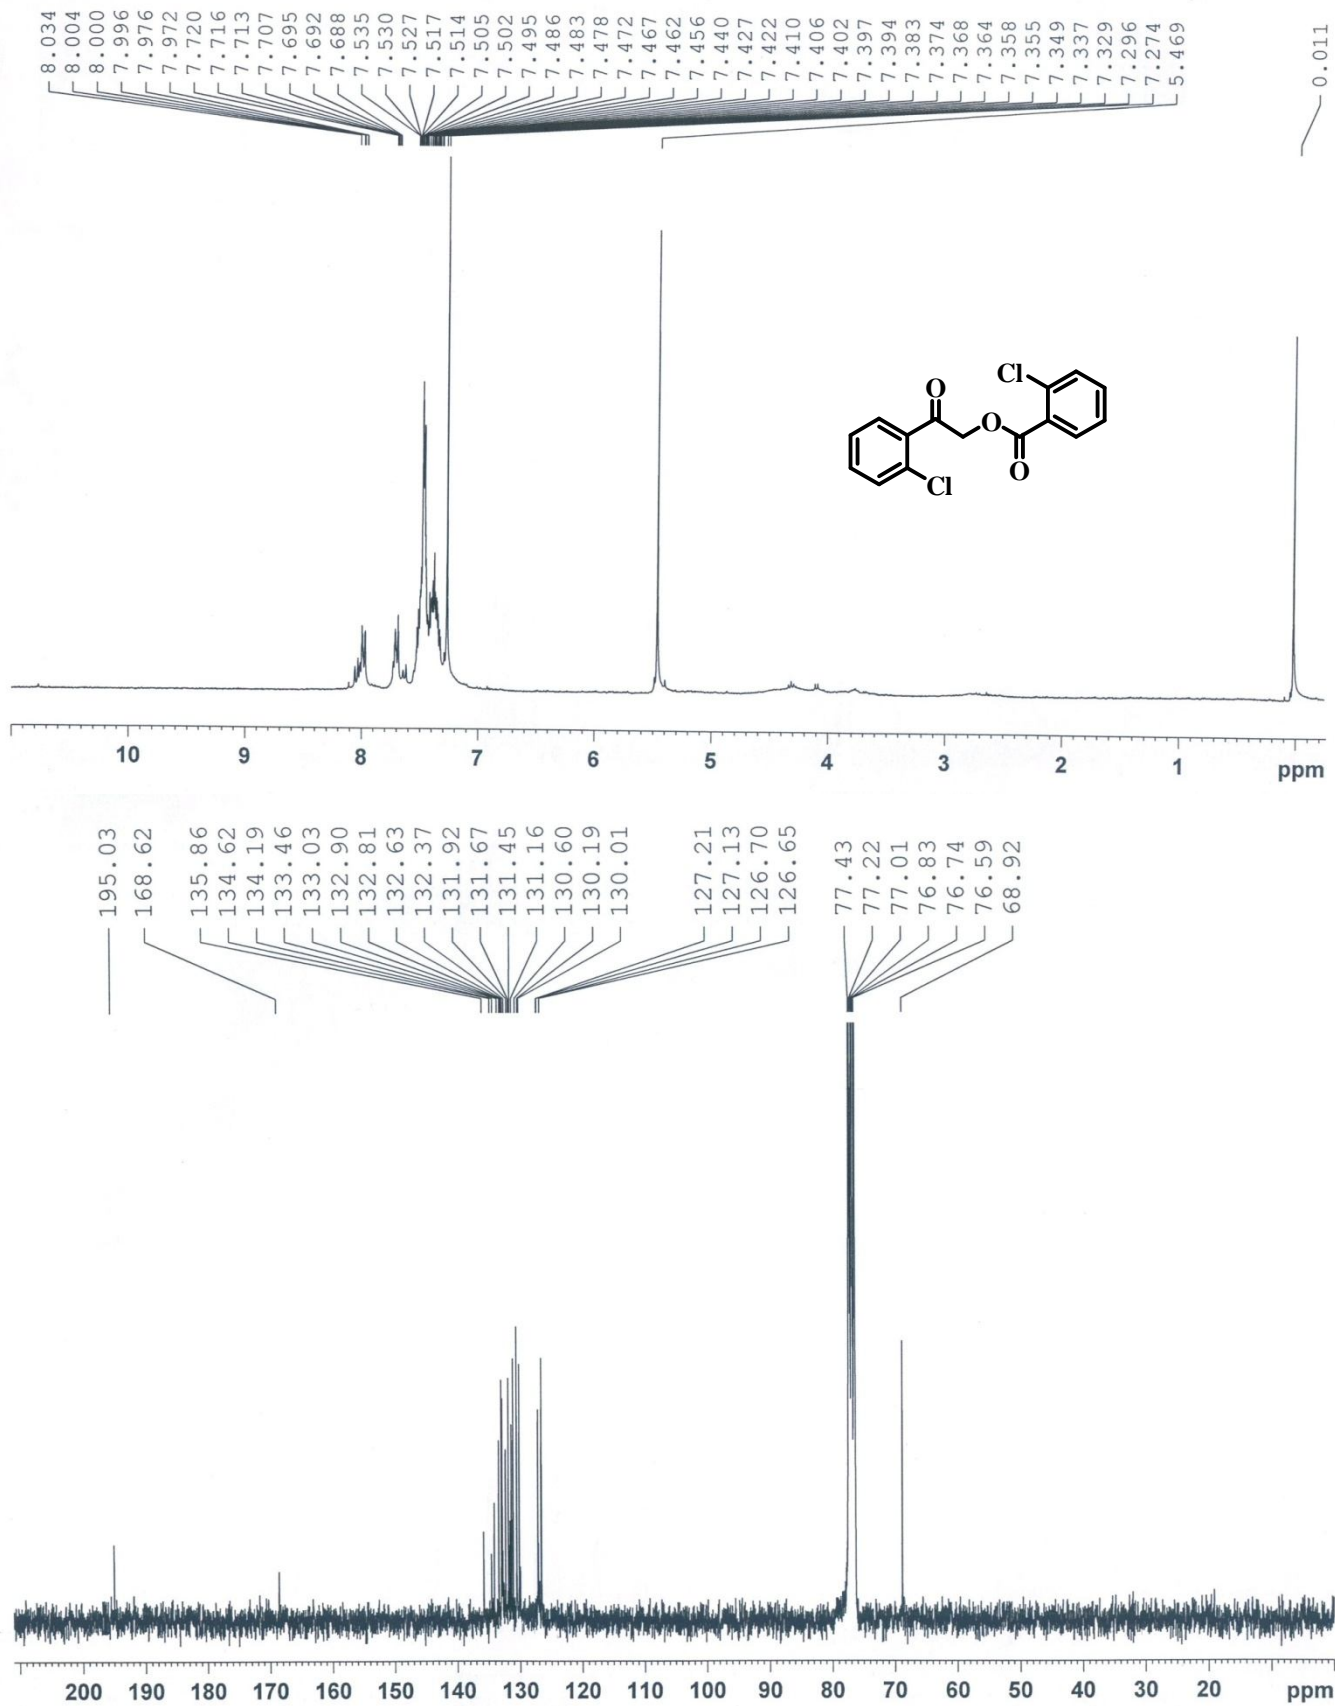

SI Figure 25:  $^1\text{H}$  and  $^{13}\text{C}$ -NMR spectra of compound **9e**

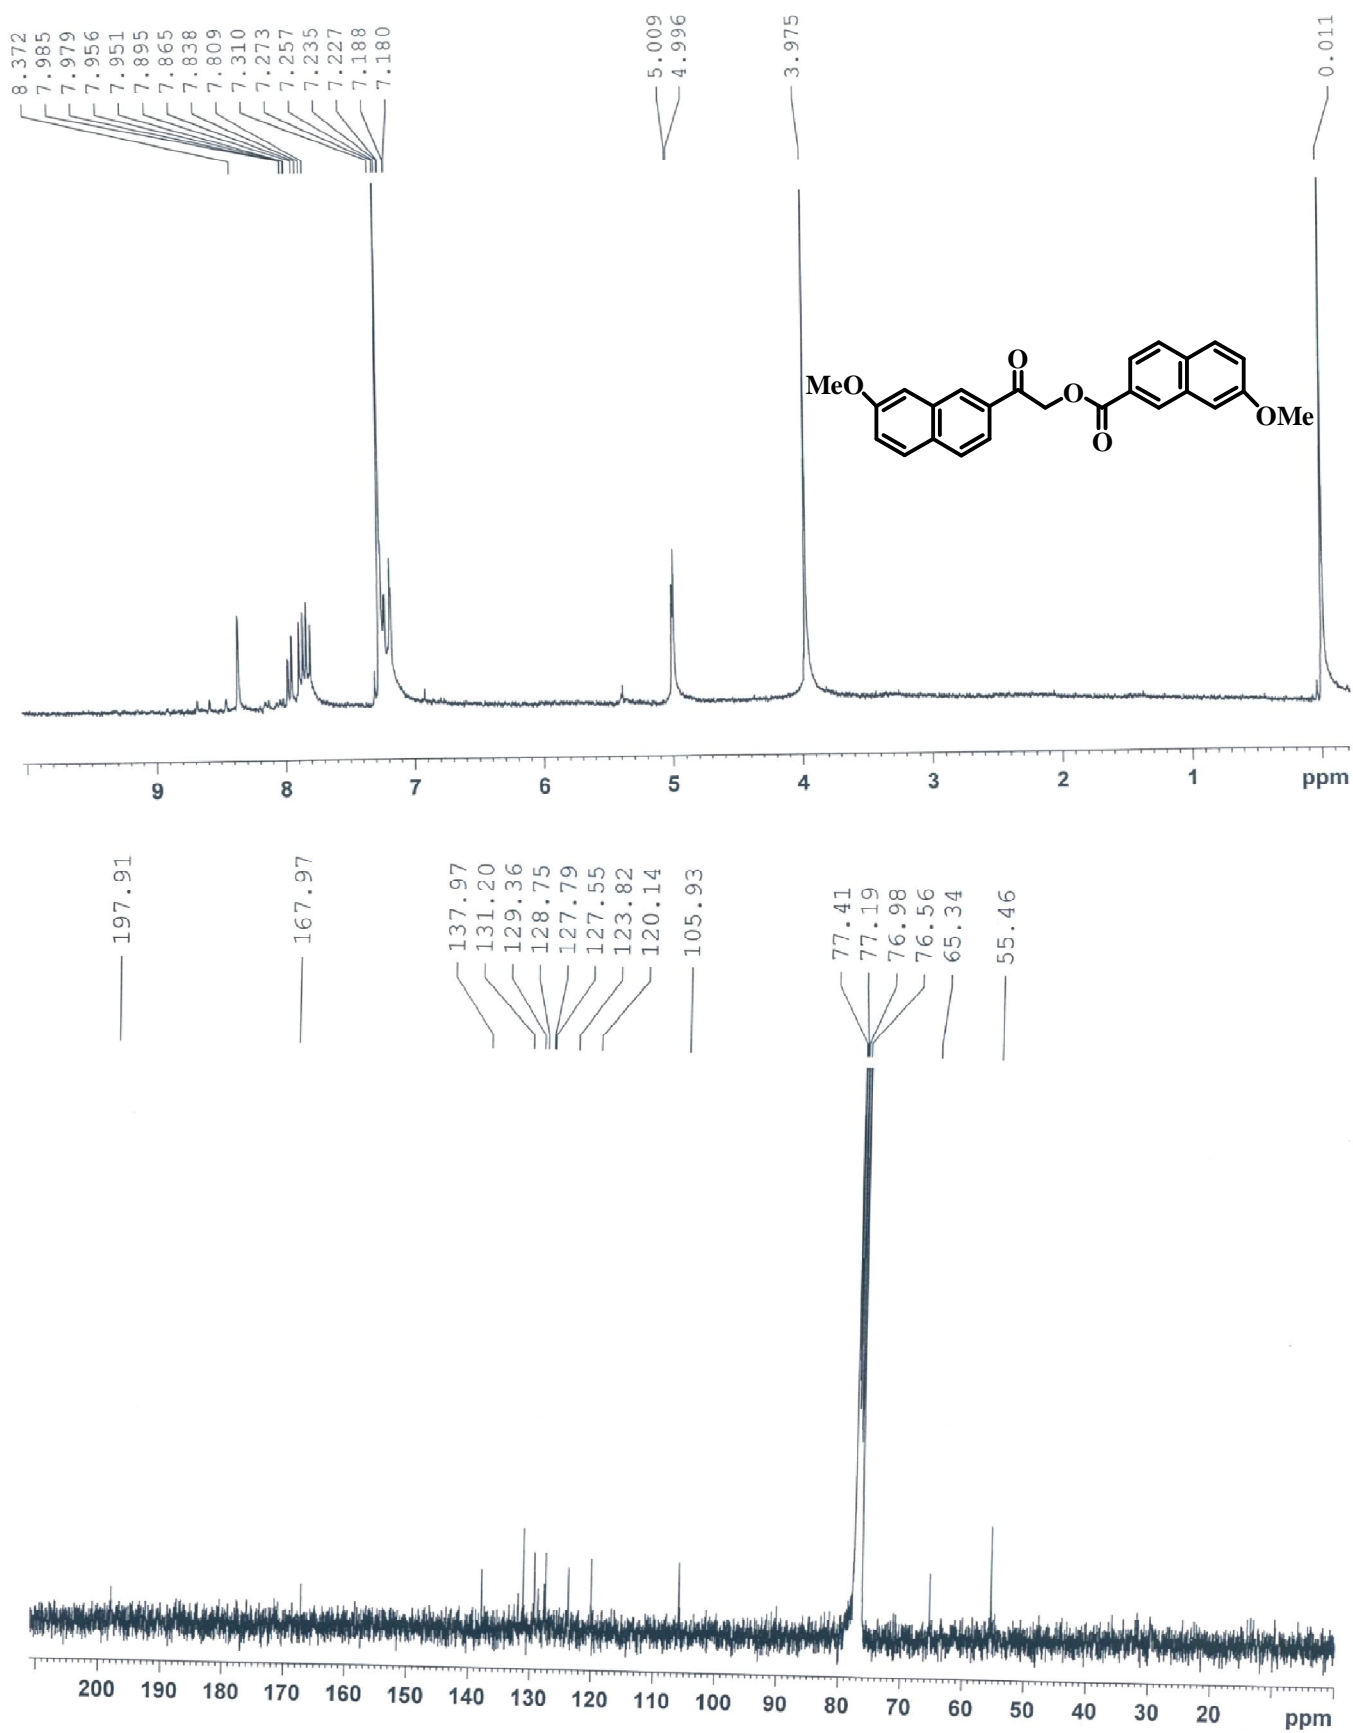

SI Figure 26:  $^1\text{H}$  and  $^{13}\text{C}$ -NMR spectra of compound **D<sub>2</sub>-9a**

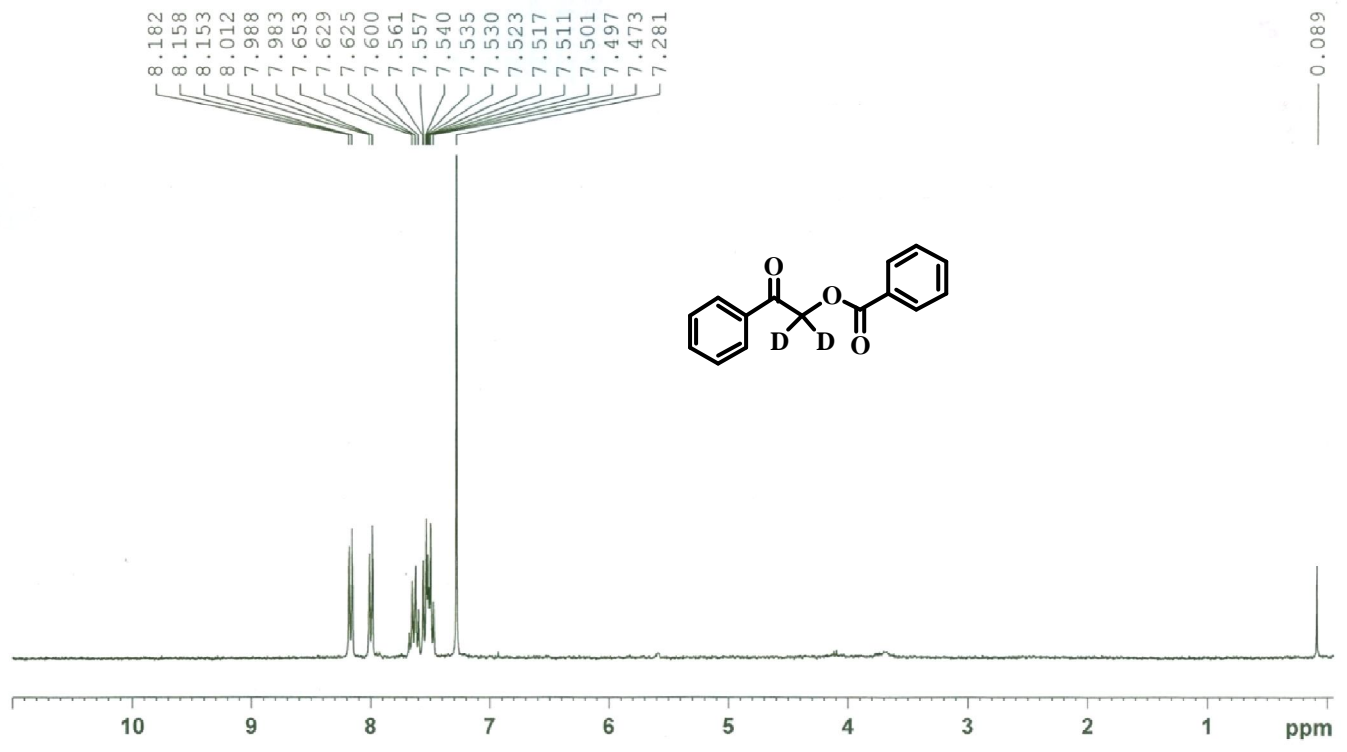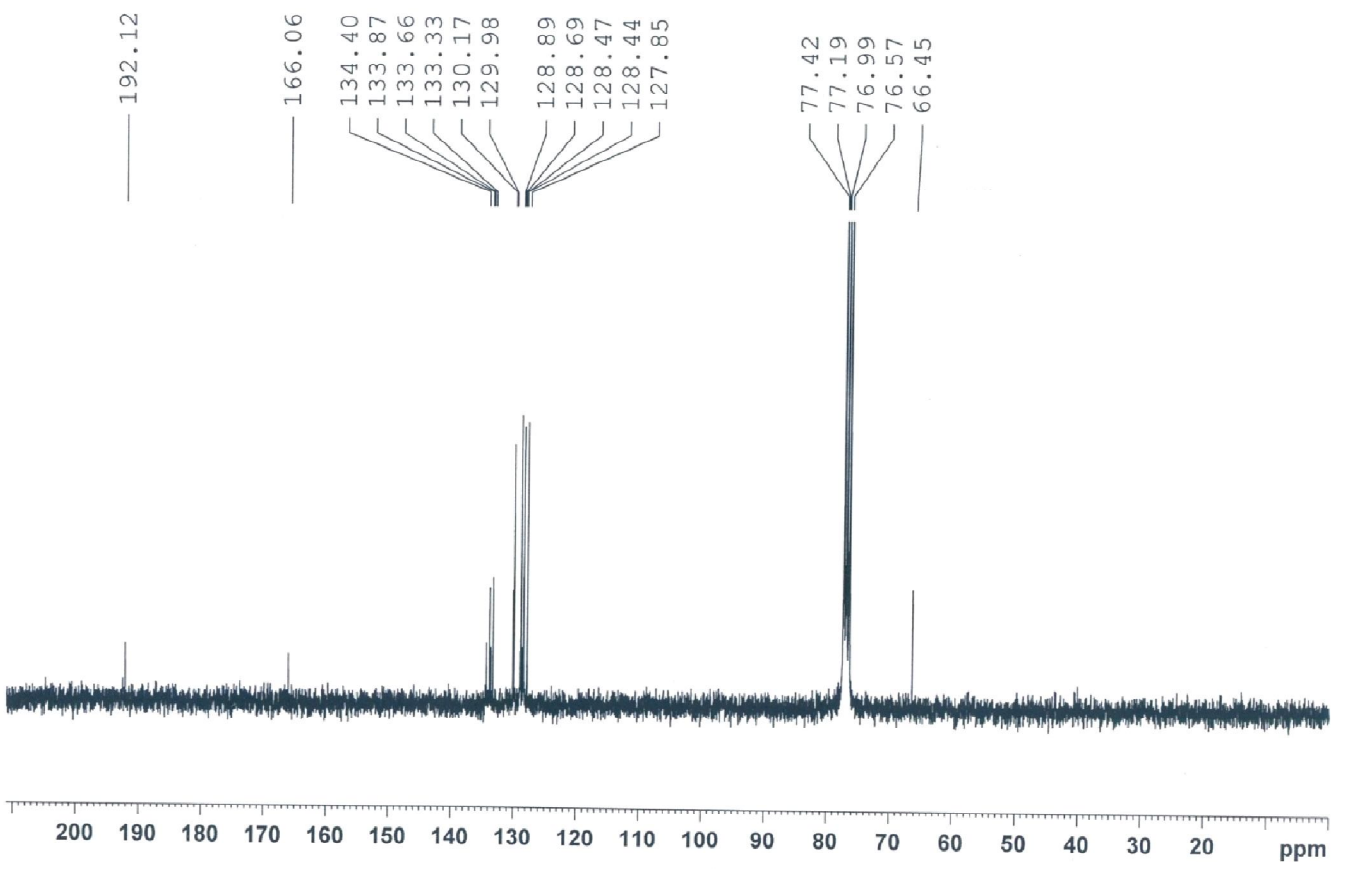



SI Figure 27:  $^1\text{H}$  and  $^{13}\text{C}$ -NMR spectra of compound **11a**

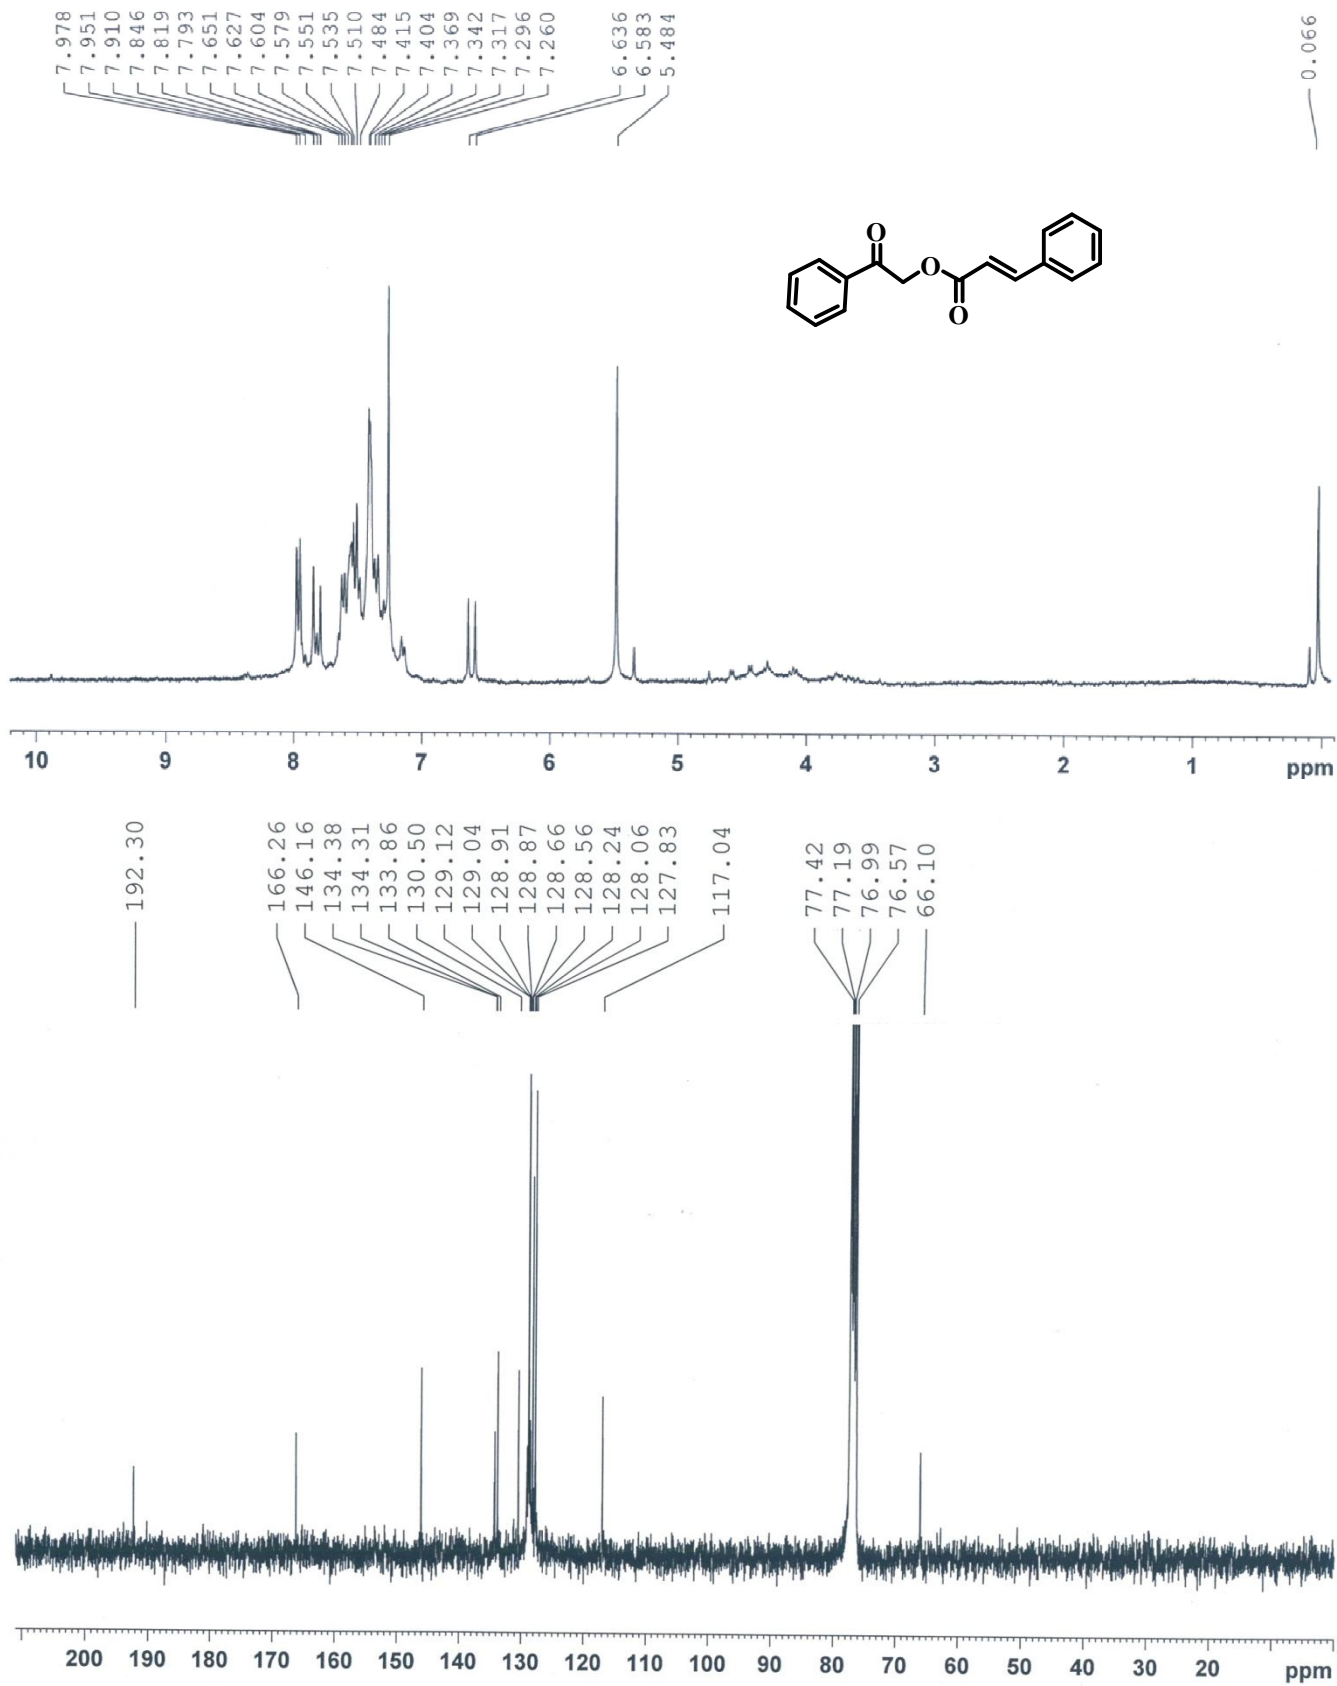

SI Figure 28:  $^1\text{H}$  and  $^{13}\text{C}$ -NMR spectra of compound **11b**

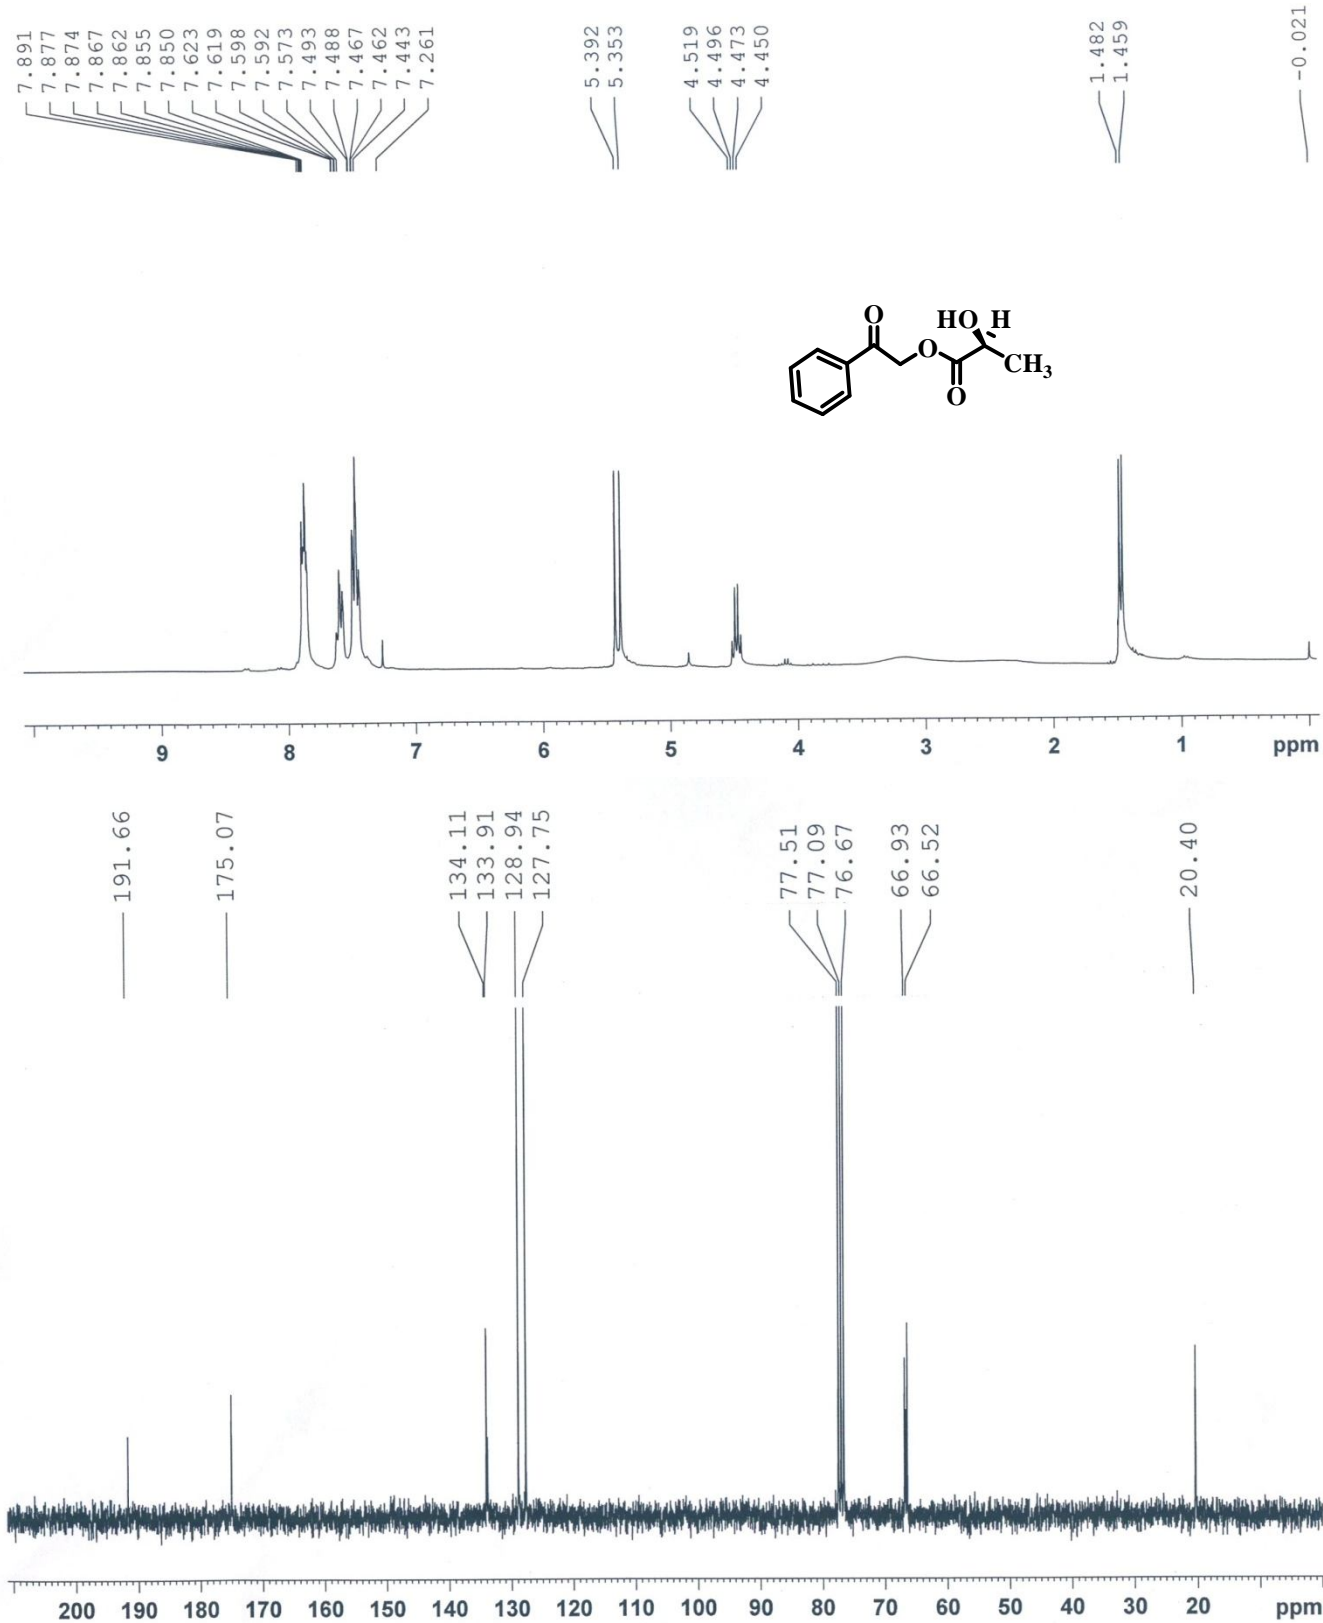

SI Figure 29:  $^1\text{H}$  and  $^{13}\text{C}$ -NMR spectra of compound **11c**

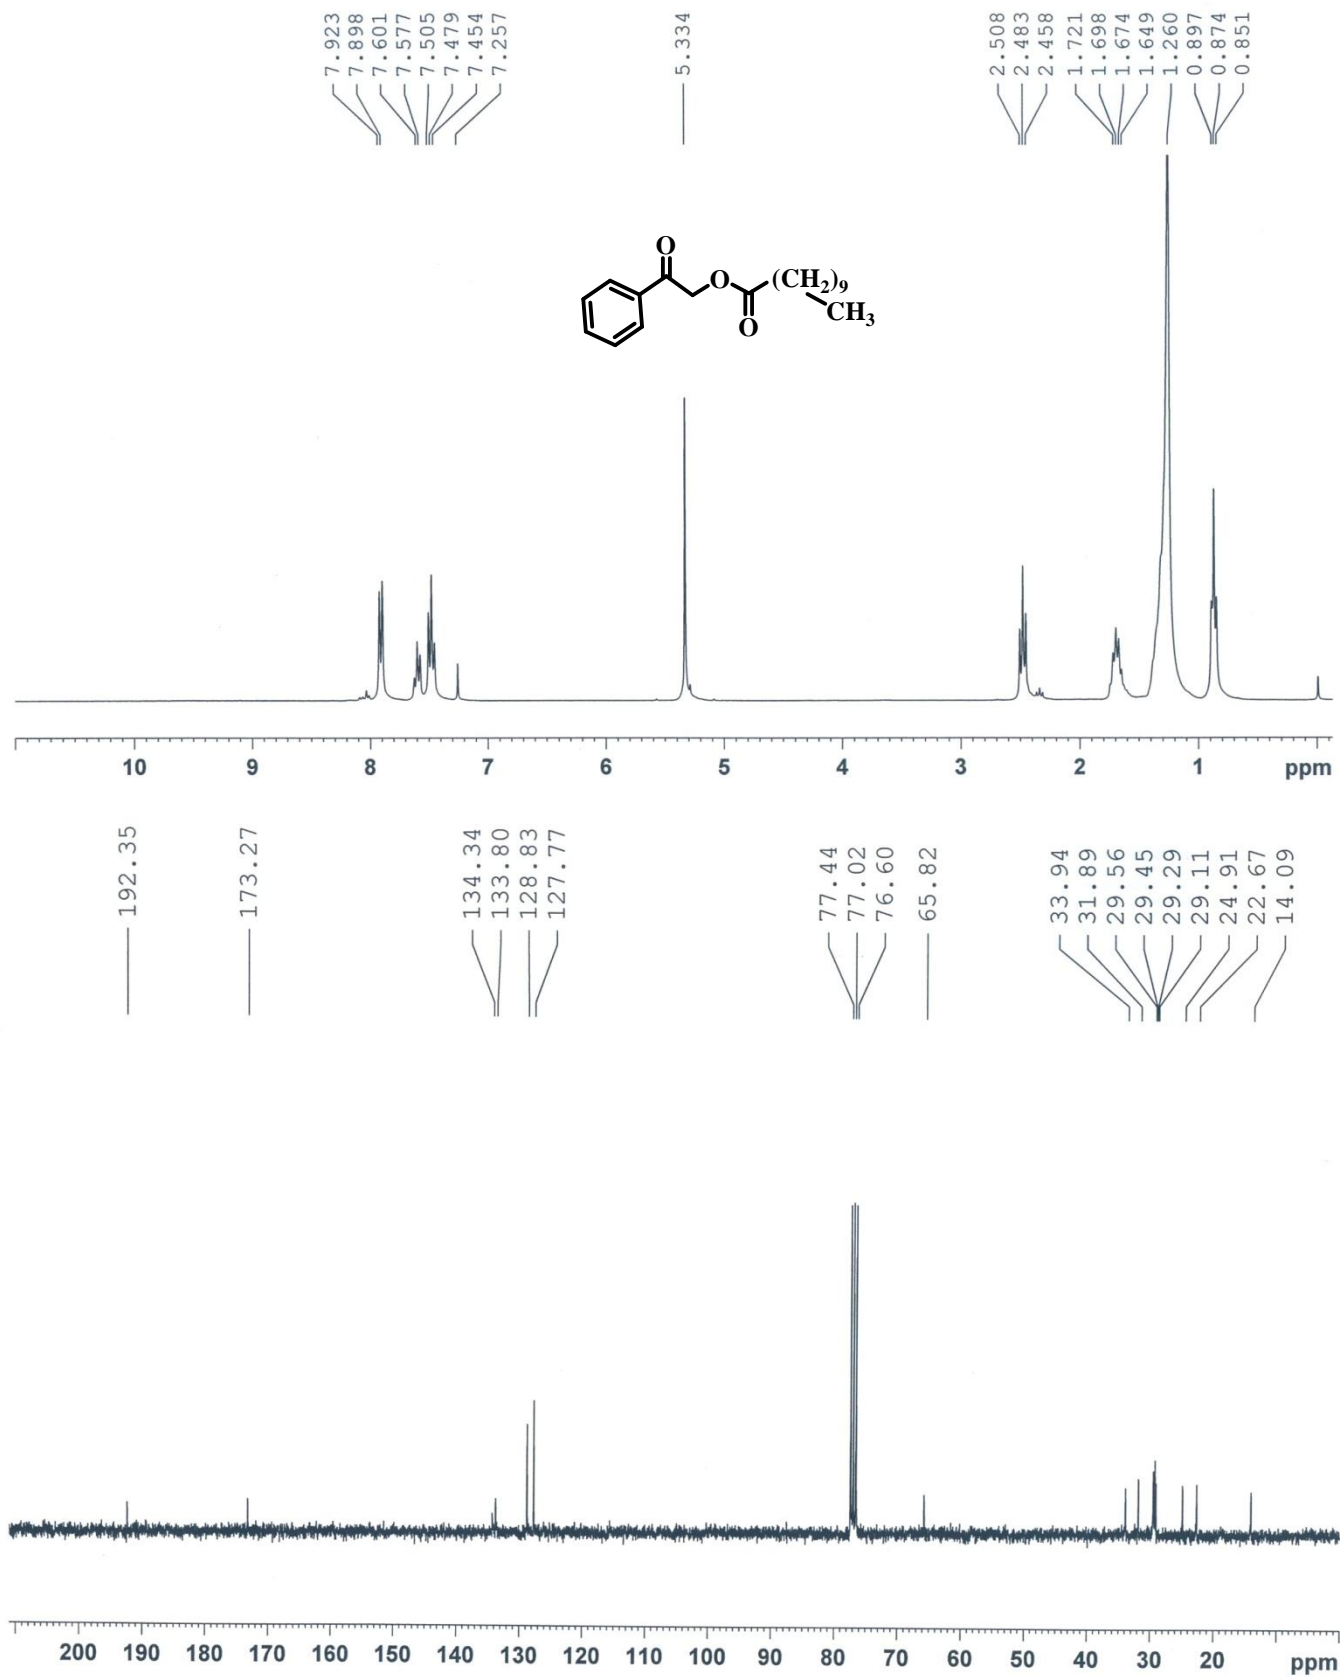

## 12. Crystal Summary Data of Compound 9a (CCDC 973403)

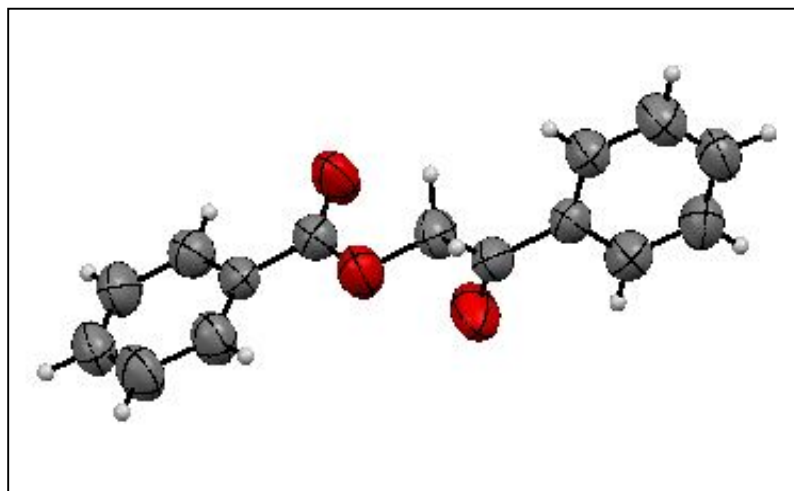

- ❖ Chemical formula and formula weight (M): C<sub>15</sub> H<sub>12</sub> O<sub>3</sub> and 240.25
- ❖ Crystal system: Monoclinic Unit-cell dimensions (angstrom or pm, degrees) and volume, with edges: a 9.0155(13) b 14.112(2) c 9.6804(14), 90.00, 90.552(5), 90.00, 1231.5(3)
- ❖ Temperature: 296 K
- ❖ Space group symbol: P2(1)/c
- ❖ No. of formula units in unit cell (Z): 4
- ❖ Number of reflections measured and/or number of independent reflections, Rint: 2027
- ❖ Final R values (and whether quoted for all or observed data): 0.0696

## 13. CIF data of compound 9a (CCDC 973403)

data\_skkk

```
_audit_creation_method    SHELXL-97
_chemical_name_systematic
;
?
;
_chemical_name_common     ?
_chemical_melting_point   ?
_chemical_formula_moiety  'C15 H12 O3'
_chemical_formula_sum     'C15 H12 O3'
_chemical_formula_weight  240.25
```

loop\_

```
_atom_type_symbol
_atom_type_description
_atom_type_scatter_dispersion_real
_atom_type_scatter_dispersion_imag
_atom_type_scatter_source
'C' 'C' 0.0033 0.0016
'International Tables Vol C Tables 4.2.6.8 and 6.1.1.4'
'H' 'H' 0.0000 0.0000
```

'International Tables Vol C Tables 4.2.6.8 and 6.1.1.4'  
'O' 'O' 0.0106 0.0060  
'International Tables Vol C Tables 4.2.6.8 and 6.1.1.4'

\_symmetry\_cell\_setting        Monoclinic  
\_symmetry\_space\_group\_name\_H-M P12(1)/c1

loop\_

\_symmetry\_equiv\_pos\_as\_xyz

'x, y, z'

'-x, y+1/2, -z+1/2'

'-x, -y, -z'

'x, -y-1/2, z-1/2'

\_cell\_length\_a                9.0155(13)  
\_cell\_length\_b                14.112(2)  
\_cell\_length\_c                9.6804(14)  
\_cell\_angle\_alpha             90.00  
\_cell\_angle\_beta              90.552(5)  
\_cell\_angle\_gamma             90.00  
\_cell\_volume                  1231.5(3)  
\_cell\_formula\_units\_Z         4  
\_cell\_measurement\_temperature 296(2)  
\_cell\_measurement\_reflms\_used ?  
\_cell\_measurement\_theta\_min ?  
\_cell\_measurement\_theta\_max ?

\_exptl\_crystal\_description    ?  
\_exptl\_crystal\_colour        ?  
\_exptl\_crystal\_size\_max      0.86  
\_exptl\_crystal\_size\_mid      0.66  
\_exptl\_crystal\_size\_min      0.44  
\_exptl\_crystal\_density\_meas   ?  
\_exptl\_crystal\_density\_diffn 1.296  
\_exptl\_crystal\_density\_method 'not measured'  
\_exptl\_crystal\_F\_000         504  
\_exptl\_absorpt\_coefficient\_mu 0.090  
\_exptl\_absorpt\_correction\_type ?  
\_exptl\_absorpt\_correction\_T\_min 0.9445  
\_exptl\_absorpt\_correction\_T\_max 0.9696  
\_exptl\_absorpt\_process\_details ?

\_exptl\_special\_details

;

?

;

\_diffn\_ambient\_temperature    296(2)  
\_diffn\_radiation\_wavelength   0.71073  
\_diffn\_radiation\_type         MoK $\alpha$

```

_diffrn_radiation_source      'fine-focus sealed tube'
_diffrn_radiation_monochromator graphite
_diffrn_measurement_device_type ?
_diffrn_measurement_method   ?
_diffrn_detector_area_resol_mean ?
_diffrn_reflns_number        12609
_diffrn_reflns_av_R_equivalents 0.0514
_diffrn_reflns_av_sigmaI/netI 0.0324
_diffrn_reflns_limit_h_min    -10
_diffrn_reflns_limit_h_max    10
_diffrn_reflns_limit_k_min    -16
_diffrn_reflns_limit_k_max    16
_diffrn_reflns_limit_l_min    -11
_diffrn_reflns_limit_l_max    11
_diffrn_reflns_theta_min      2.26
_diffrn_reflns_theta_max      24.51
_reflns_number_total          2027
_reflns_number_gt             1292
_reflns_threshold_expression   >2sigma(I)

_computing_data_collection    ?
_computing_cell_refinement    ?
_computing_data_reduction     ?
_computing_structure_solution 'SHELXS-97 (Sheldrick, 2008)'
_computing_structure_refinement 'SHELXL-97 (Sheldrick, 2008)'
_computing_molecular_graphics ?
_computing_publication_material ?

```

```
_refine_special_details
```

```
;
```

Refinement of  $F^2$  against ALL reflections. The weighted R-factor wR and goodness of fit S are based on  $F^2$ , conventional R-factors R are based on F, with F set to zero for negative  $F^2$ . The threshold expression of  $F^2 > 2\sigma(F^2)$  is used only for calculating R-factors(gt) etc. and is not relevant to the choice of reflections for refinement. R-factors based on  $F^2$  are statistically about twice as large as those based on F, and R-factors based on ALL data will be even larger.

```
;
```

```

_refine_ls_structure_factor_coef Fsqd
_refine_ls_matrix_type          full
_refine_ls_weighting_scheme     calc
_refine_ls_weighting_details
'calc w=1/[s^2*(Fo^2)+(0.1134P)^2+0.5410P] where P=(Fo^2+2Fc^2)/3'
_atom_sites_solution_primary    direct
_atom_sites_solution_secondary  difmap
_atom_sites_solution_hydrogens  geom
_refine_ls_hydrogen_treatment  mixed
_refine_ls_extinction_method    none
_refine_ls_extinction_coef      ?

```

\_refine\_ls\_number\_reflns 2027  
 \_refine\_ls\_number\_parameters 163  
 \_refine\_ls\_number\_restraints 0  
 \_refine\_ls\_R\_factor\_all 0.1048  
 \_refine\_ls\_R\_factor\_gt 0.0696  
 \_refine\_ls\_wR\_factor\_ref 0.2377  
 \_refine\_ls\_wR\_factor\_gt 0.2077  
 \_refine\_ls\_goodness\_of\_fit\_ref 1.091  
 \_refine\_ls\_restrained\_S\_all 1.091  
 \_refine\_ls\_shift/su\_max 0.050  
 \_refine\_ls\_shift/su\_mean 0.007

loop\_

\_atom\_site\_label  
 \_atom\_site\_type\_symbol  
 \_atom\_site\_fract\_x  
 \_atom\_site\_fract\_y  
 \_atom\_site\_fract\_z  
 \_atom\_site\_U\_iso\_or\_equiv  
 \_atom\_site\_adp\_type  
 \_atom\_site\_occupancy  
 \_atom\_site\_symmetry\_multiplicity  
 \_atom\_site\_calc\_flag  
 \_atom\_site\_refinement\_flags  
 \_atom\_site\_disorder\_assembly  
 \_atom\_site\_disorder\_group  
 O1 O 0.7459(3) 0.10289(18) 0.9941(3) 0.0844(9) Uani 1 1 d . . .  
 O2 O 0.6010(4) 0.00754(19) 0.8002(4) 0.1091(11) Uani 1 1 d . . .  
 O3 O 0.9370(3) 0.08358(17) 0.8493(3) 0.0935(10) Uani 1 1 d . . .  
 C1 C 0.6239(5) -0.3416(3) 0.8611(5) 0.0852(12) Uani 1 1 d . . .  
 H1 H 0.6146 -0.4071 0.8552 0.102 Uiso 1 1 calc R . .  
 C2 C 0.5414(5) -0.2842(3) 0.7762(5) 0.0854(12) Uani 1 1 d . . .  
 H2 H 0.4767 -0.3108 0.7116 0.102 Uiso 1 1 calc R . .  
 C3 C 0.5534(4) -0.1876(3) 0.7858(4) 0.0803(11) Uani 1 1 d . . .  
 H3 H 0.4961 -0.1492 0.7284 0.096 Uiso 1 1 calc R . .  
 C4 C 0.6505(4) -0.1470(2) 0.8805(4) 0.0642(9) Uani 1 1 d . . .  
 C5 C 0.6589(4) -0.0424(2) 0.8862(4) 0.0693(10) Uani 1 1 d . . .  
 C6 C 0.7372(4) 0.0007(2) 1.0036(4) 0.0725(10) Uani 1 1 d . . .  
 H6A H 0.6867 -0.0162 1.0881 0.087 Uiso 1 1 calc R . .  
 H6B H 0.8369 -0.0250 1.0089 0.087 Uiso 1 1 calc R . .  
 C7 C 0.8532(4) 0.1361(2) 0.9074(4) 0.0660(9) Uani 1 1 d . . .  
 C8 C 0.8577(3) 0.2402(2) 0.8989(4) 0.0609(9) Uani 1 1 d . . .  
 C9 C 0.9514(4) 0.2810(3) 0.8047(4) 0.0766(11) Uani 1 1 d . . .  
 H9 H 1.0086 0.2427 0.7479 0.092 Uiso 1 1 calc R . .  
 C10 C 0.9611(4) 0.3784(3) 0.7941(5) 0.0857(12) Uani 1 1 d . . .  
 H10 H 1.0236 0.4055 0.7292 0.103 Uiso 1 1 calc R . .  
 C11 C 0.8793(5) 0.4351(3) 0.8783(5) 0.0859(12) Uani 1 1 d . . .  
 H11 H 0.8859 0.5006 0.8704 0.103 Uiso 1 1 calc R . .  
 C12 C 0.7209(5) -0.3016(3) 0.9553(5) 0.0913(13) Uani 1 1 d . . .  
 H12 H 0.7781 -0.3403 1.0124 0.110 Uiso 1 1 calc R . .

C13 C 0.7334(4) -0.2049(2) 0.9653(4) 0.0739(10) Uani 1 1 d . . .  
H13 H 0.7983 -0.1785 1.0298 0.089 Uiso 1 1 calc R . .  
C14 C 0.7738(4) 0.2970(3) 0.9843(4) 0.0790(11) Uani 1 1 d . . .  
H14 H 0.7093 0.2699 1.0475 0.095 Uiso 1 1 calc R . .  
C15 C 0.7867(5) 0.3954(3) 0.9751(5) 0.0935(13) Uani 1 1 d . . .  
H15 H 0.7330 0.4342 1.0341 0.112 Uiso 1 1 calc R . .

loop\_

\_atom\_site\_aniso\_label  
\_atom\_site\_aniso\_U\_11  
\_atom\_site\_aniso\_U\_22  
\_atom\_site\_aniso\_U\_33  
\_atom\_site\_aniso\_U\_23  
\_atom\_site\_aniso\_U\_13  
\_atom\_site\_aniso\_U\_12  
O1 0.0843(18) 0.0646(16) 0.105(2) -0.0029(13) 0.0143(16) -0.0008(13)  
O2 0.116(2) 0.0670(17) 0.144(3) 0.0200(18) -0.049(2) -0.0008(16)  
O3 0.0895(19) 0.0622(16) 0.129(2) -0.0069(16) 0.0300(18) 0.0090(14)  
C1 0.087(3) 0.058(2) 0.110(3) -0.008(2) 0.011(3) -0.001(2)  
C2 0.080(3) 0.072(3) 0.104(3) -0.011(2) 0.000(2) -0.011(2)  
C3 0.071(2) 0.072(2) 0.097(3) -0.002(2) -0.008(2) -0.0004(19)  
C4 0.0560(19) 0.057(2) 0.079(2) 0.0028(17) 0.0066(18) -0.0009(16)  
C5 0.056(2) 0.060(2) 0.092(3) 0.0097(19) 0.0008(19) 0.0002(16)  
C6 0.072(2) 0.057(2) 0.089(3) 0.0165(18) 0.000(2) -0.0053(17)  
C7 0.062(2) 0.058(2) 0.079(2) 0.0005(17) 0.0009(19) 0.0029(17)  
C8 0.0546(19) 0.0525(19) 0.075(2) -0.0054(15) -0.0047(17) 0.0019(15)  
C9 0.073(2) 0.068(2) 0.089(3) 0.002(2) 0.008(2) 0.0041(18)  
C10 0.081(3) 0.064(2) 0.112(3) 0.015(2) 0.006(2) -0.006(2)  
C11 0.092(3) 0.056(2) 0.110(3) 0.003(2) -0.009(3) -0.004(2)  
C12 0.098(3) 0.068(3) 0.107(3) 0.004(2) -0.004(3) 0.010(2)  
C13 0.073(2) 0.059(2) 0.089(3) 0.0001(19) -0.007(2) 0.0022(18)  
C14 0.087(3) 0.063(2) 0.087(3) -0.0055(19) 0.013(2) 0.0002(19)  
C15 0.105(3) 0.065(2) 0.111(3) -0.015(2) 0.013(3) 0.007(2)

\_geom\_special\_details

;  
All esds (except the esd in the dihedral angle between two l.s. planes)  
are estimated using the full covariance matrix. The cell esds are taken  
into account individually in the estimation of esds in distances, angles  
and torsion angles; correlations between esds in cell parameters are only  
used when they are defined by crystal symmetry. An approximate (isotropic)  
treatment of cell esds is used for estimating esds involving l.s. planes.  
;

loop\_

\_geom\_bond\_atom\_site\_label\_1  
\_geom\_bond\_atom\_site\_label\_2  
\_geom\_bond\_distance  
\_geom\_bond\_site\_symmetry\_2  
\_geom\_bond\_publ\_flag



O1 C7 1.369(4) . ?  
O1 C6 1.447(4) . ?  
O2 C5 1.205(4) . ?  
O3 C7 1.202(4) . ?  
C1 C2 1.369(6) . ?  
C1 C12 1.378(6) . ?  
C1 H1 0.9300 . ?  
C2 C3 1.369(5) . ?  
C2 H2 0.9300 . ?  
C3 C4 1.386(5) . ?  
C3 H3 0.9300 . ?  
C4 C13 1.375(5) . ?  
C4 C5 1.479(5) . ?  
C5 C6 1.464(5) . ?  
C6 H6A 0.9700 . ?  
C6 H6B 0.9700 . ?  
C7 C8 1.472(5) . ?  
C8 C9 1.375(5) . ?  
C8 C14 1.382(5) . ?  
C9 C10 1.382(5) . ?  
C9 H9 0.9300 . ?  
C10 C11 1.364(6) . ?  
C10 H10 0.9300 . ?  
C11 C15 1.379(6) . ?  
C11 H11 0.9300 . ?  
C12 C13 1.372(5) . ?  
C12 H12 0.9300 . ?  
C13 H13 0.9300 . ?  
C14 C15 1.397(5) . ?  
C14 H14 0.9300 . ?  
C15 H15 0.9300 . ?

loop\_

\_geom\_angle\_atom\_site\_label\_1  
\_geom\_angle\_atom\_site\_label\_2  
\_geom\_angle\_atom\_site\_label\_3  
\_geom\_angle  
\_geom\_angle\_site\_symmetry\_1  
\_geom\_angle\_site\_symmetry\_3  
\_geom\_angle\_publ\_flag  
C7 O1 C6 114.8(3) . . ?  
C2 C1 C12 119.5(4) . . ?  
C2 C1 H1 120.3 . . ?  
C12 C1 H1 120.3 . . ?  
C3 C2 C1 120.4(4) . . ?  
C3 C2 H2 119.8 . . ?  
C1 C2 H2 119.8 . . ?  
C2 C3 C4 120.4(4) . . ?  
C2 C3 H3 119.8 . . ?  
C4 C3 H3 119.8 . . ?

C13 C4 C3 119.0(3) . . ?  
C13 C4 C5 122.9(3) . . ?  
C3 C4 C5 118.1(3) . . ?  
O2 C5 C6 119.7(3) . . ?  
O2 C5 C4 122.4(4) . . ?  
C6 C5 C4 117.9(3) . . ?  
O1 C6 C5 113.0(3) . . ?  
O1 C6 H6A 109.0 . . ?  
C5 C6 H6A 109.0 . . ?  
O1 C6 H6B 109.0 . . ?  
C5 C6 H6B 109.0 . . ?  
H6A C6 H6B 107.8 . . ?  
O3 C7 O1 121.8(3) . . ?  
O3 C7 C8 124.8(3) . . ?  
O1 C7 C8 113.3(3) . . ?  
C9 C8 C14 119.8(3) . . ?  
C9 C8 C7 118.2(3) . . ?  
C14 C8 C7 122.0(3) . . ?  
C8 C9 C10 120.3(4) . . ?  
C8 C9 H9 119.8 . . ?  
C10 C9 H9 119.8 . . ?  
C11 C10 C9 120.3(4) . . ?  
C11 C10 H10 119.8 . . ?  
C9 C10 H10 119.9 . . ?  
C10 C11 C15 120.2(4) . . ?  
C10 C11 H11 119.9 . . ?  
C15 C11 H11 119.9 . . ?  
C13 C12 C1 120.4(4) . . ?  
C13 C12 H12 119.8 . . ?  
C1 C12 H12 119.8 . . ?  
C12 C13 C4 120.4(4) . . ?  
C12 C13 H13 119.8 . . ?  
C4 C13 H13 119.8 . . ?  
C8 C14 C15 119.5(4) . . ?  
C8 C14 H14 120.3 . . ?  
C15 C14 H14 120.3 . . ?  
C11 C15 C14 119.9(4) . . ?  
C11 C15 H15 120.1 . . ?  
C14 C15 H15 120.1 . . ?

\_diffraction\_measured\_fraction\_theta\_max 0.988

\_diffraction\_refl\_theta\_full 24.51

\_diffraction\_measured\_fraction\_theta\_full 0.988

\_refine\_diff\_density\_max 0.156

\_refine\_diff\_density\_min -0.256

\_refine\_diff\_density\_rms 0.049

\_atom\_sites\_special\_details

;

The structure was solved using Direct Methods (ShelXS). RE = 0.2, Nqual = -1, Ralpha = 0.030
